# Supplementary material for: Nemo-like kinase is a novel regulator of spinal and bulbar muscular atrophy
Source: eLife journal article supplement (doi:10.7554/elife.08493), 2015-08-26

HA-AR25Q  
pcDNA3.1  
-DHT

HA-AR25Q  
FLAG-NLK-WT  
-DHT

HA-AR25Q  
FLAG-NLK-KN  
-DHT

$\alpha$ -AR

A

B

C

$\alpha$ -FLAG (NLK)

A'

B'

C'

merge

A''

B''

C''

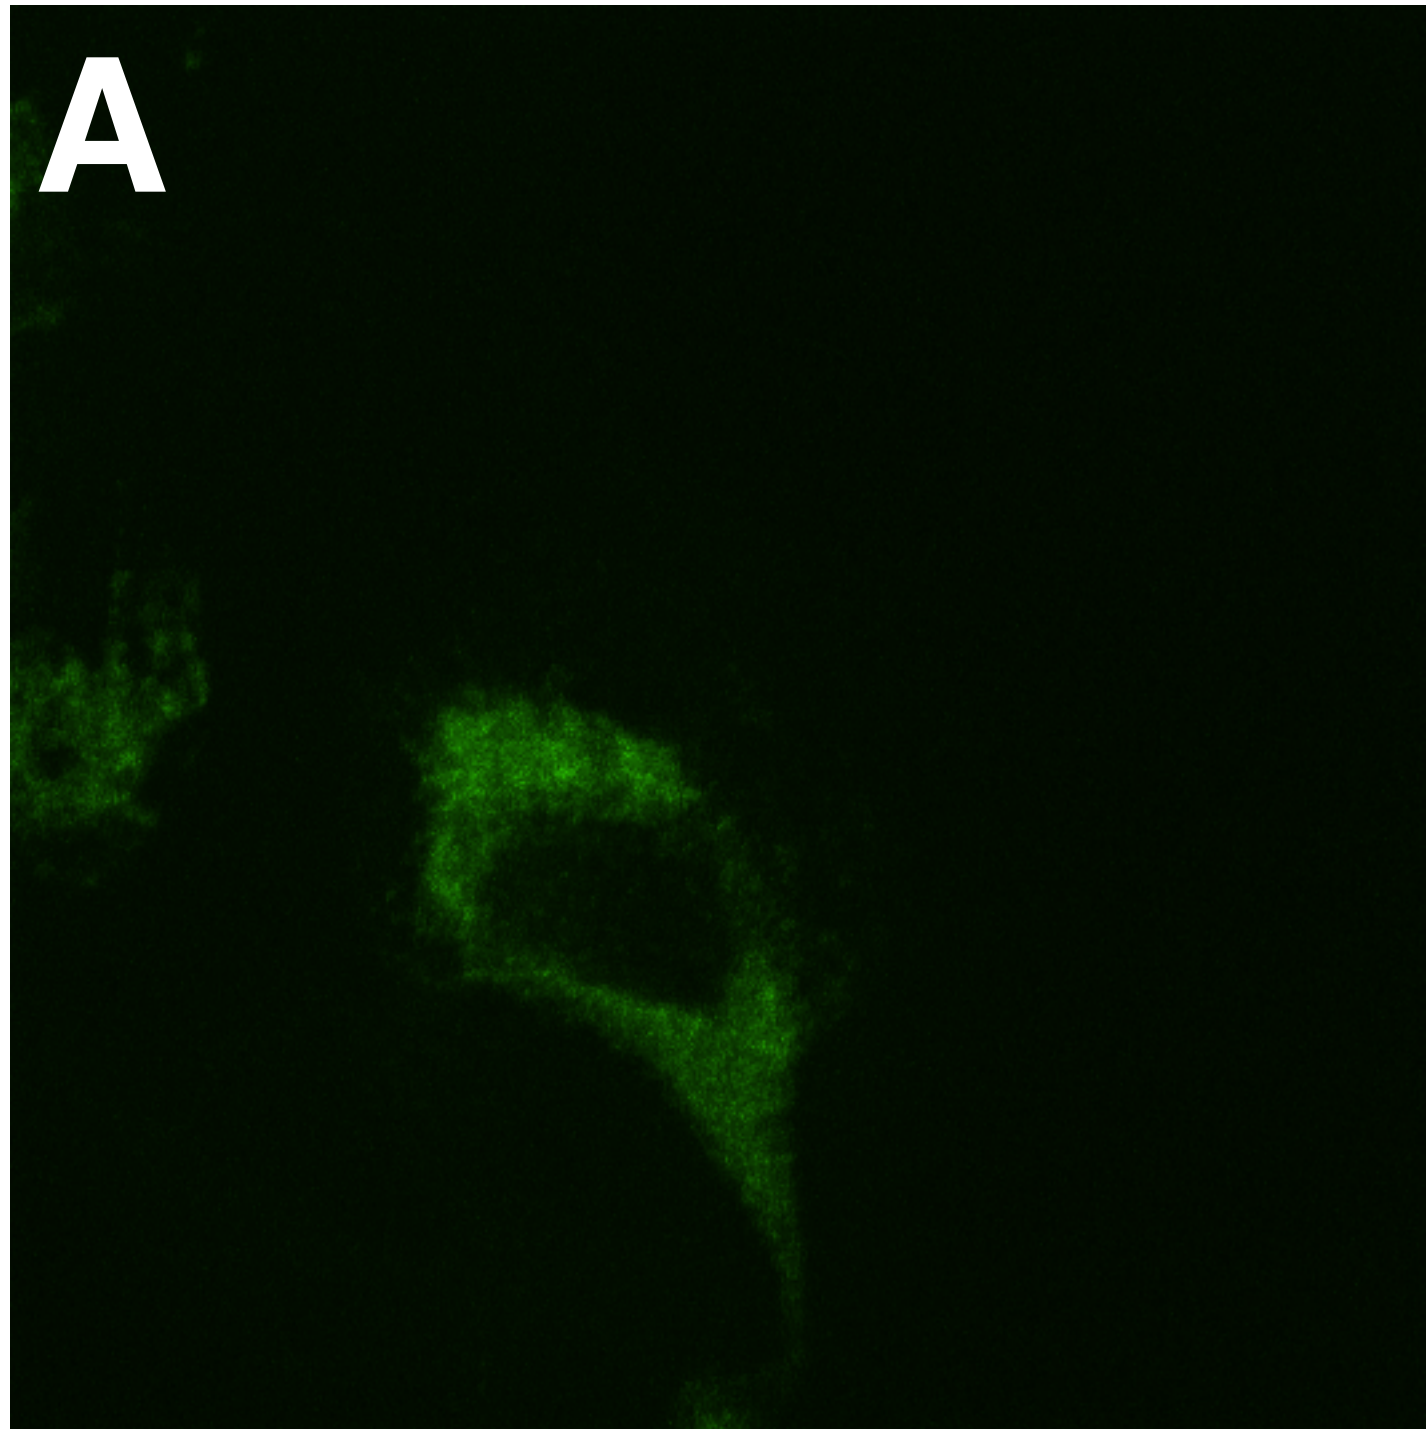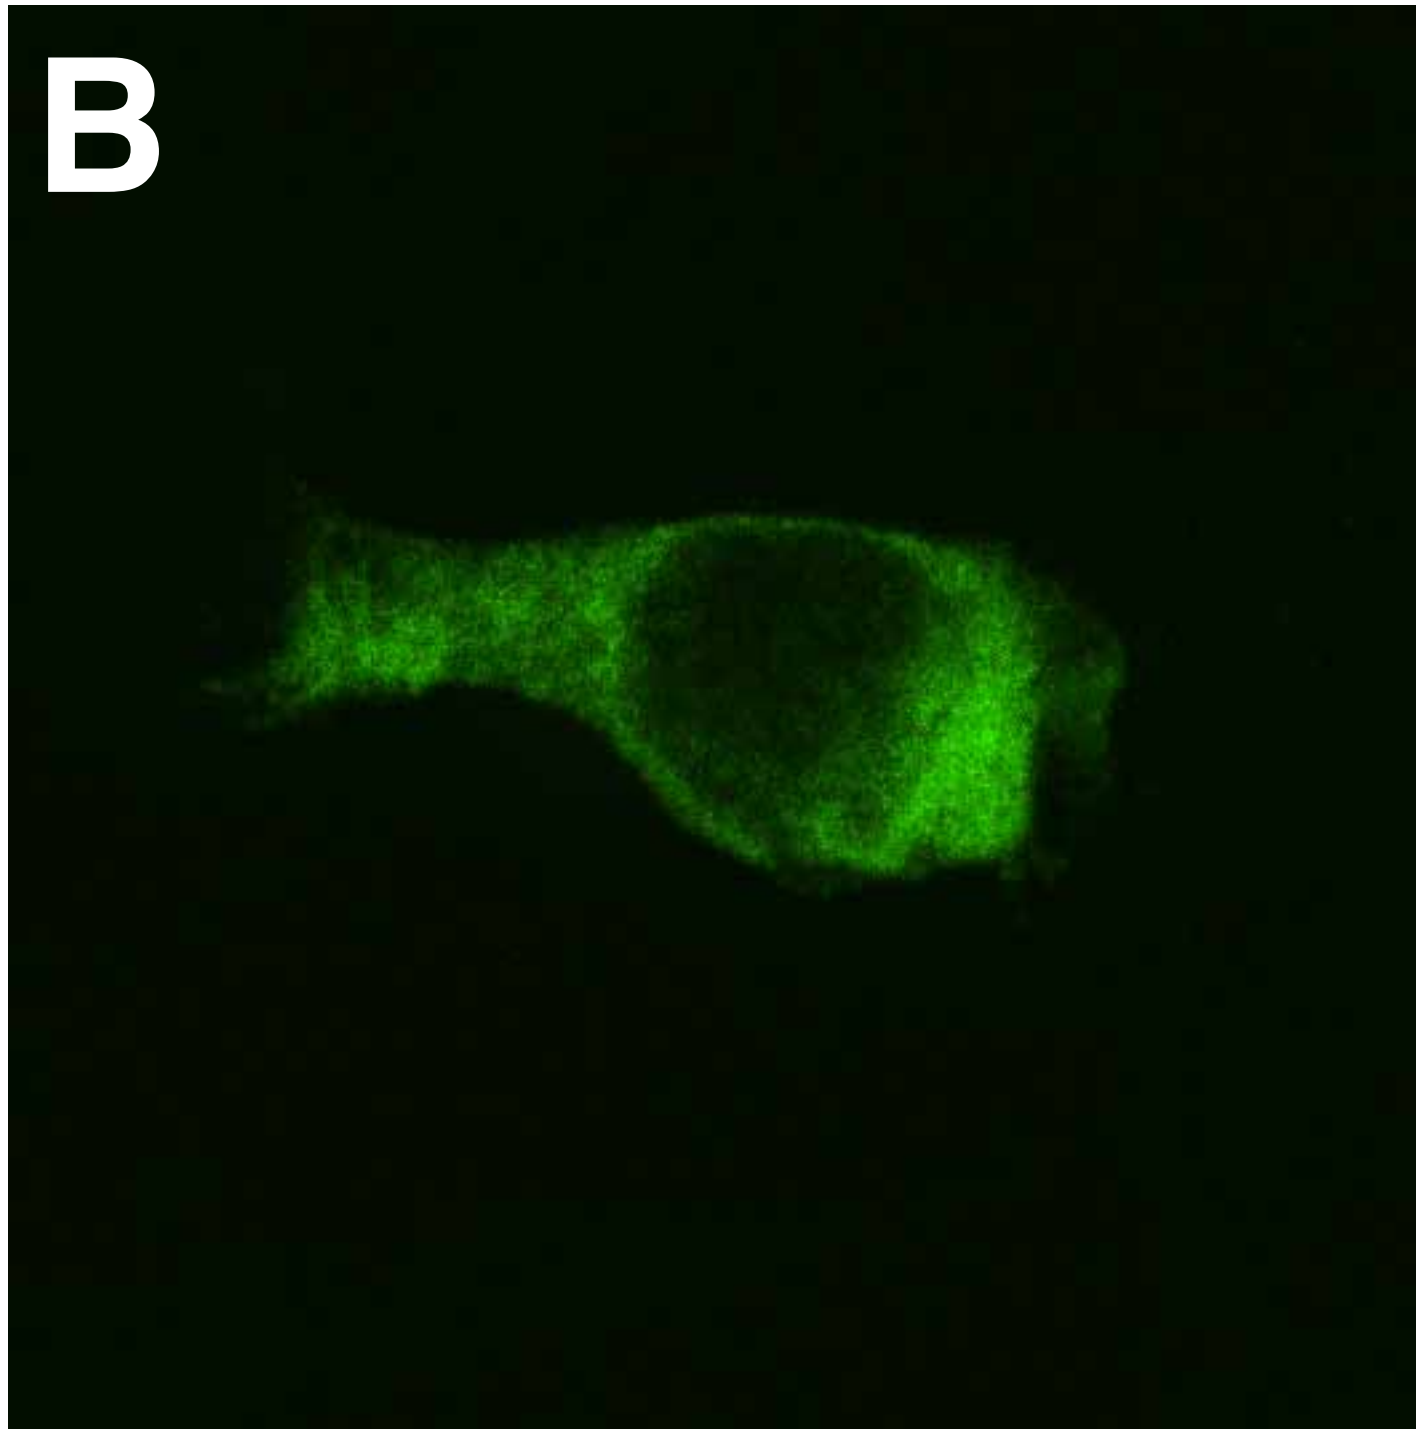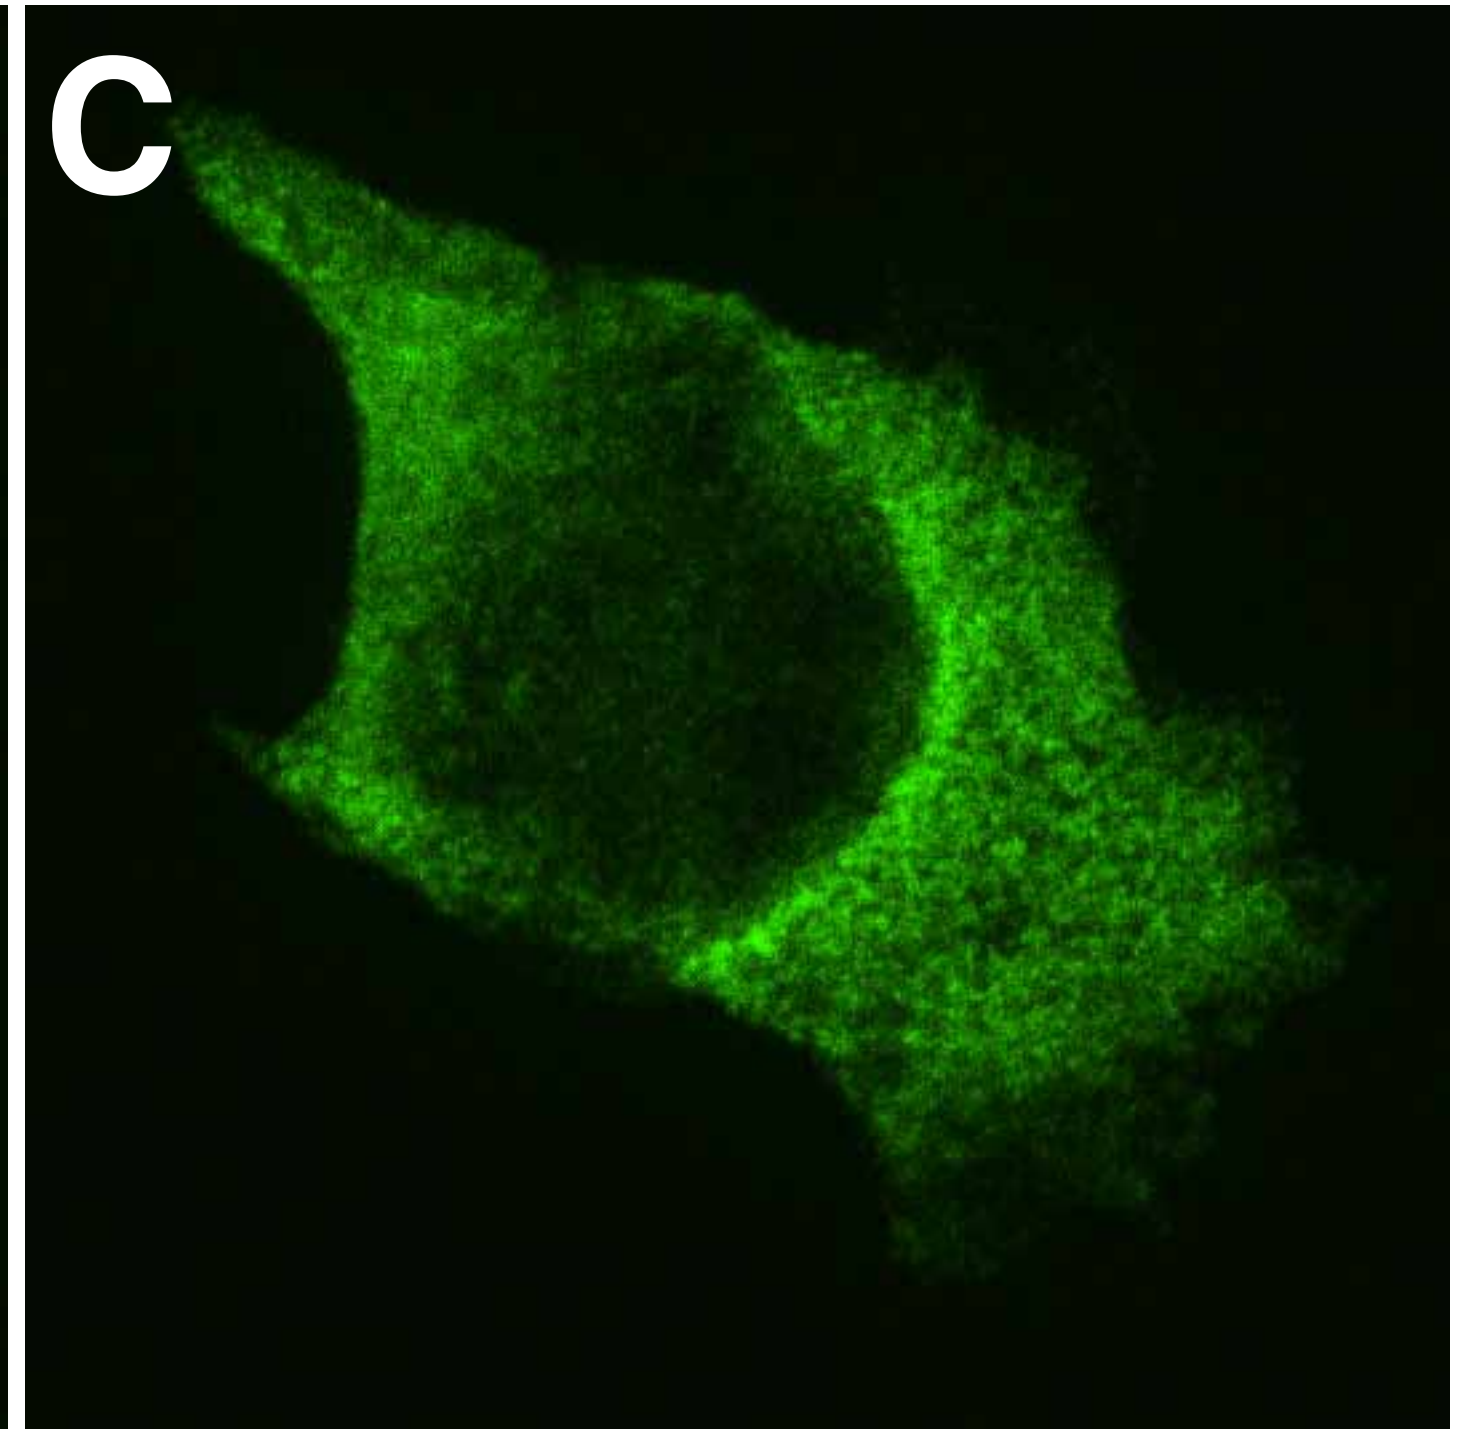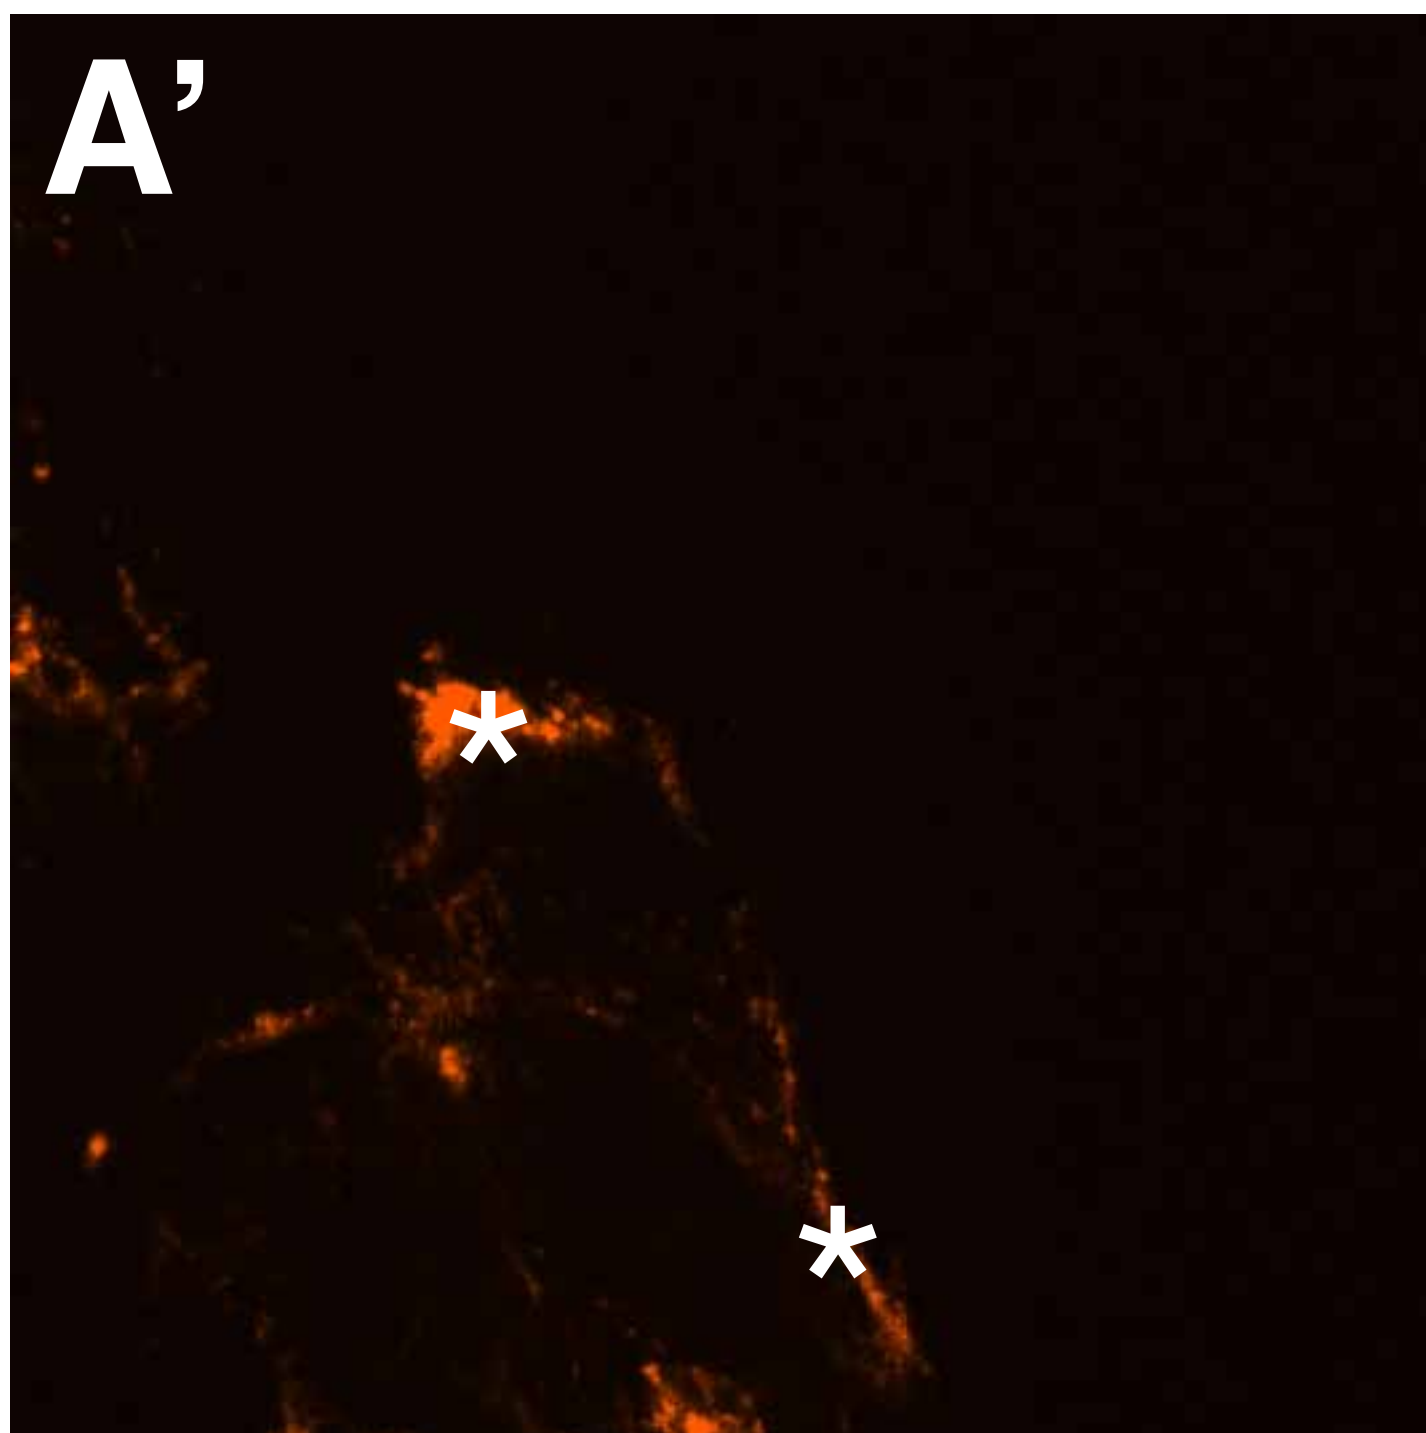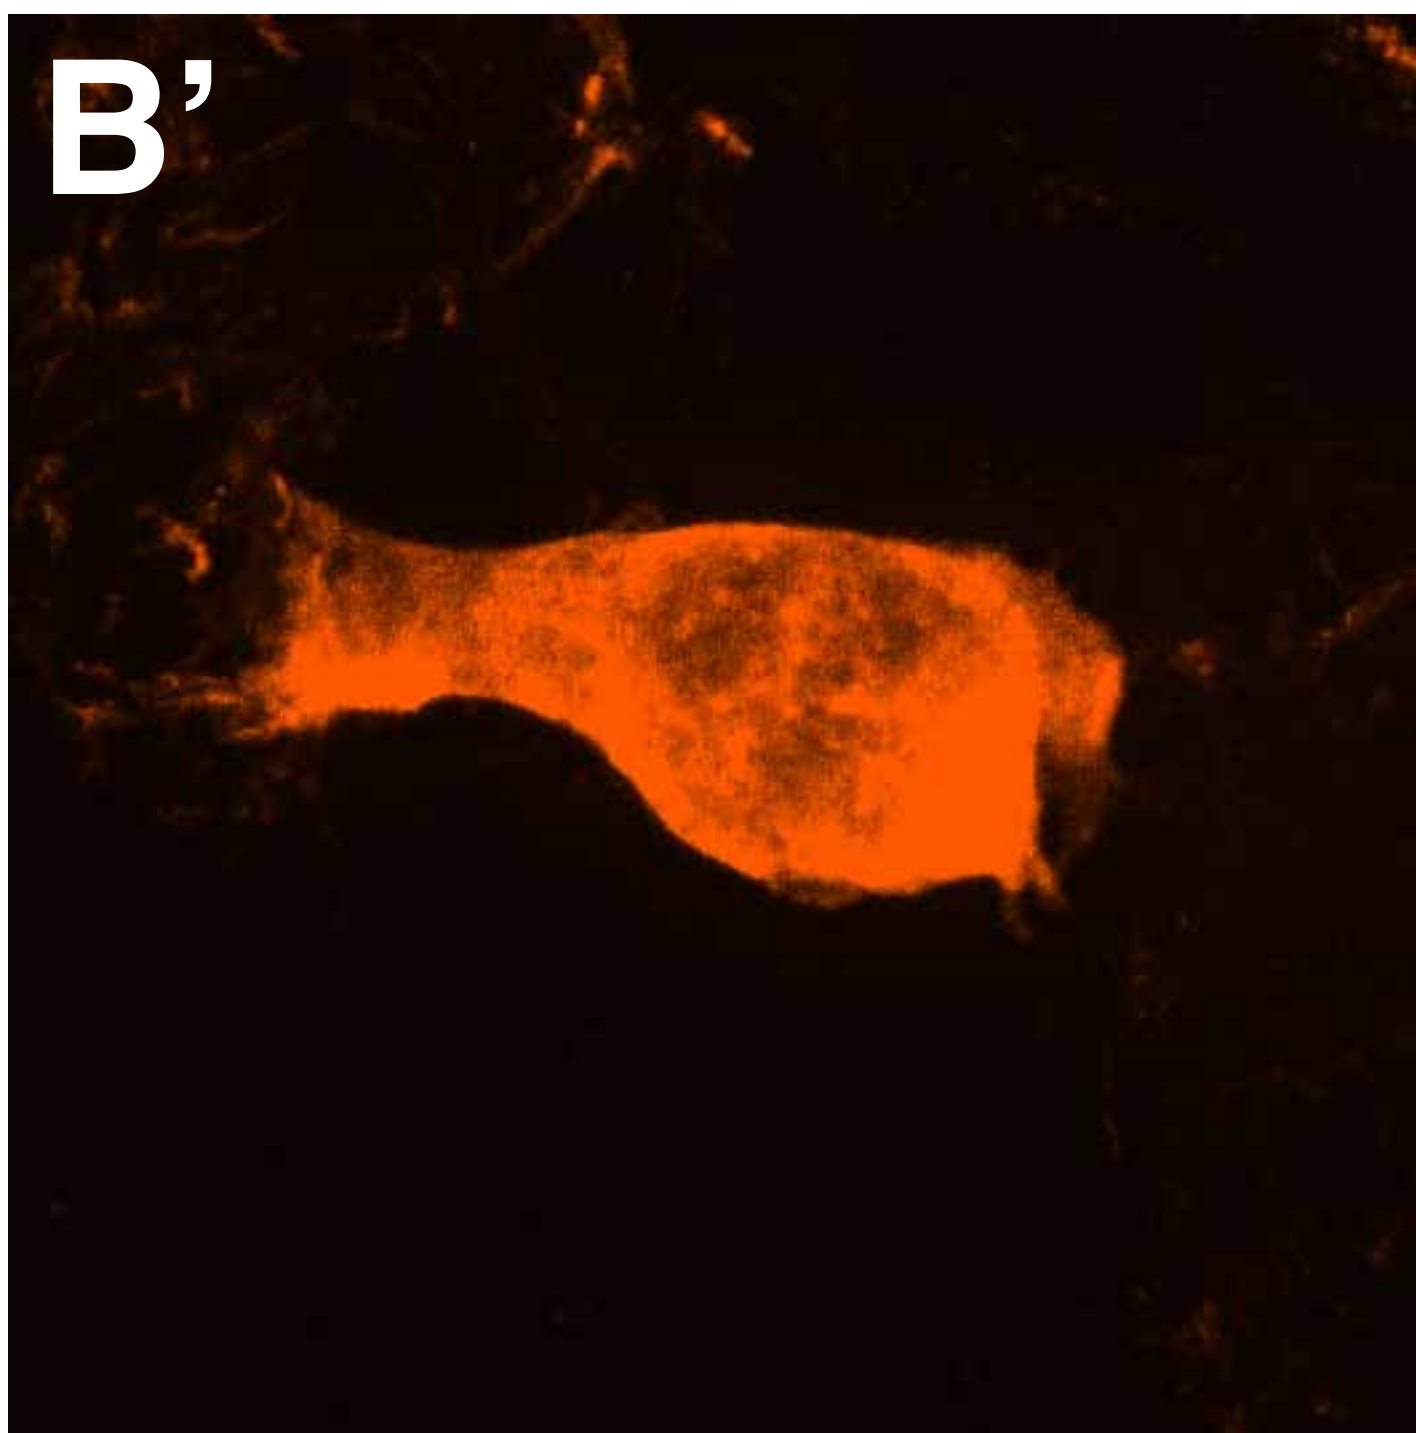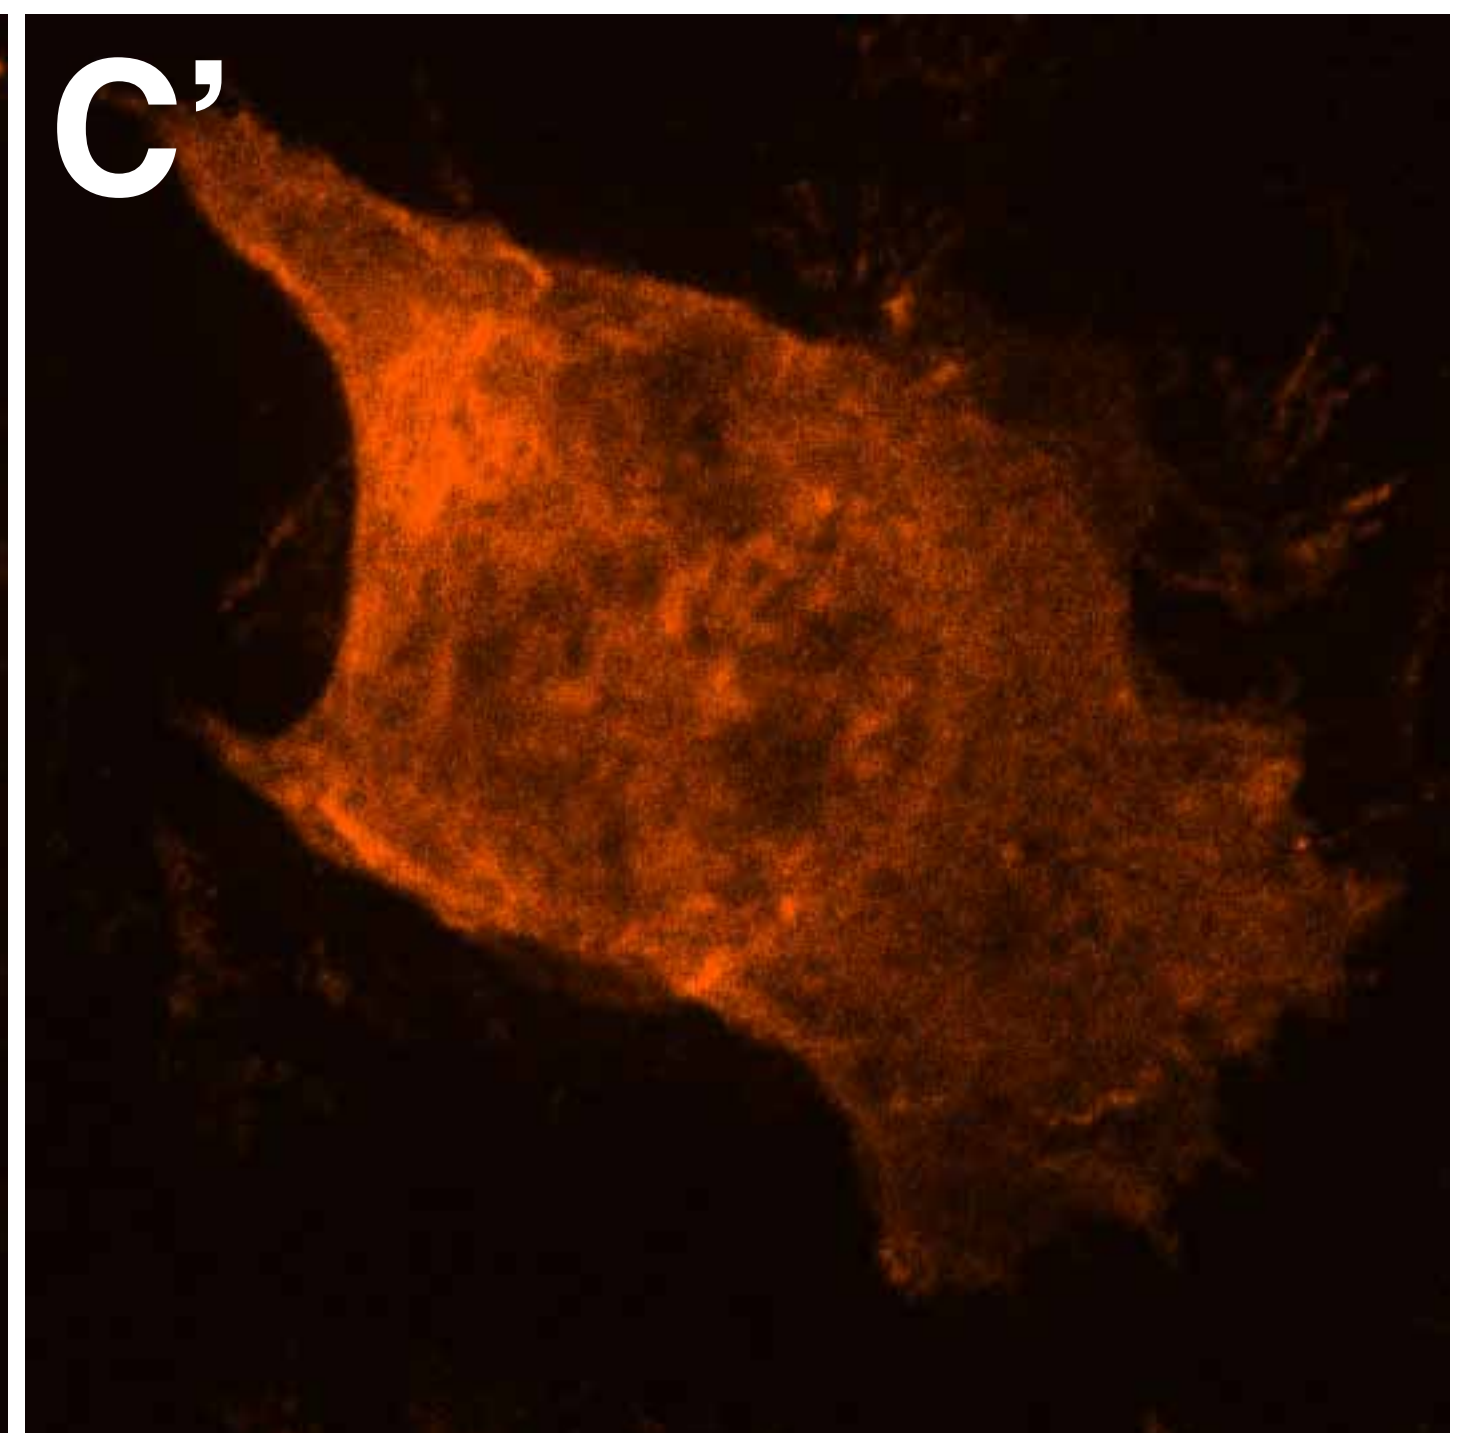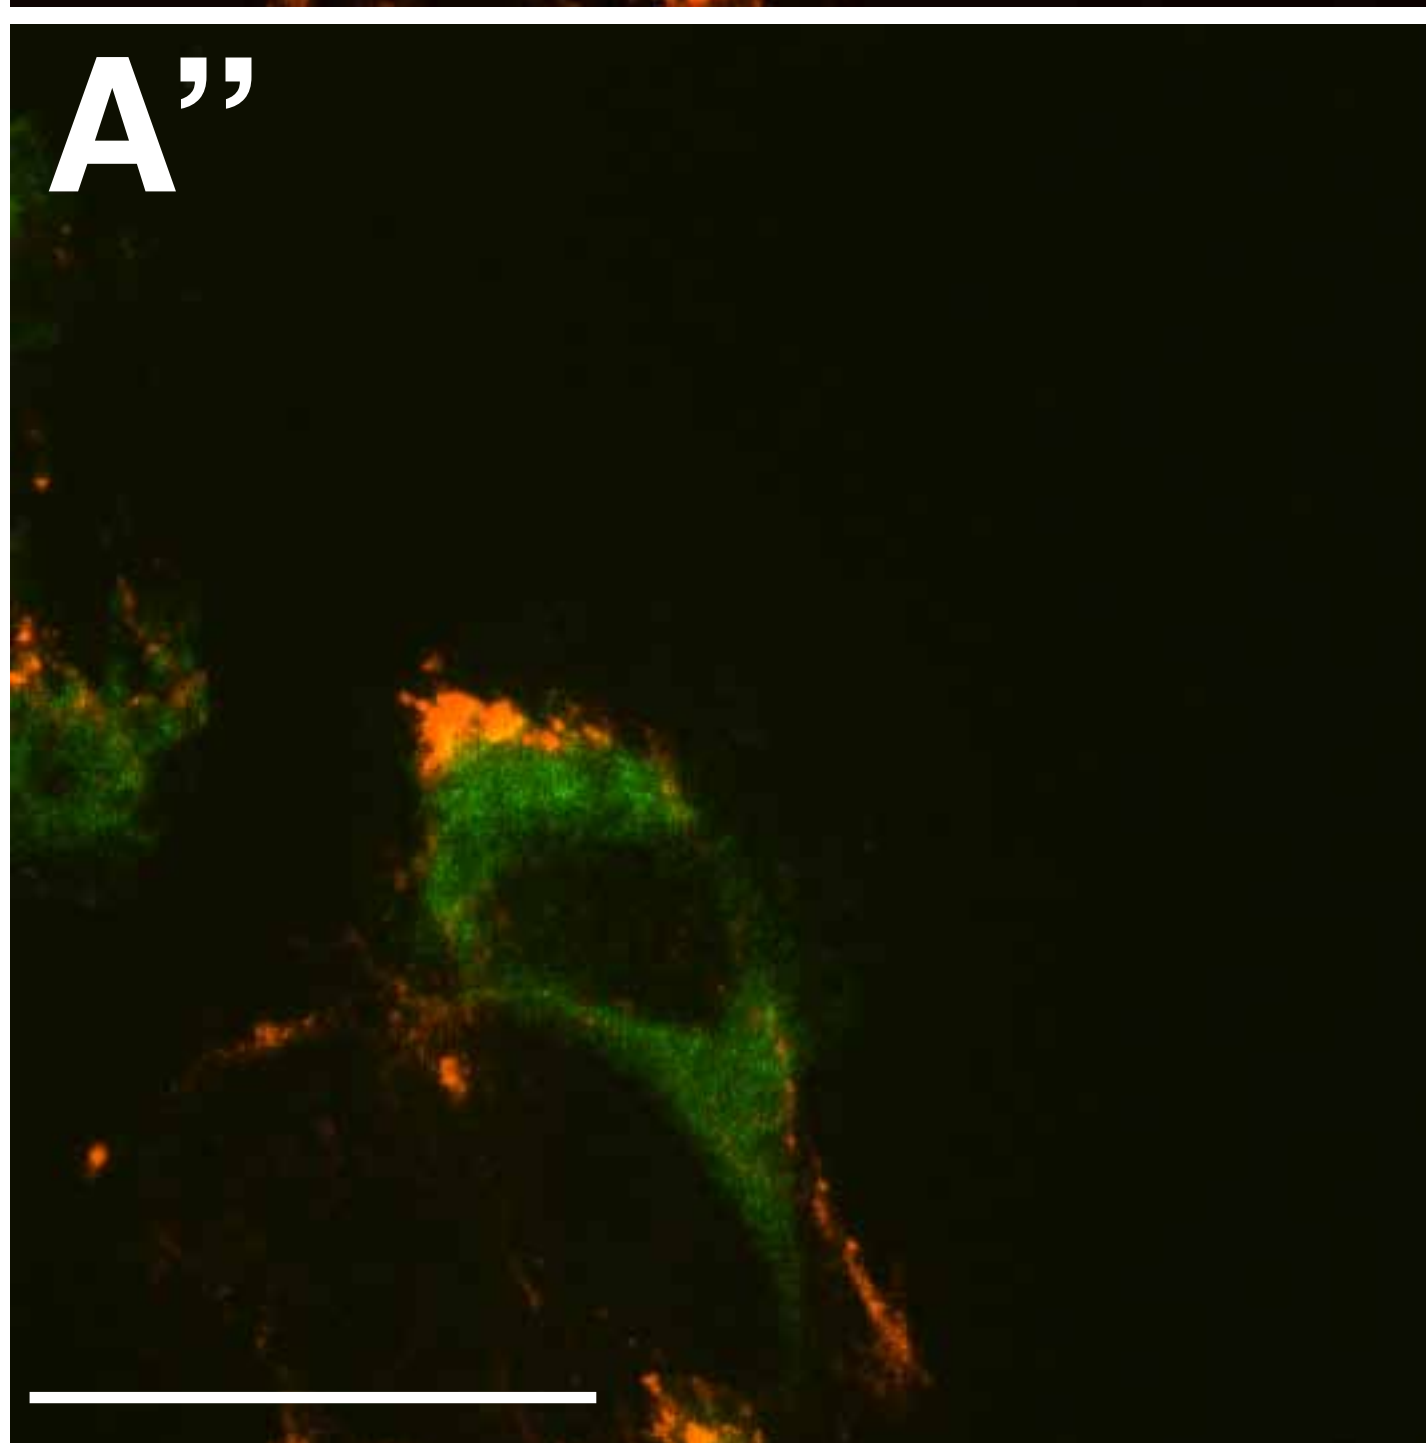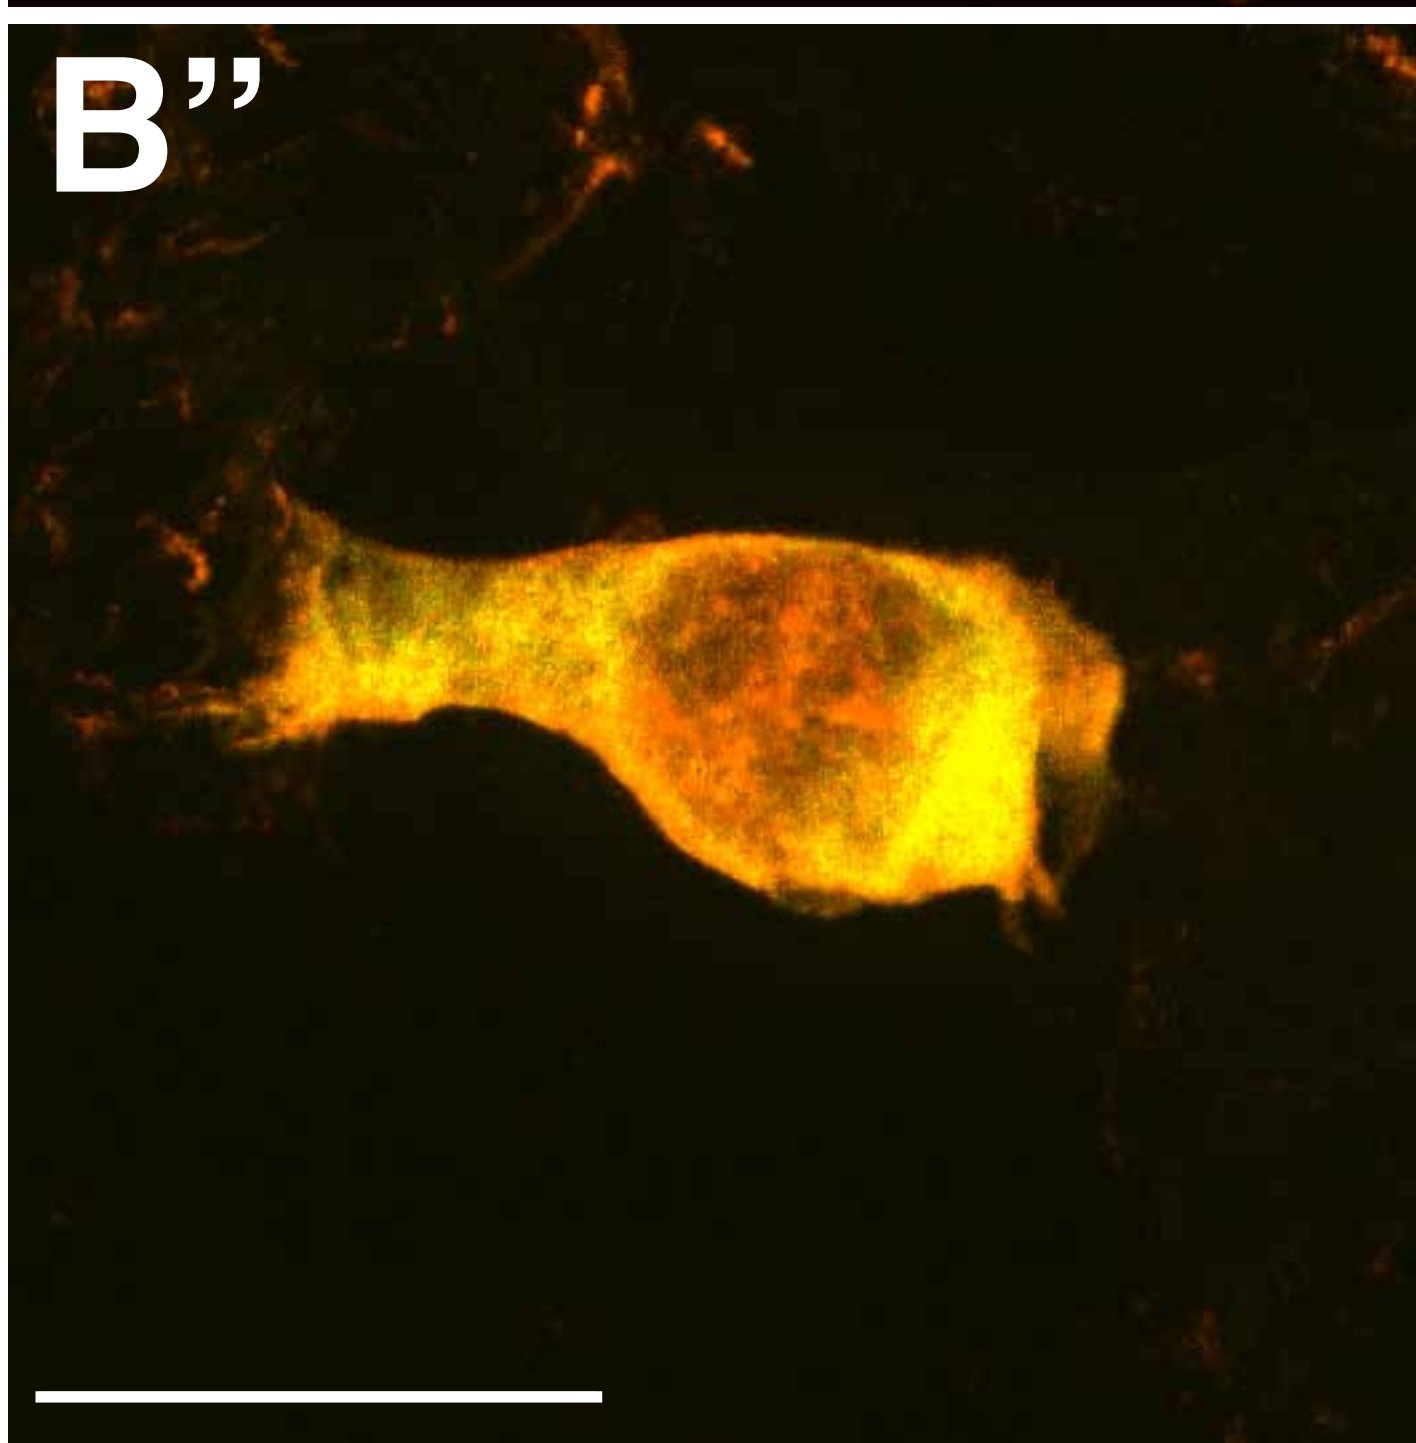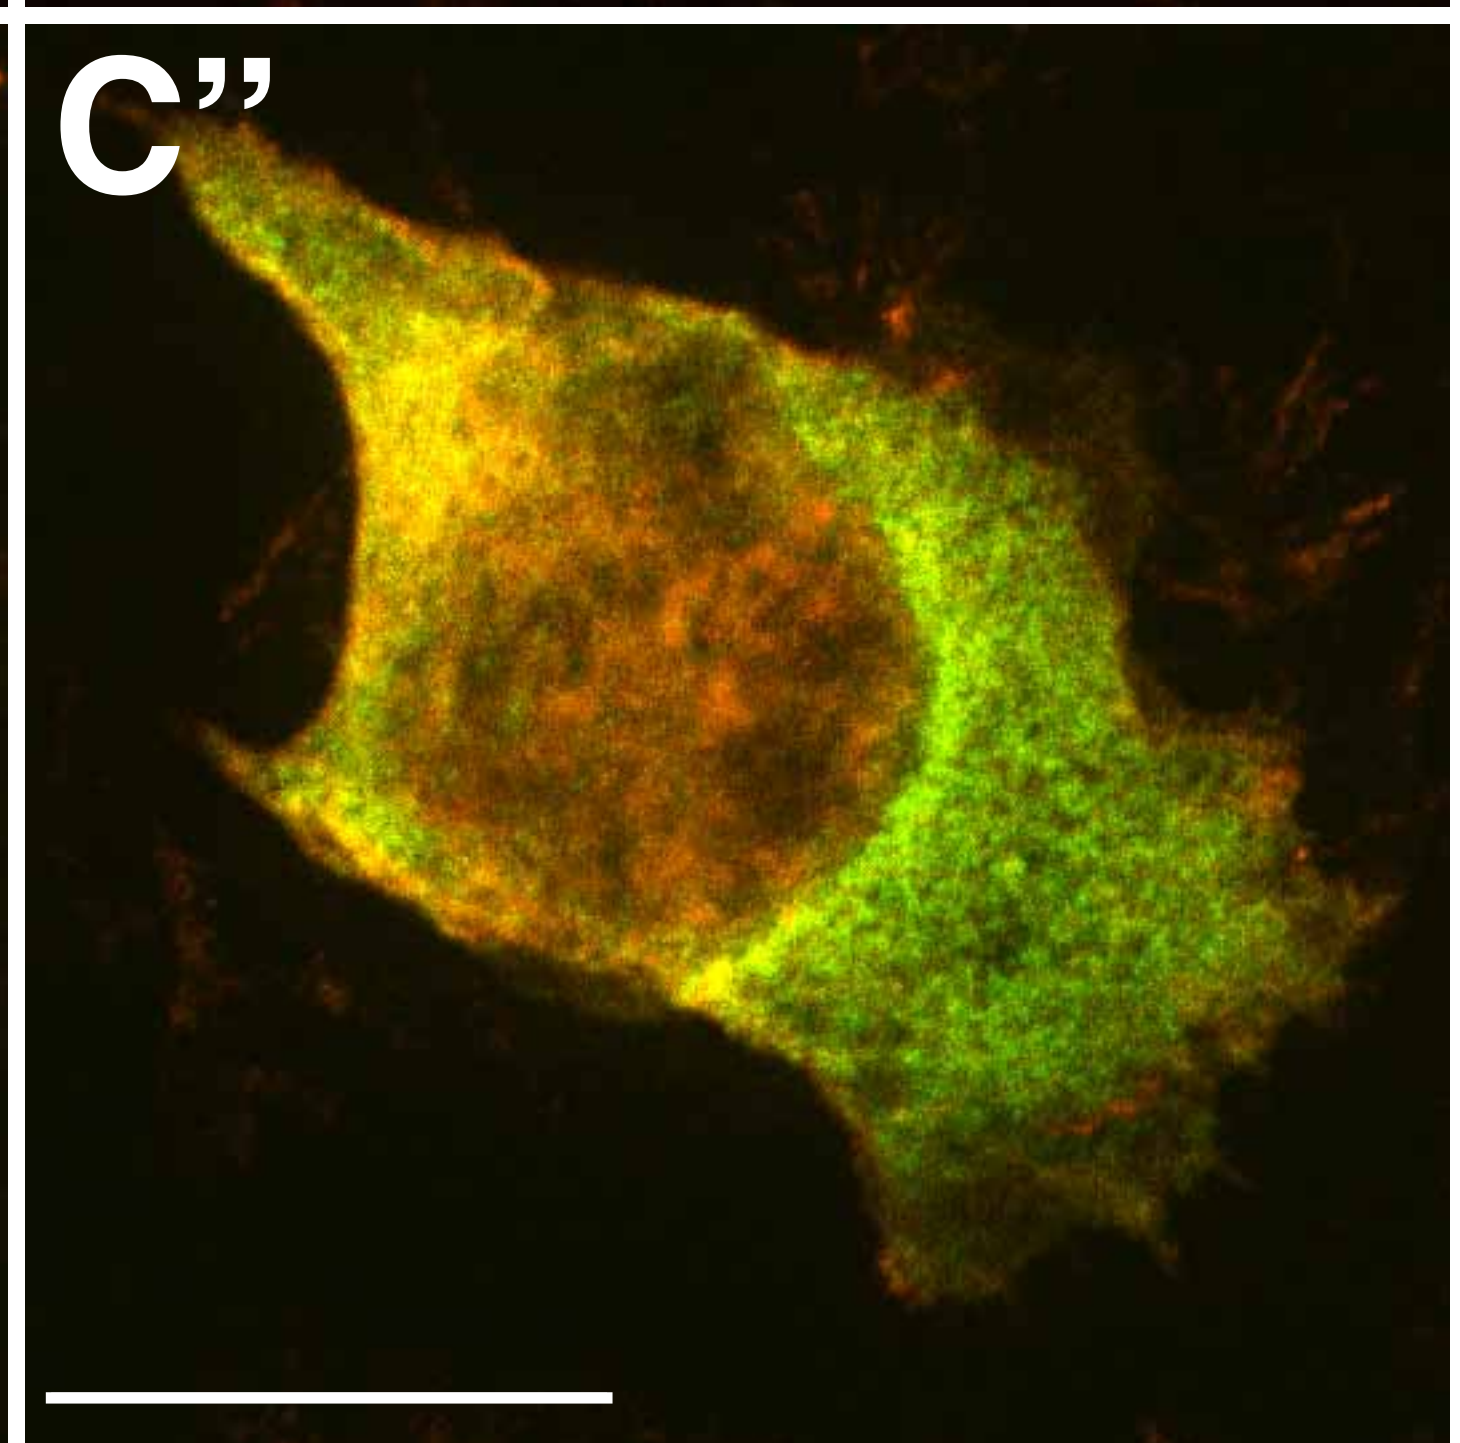

Supplement: supp [file elife_poa_e08493_Figure_1_figure_supplement_2.pdf › elife_poa_e08493_Figure_1_figure_supplement_2.pdf]
