# Supplementary material for: Nemo-like kinase is a novel regulator of spinal and bulbar muscular atrophy
Source: eLife journal article supplement (doi:10.7554/elife.08493), 2015-08-26

HA-AR120Q  
+pcDNA3.1  
+DHT

**A**

$\alpha$ -AR

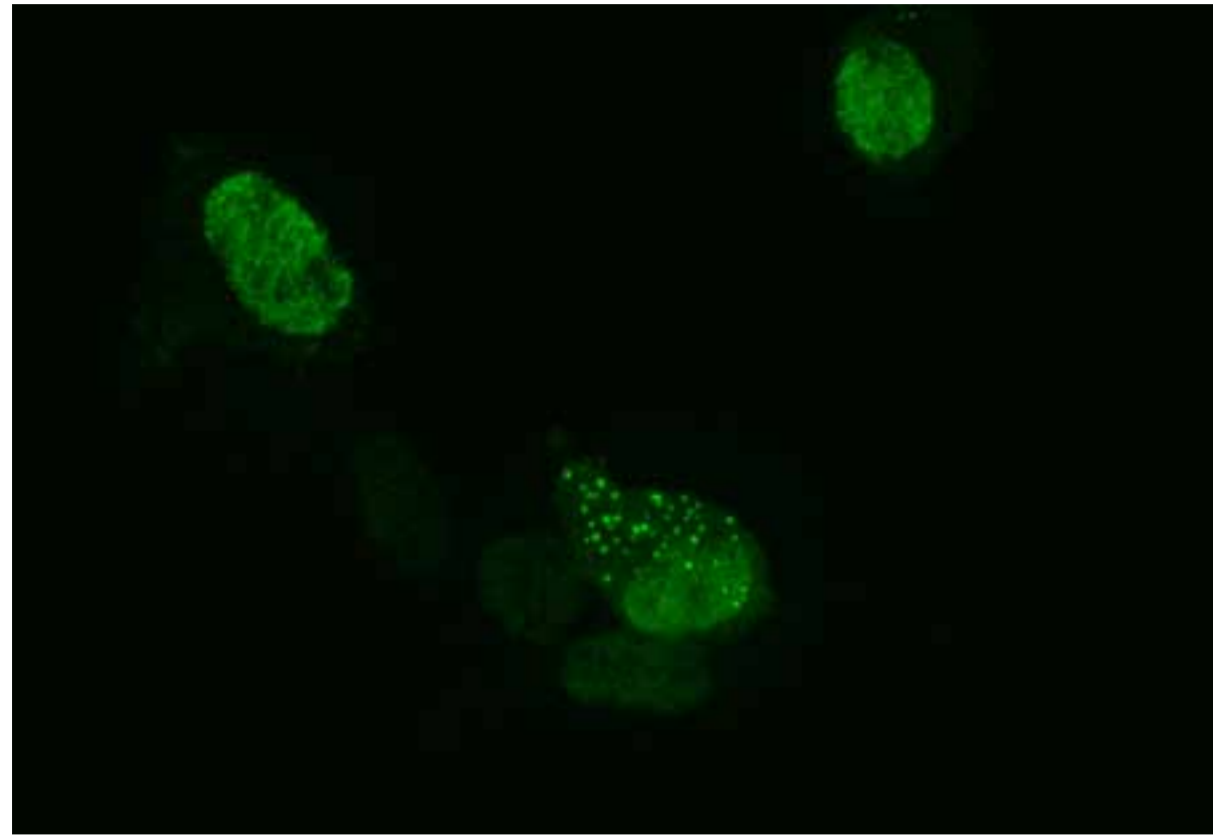

HA-AR120Q-S81A  
+pcDNA3.1  
+DHT

**B**

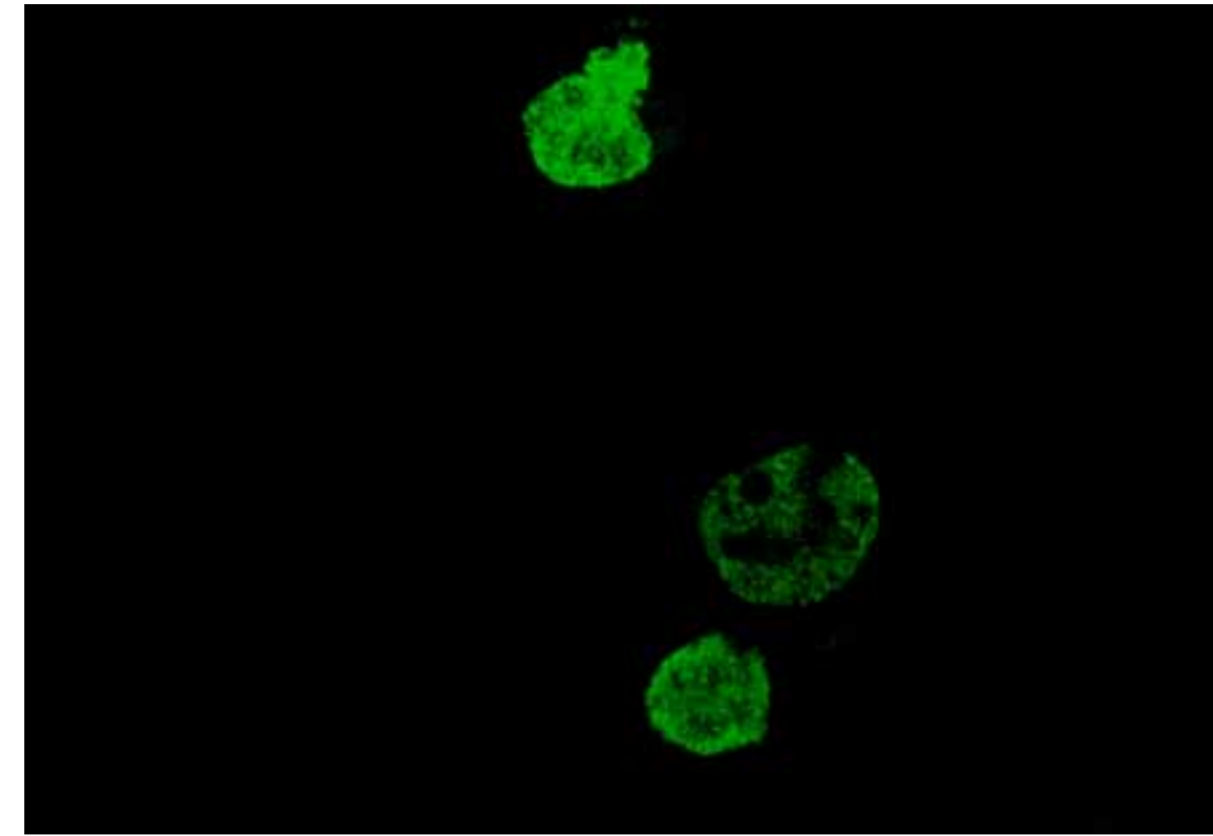

HA-AR120Q  
+FLAG-NLK-WT  
+DHT

**C**

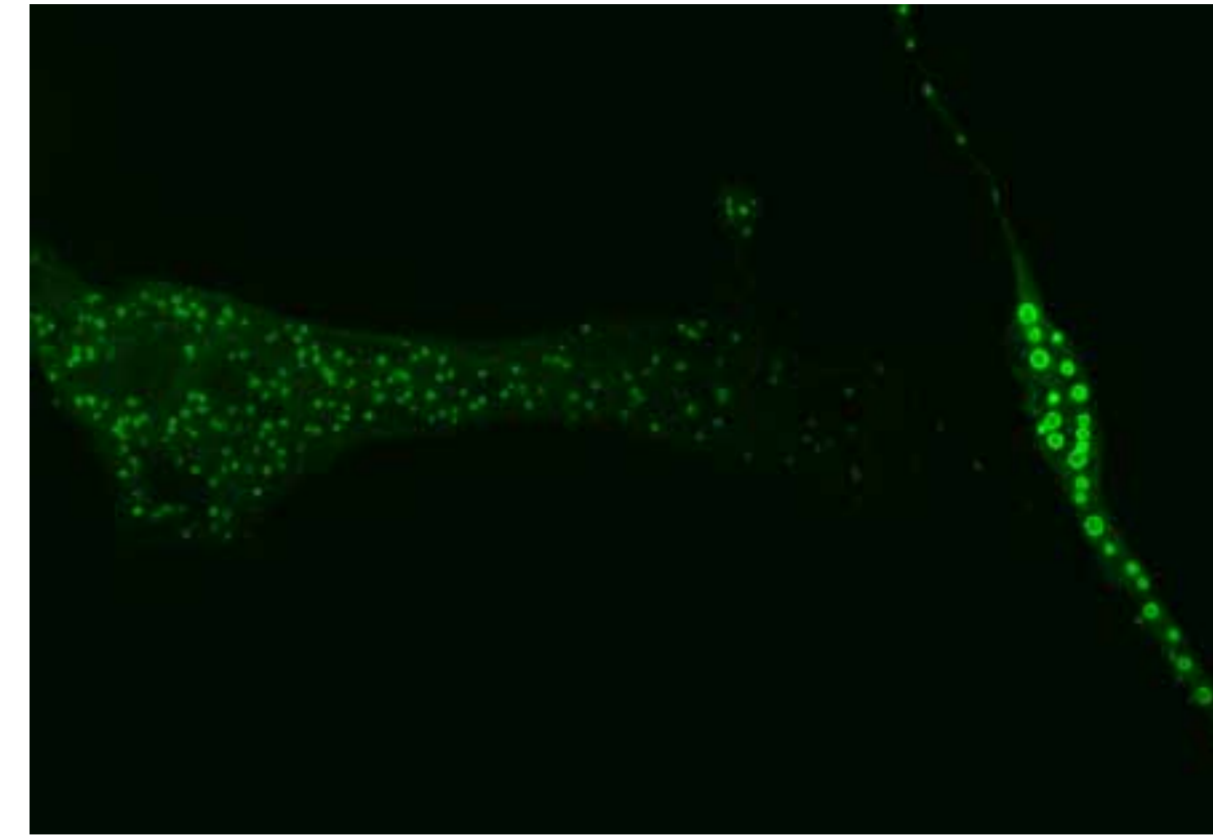

HA-AR120Q-S81A  
+FLAG-NLK-WT  
+DHT

**D**

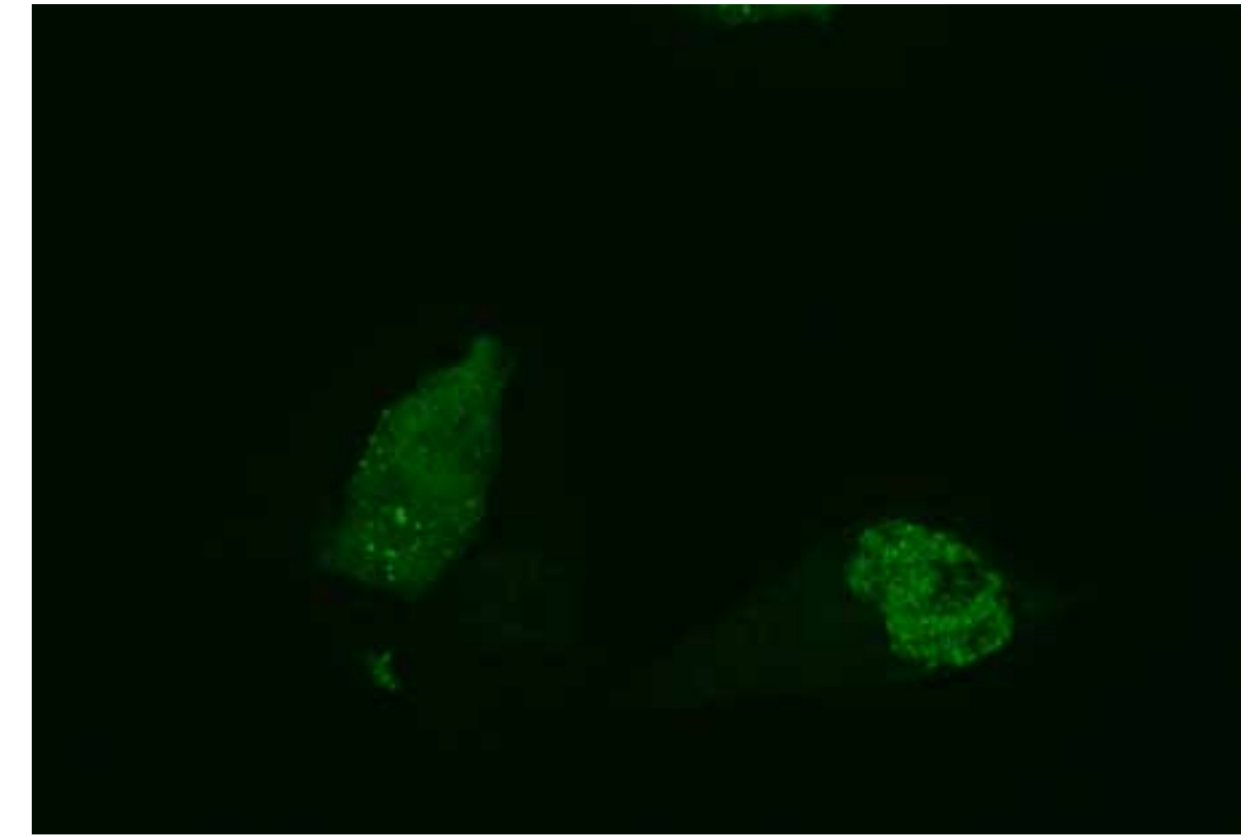

**A'**

$\alpha$ -FLAG

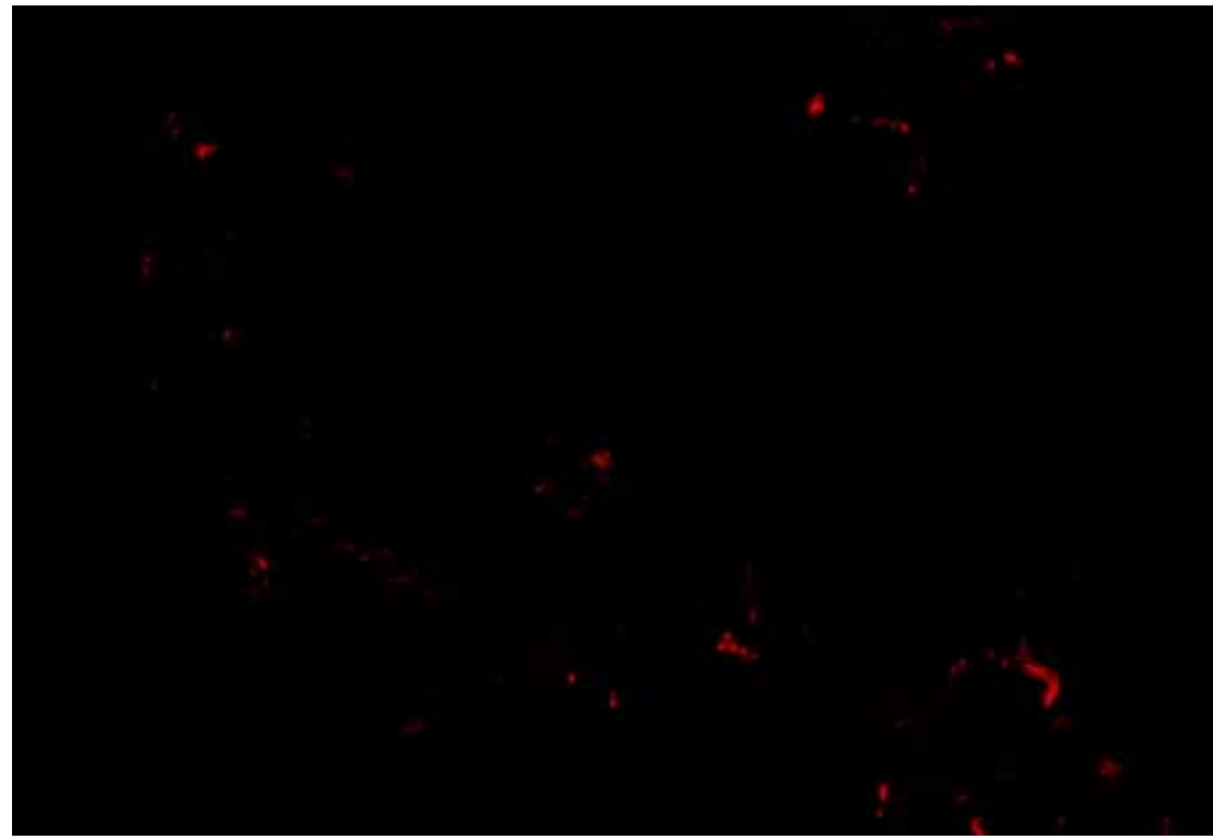

**B'**

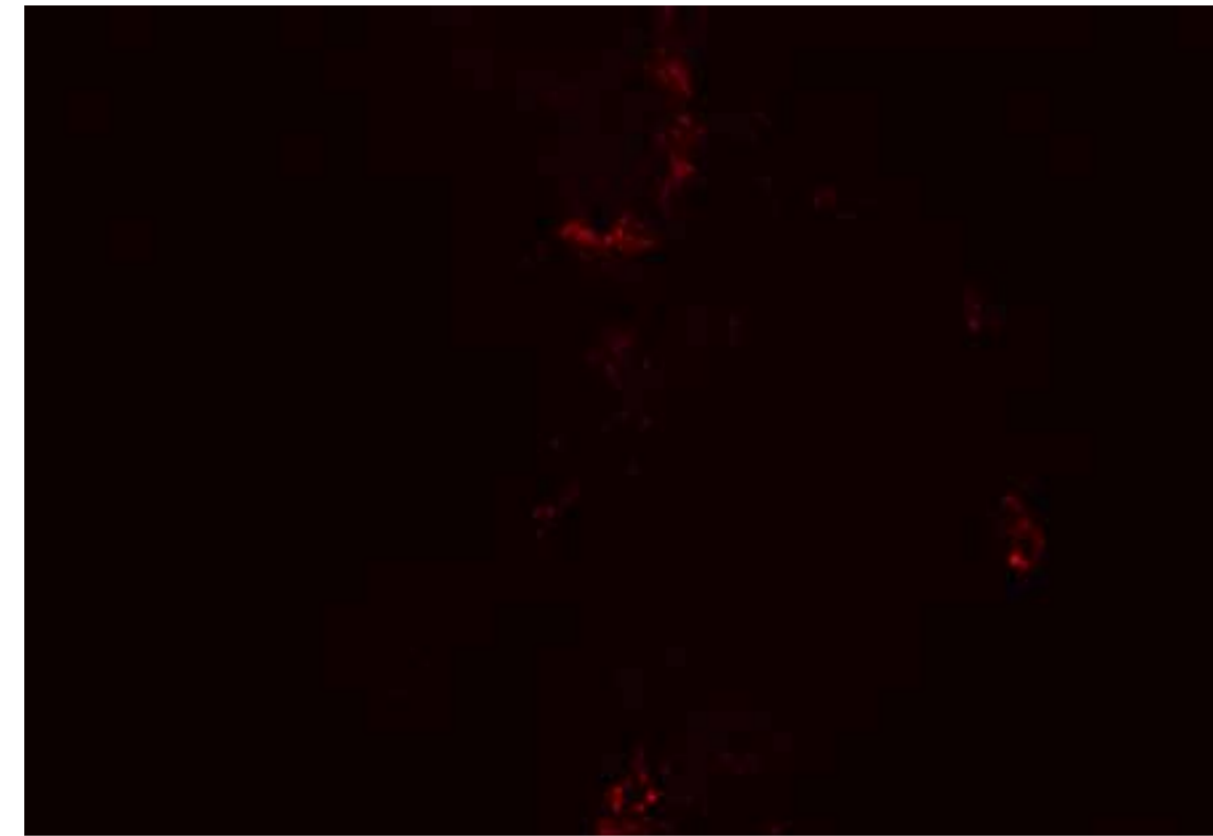

**C'**

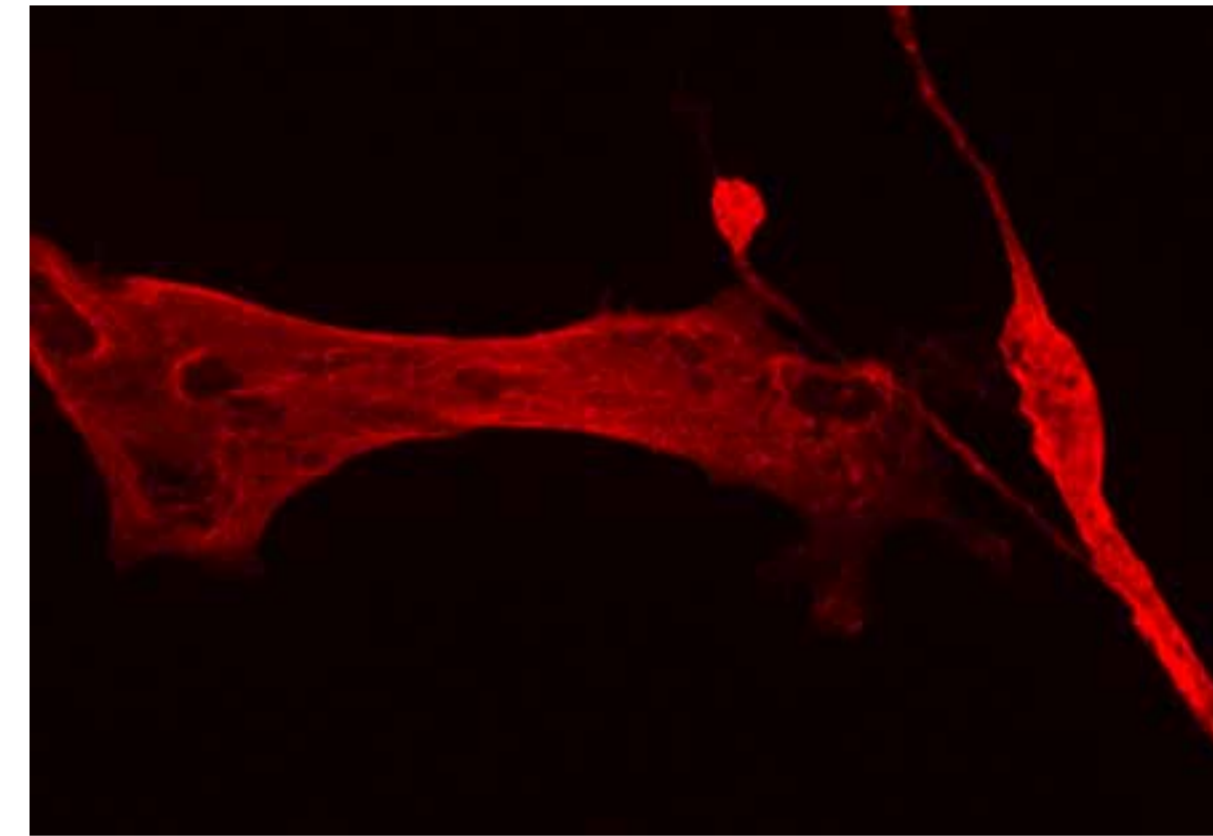

**D'**

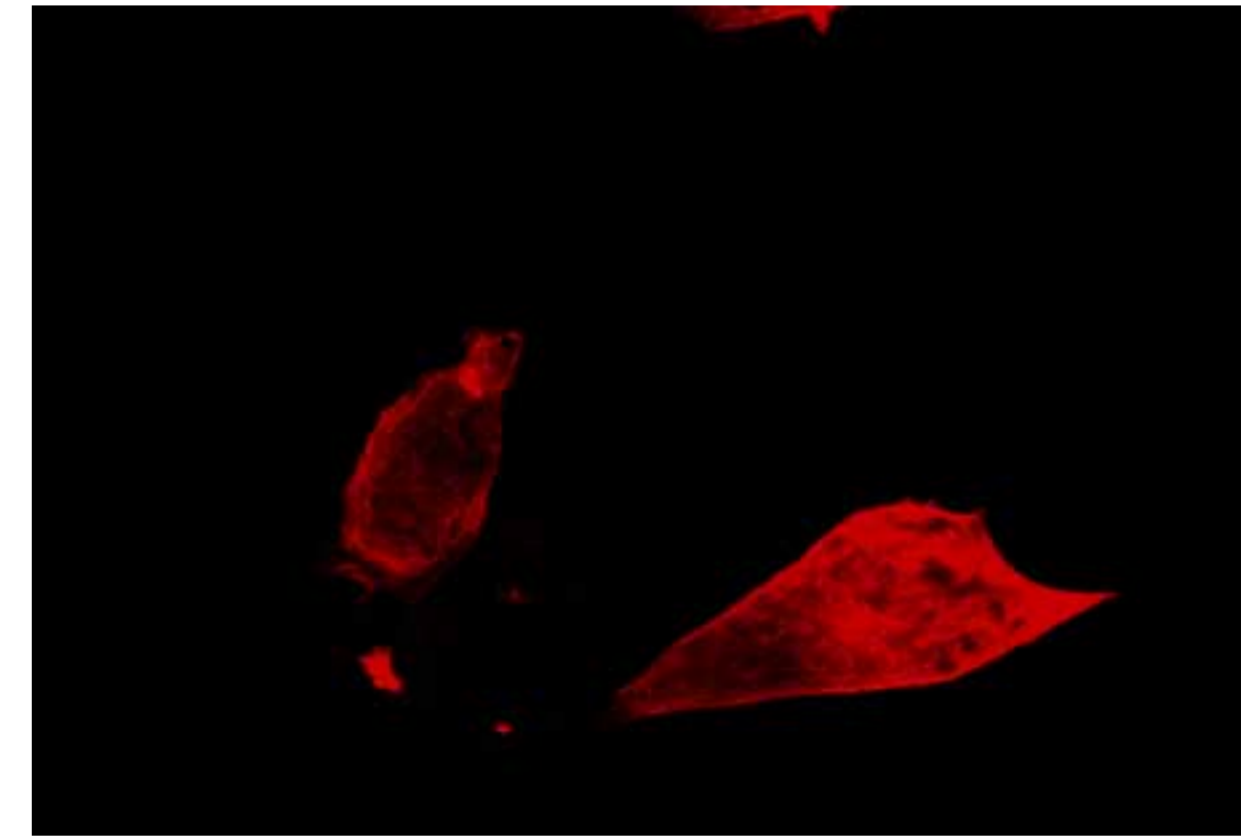

**A''**

merge

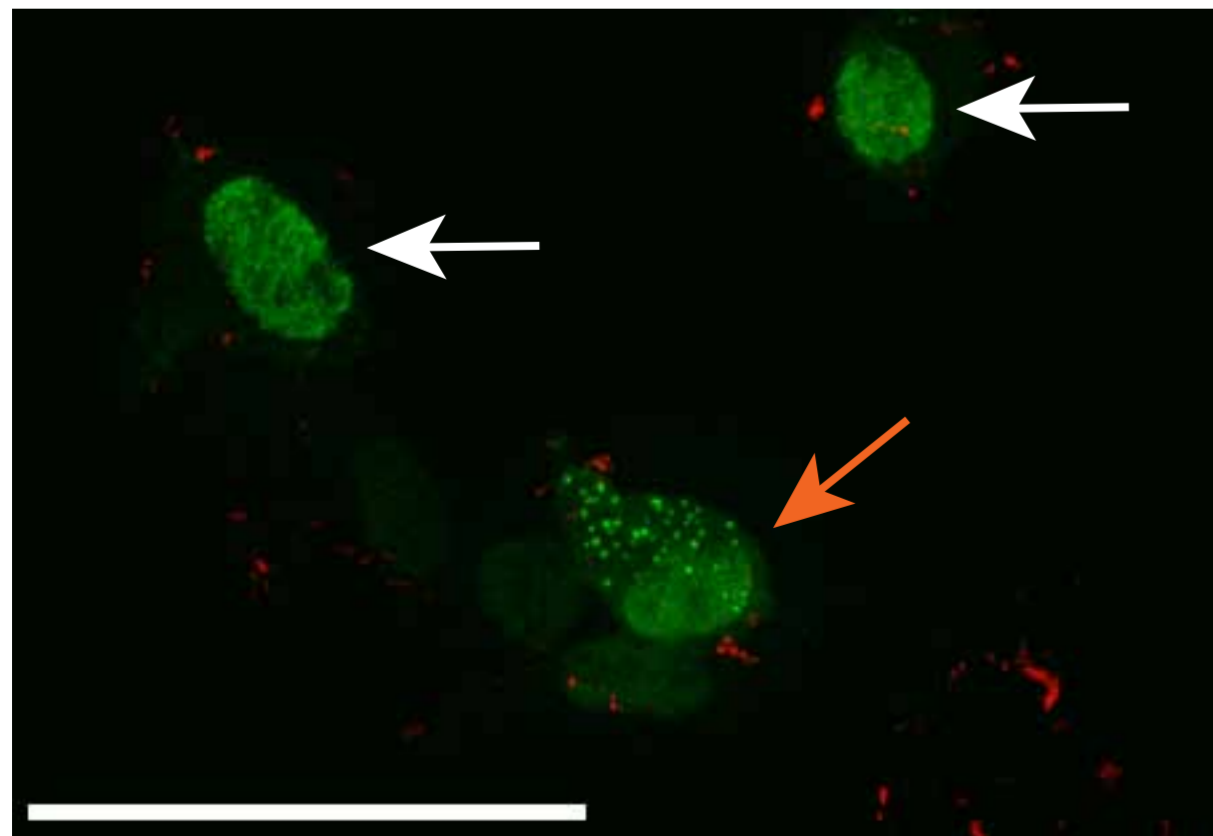

**B''**

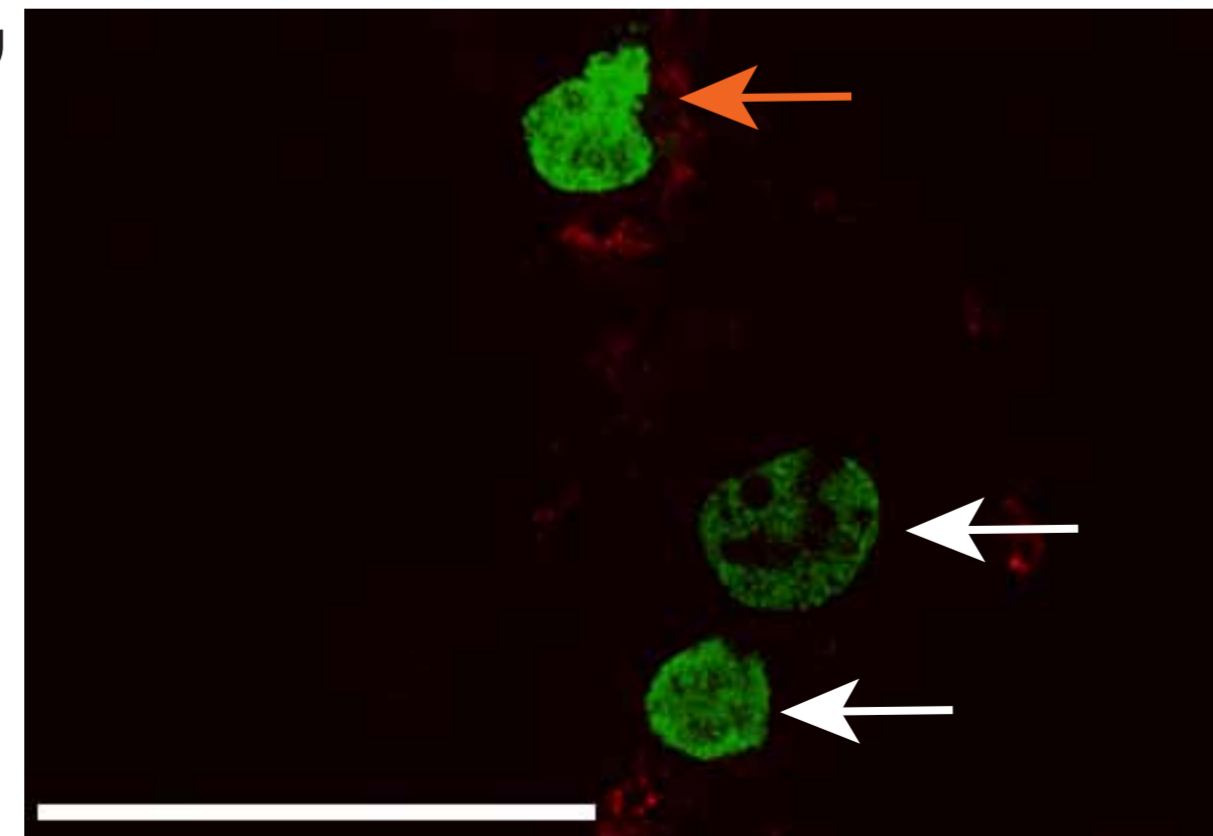

**C''**

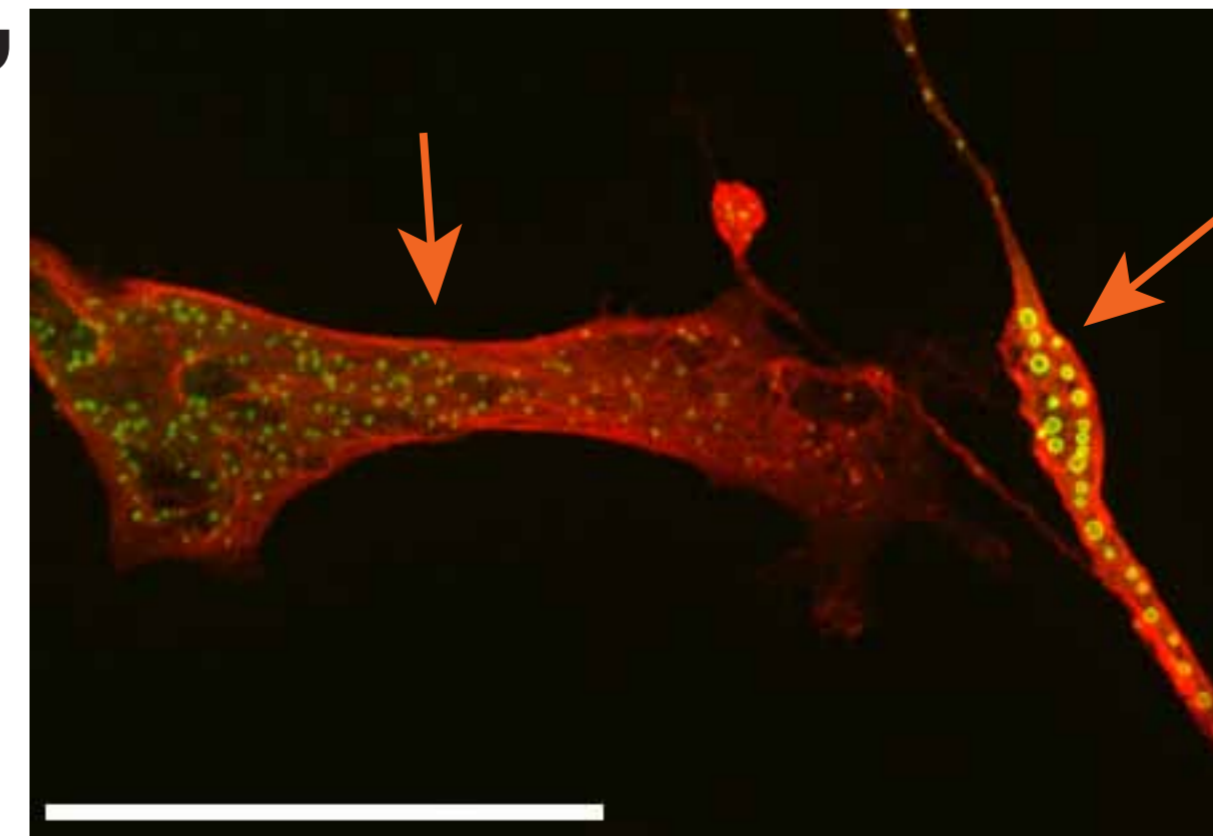

**D''**

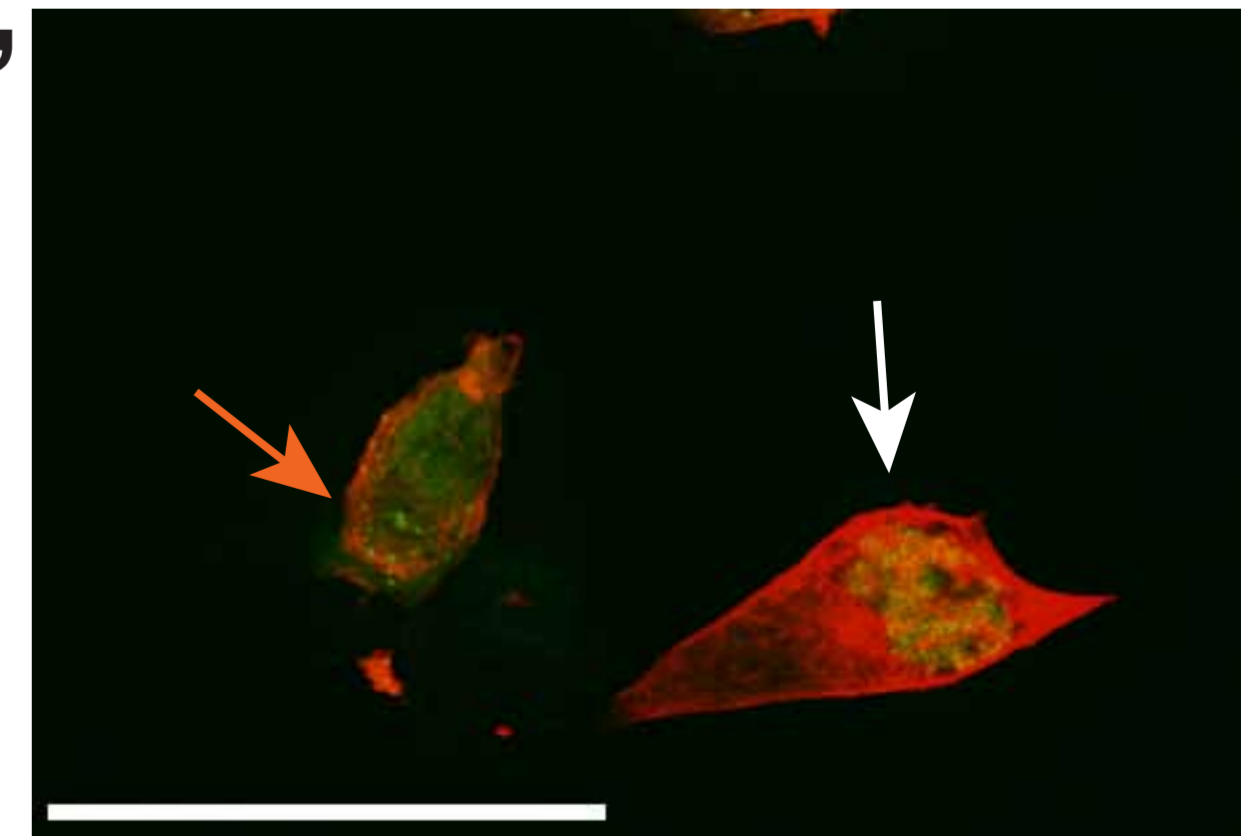

Supplement: supp [file elife_poa_e08493_Figure_10_figure_supplement_1.pdf › elife_poa_e08493_Figure_10_figure_supplement_1.pdf]
