# Supplementary figures and images for: Nemo-like kinase is a novel regulator of spinal and bulbar muscular atrophy
Source: eLife journal article supplement (doi:10.7554/elife.08493), 2015-08-26

**A**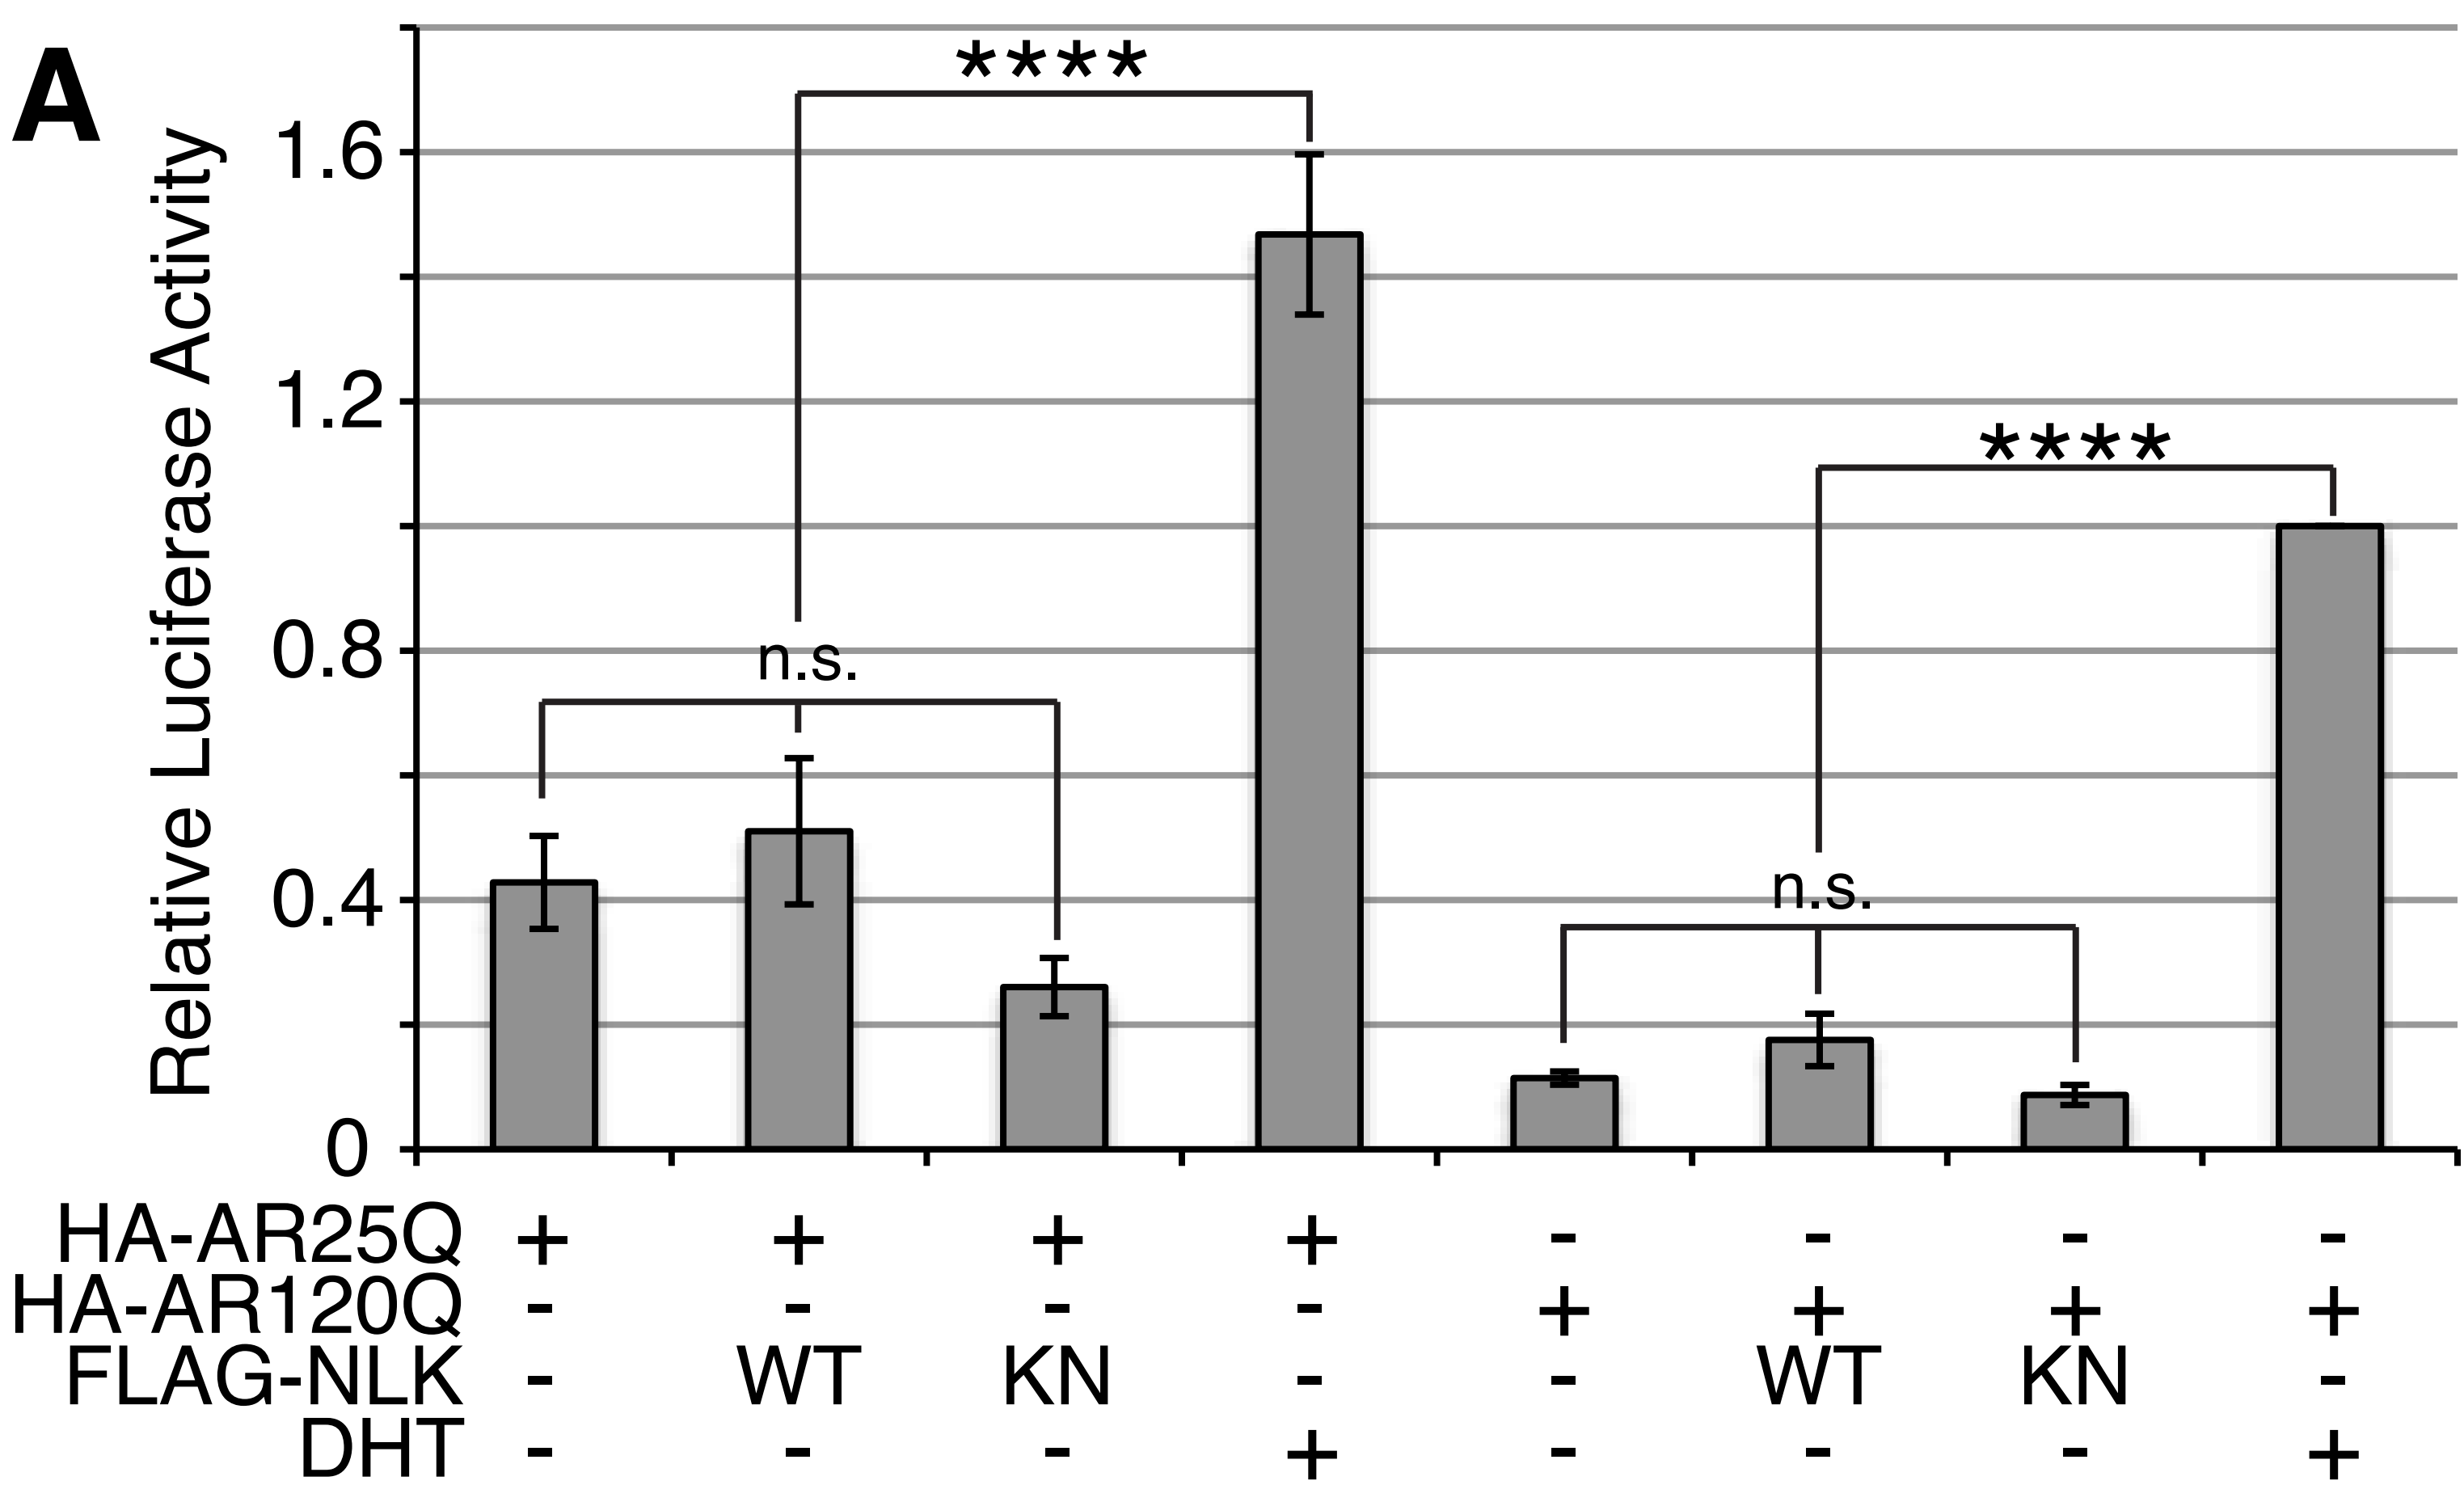**B**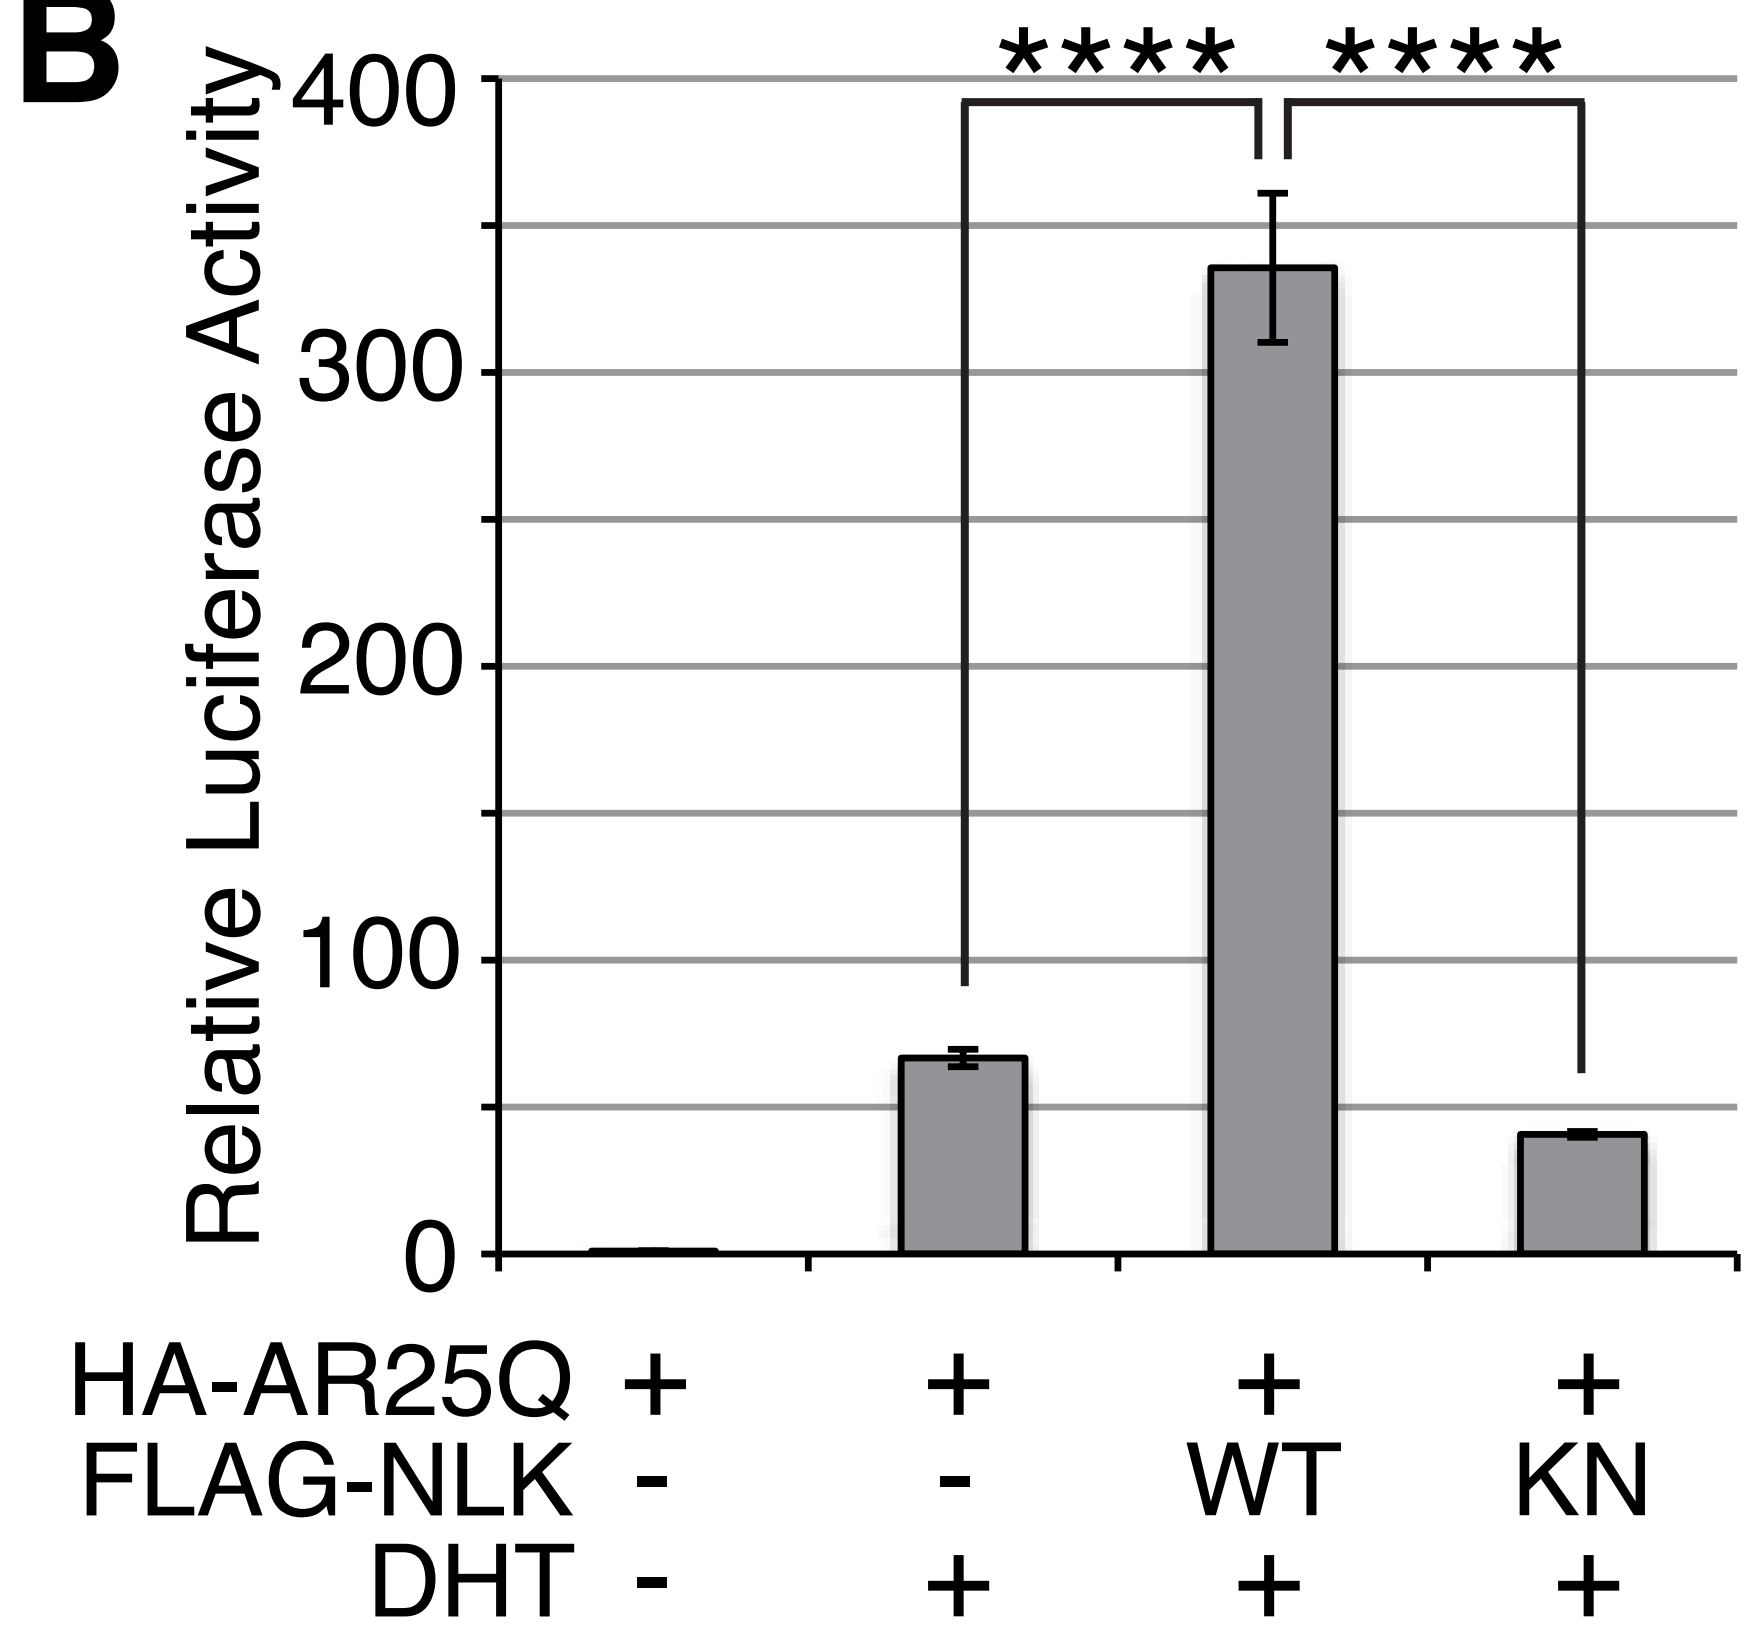

Supplement: supp [file elife_poa_e08493_Figure_11_figure_supplement_1.pdf › elife_poa_e08493_Figure_11_figure_supplement_1.pdf]

**A**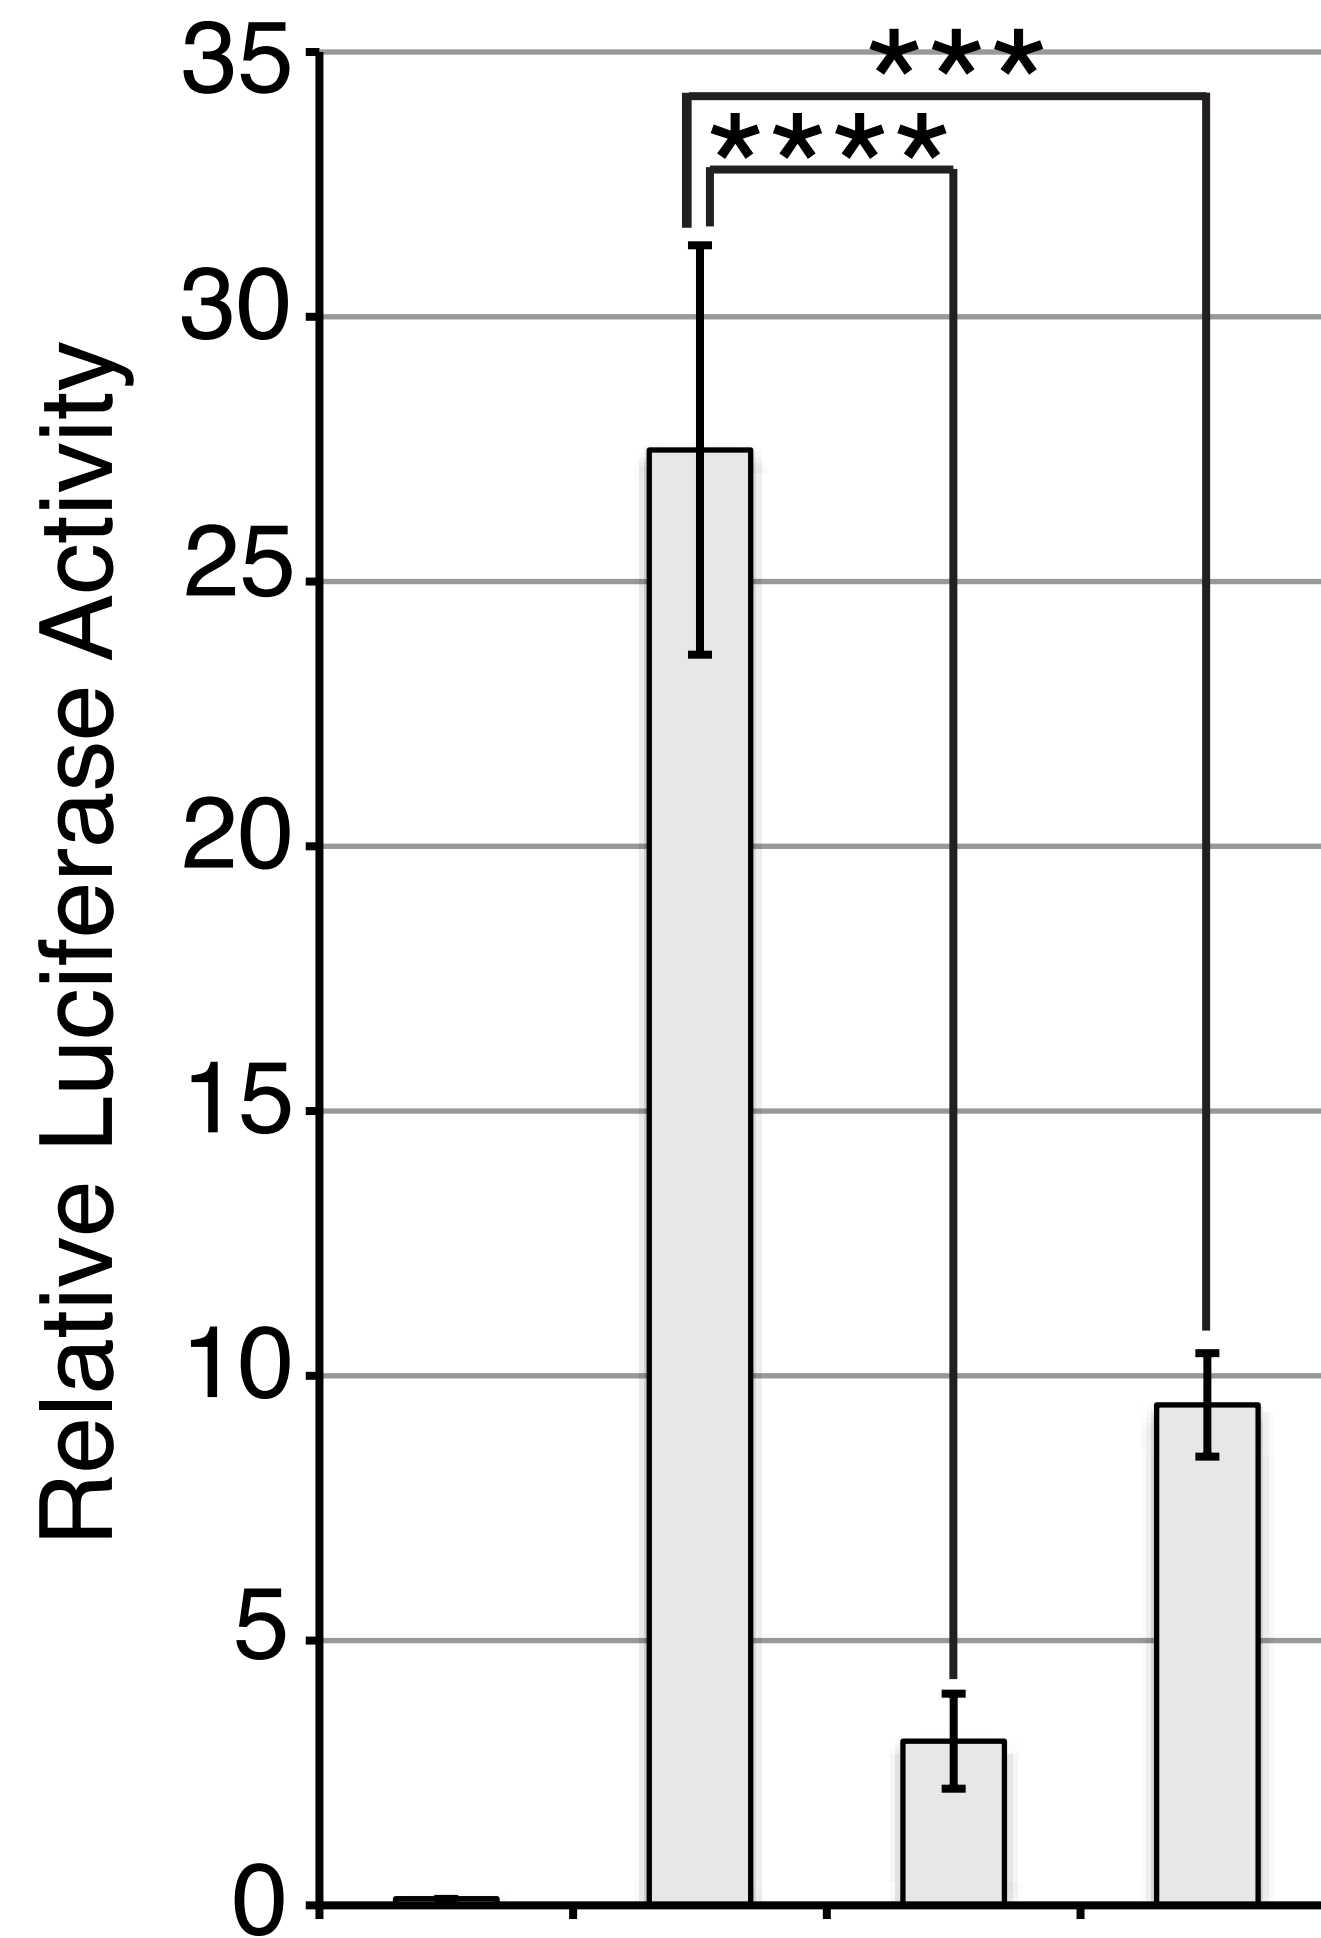

|              |    |   |    |    |
|--------------|----|---|----|----|
| VP16-AR16Q-N | -  | + | +  | +  |
| Gal4-AR-C    | +  | + | +  | +  |
| FLAG-NLK     | WT | - | WT | KN |
| DHT          | +  | + | +  | +  |

**B**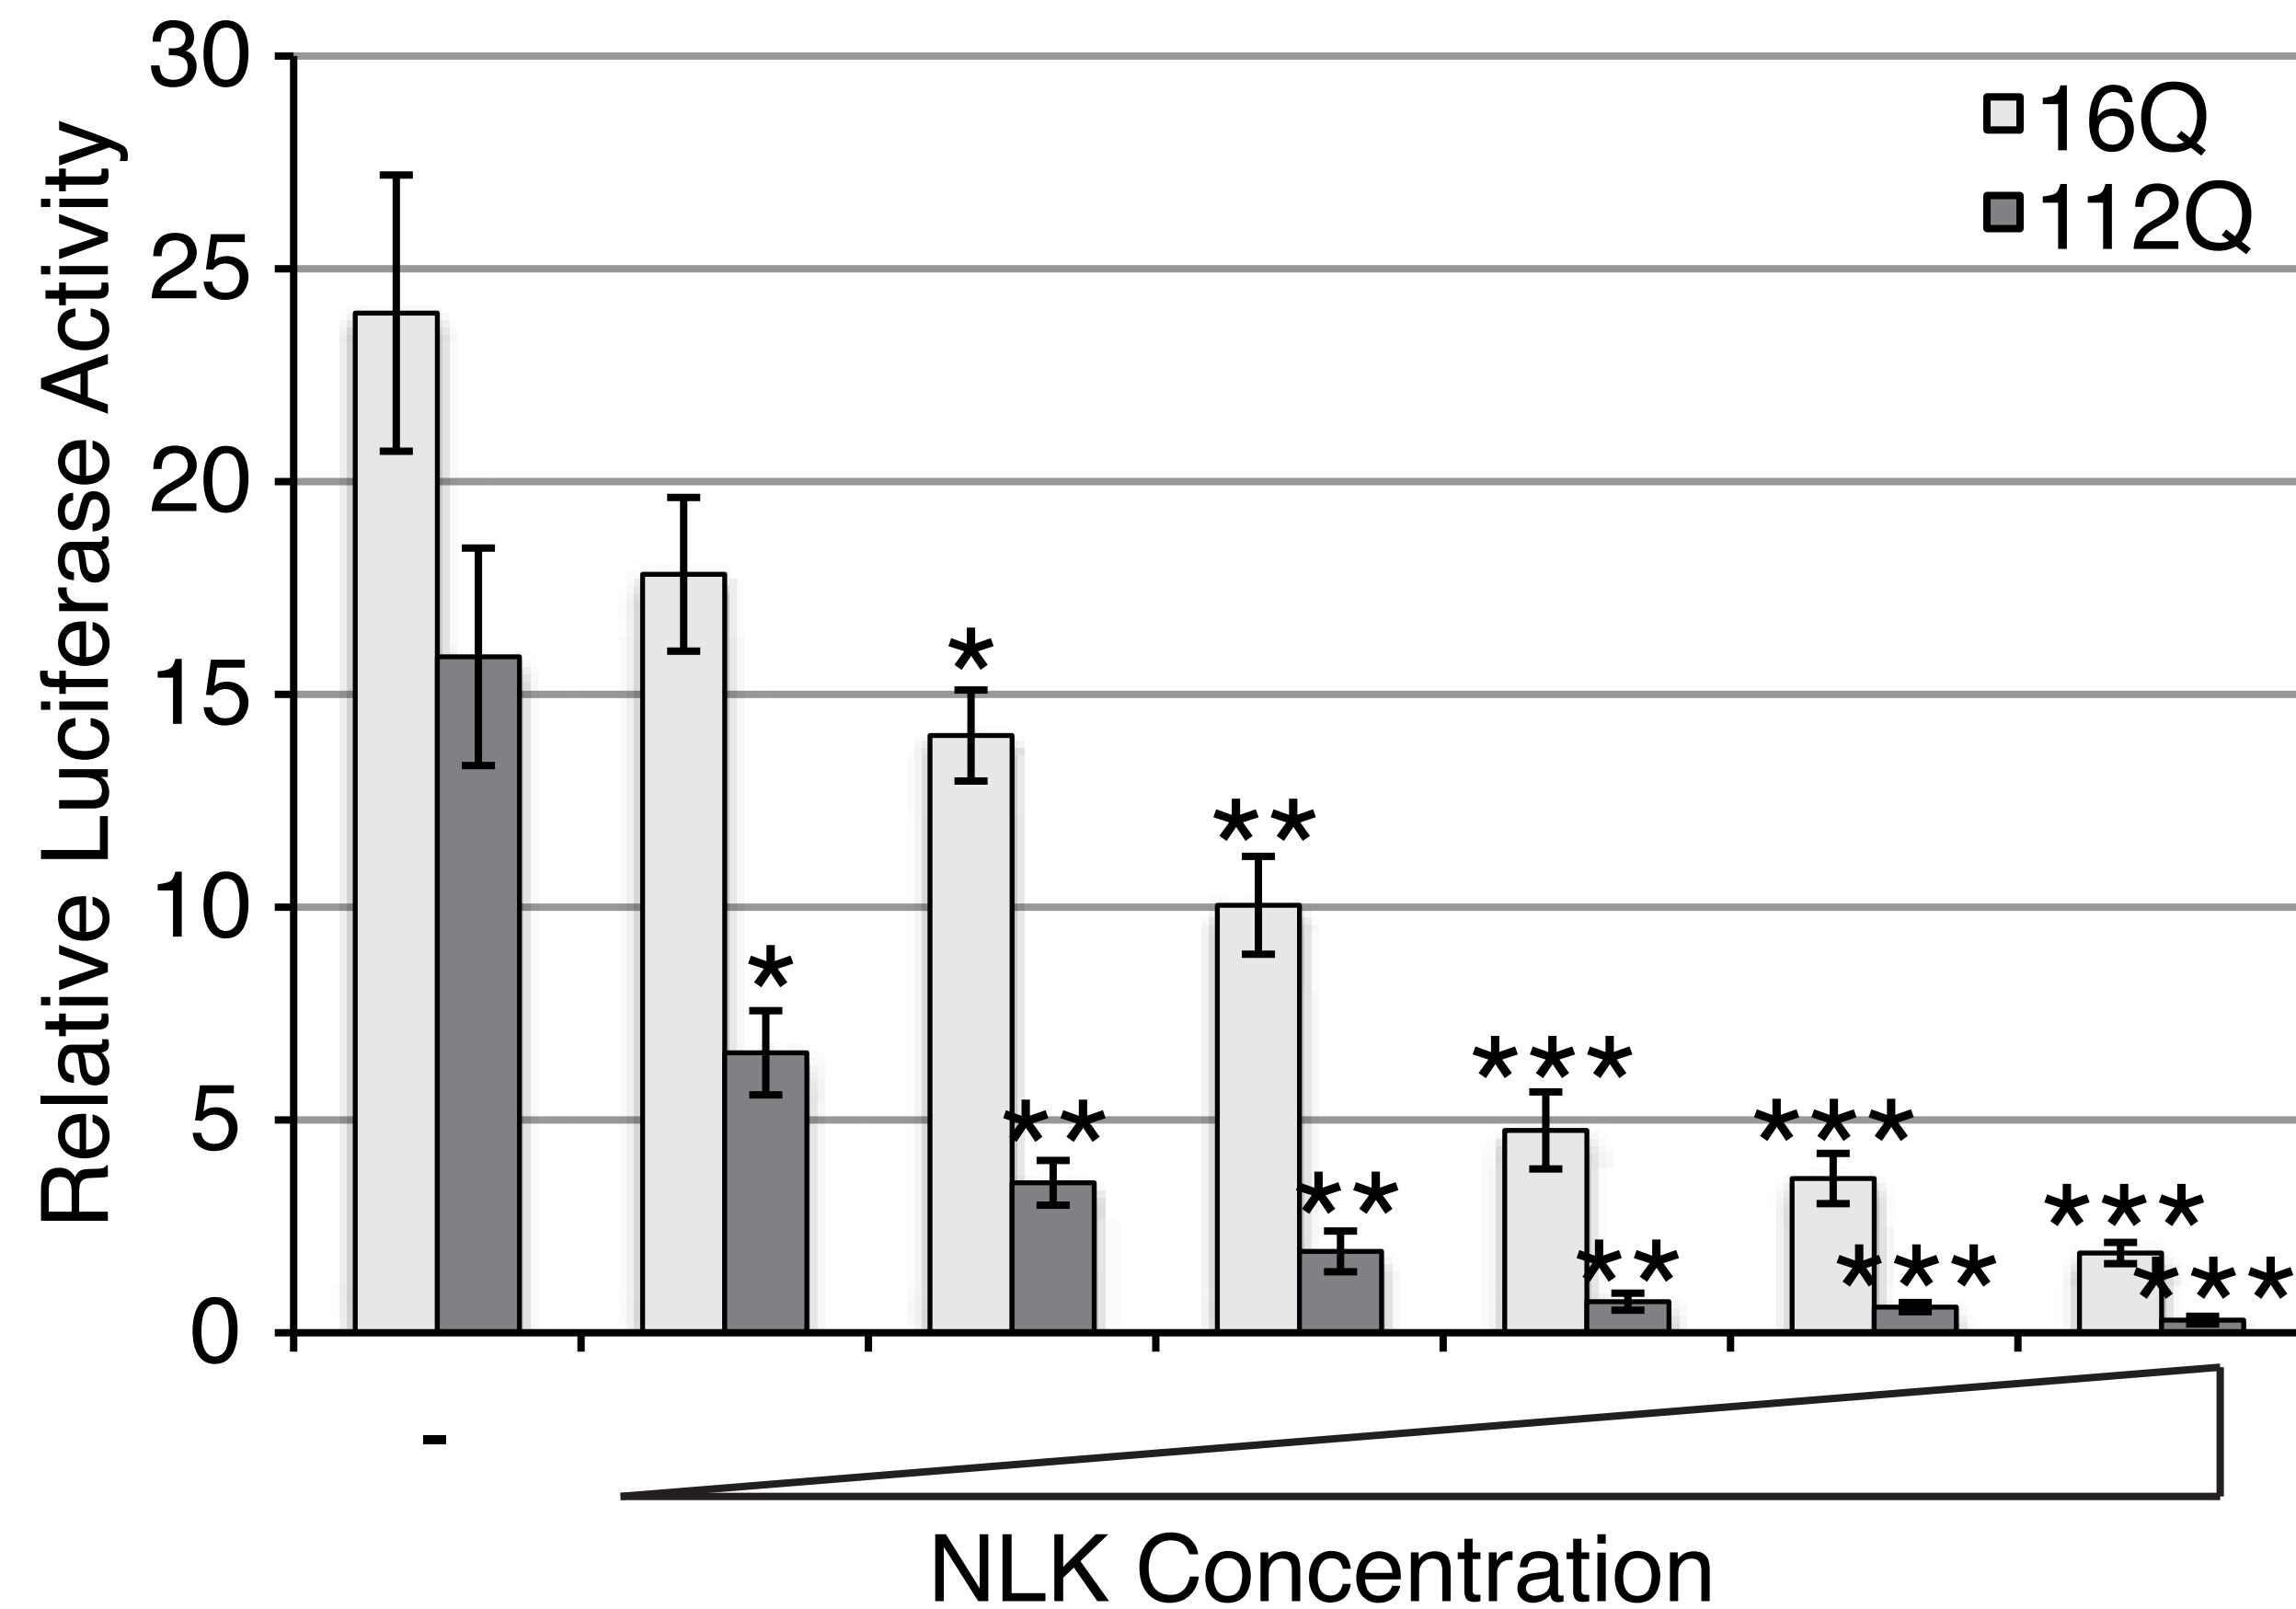

Supplement: supp [file elife_poa_e08493_Figure_11_figure_supplement_2.pdf › elife_poa_e08493_Figure_11_figure_supplement_2.pdf]

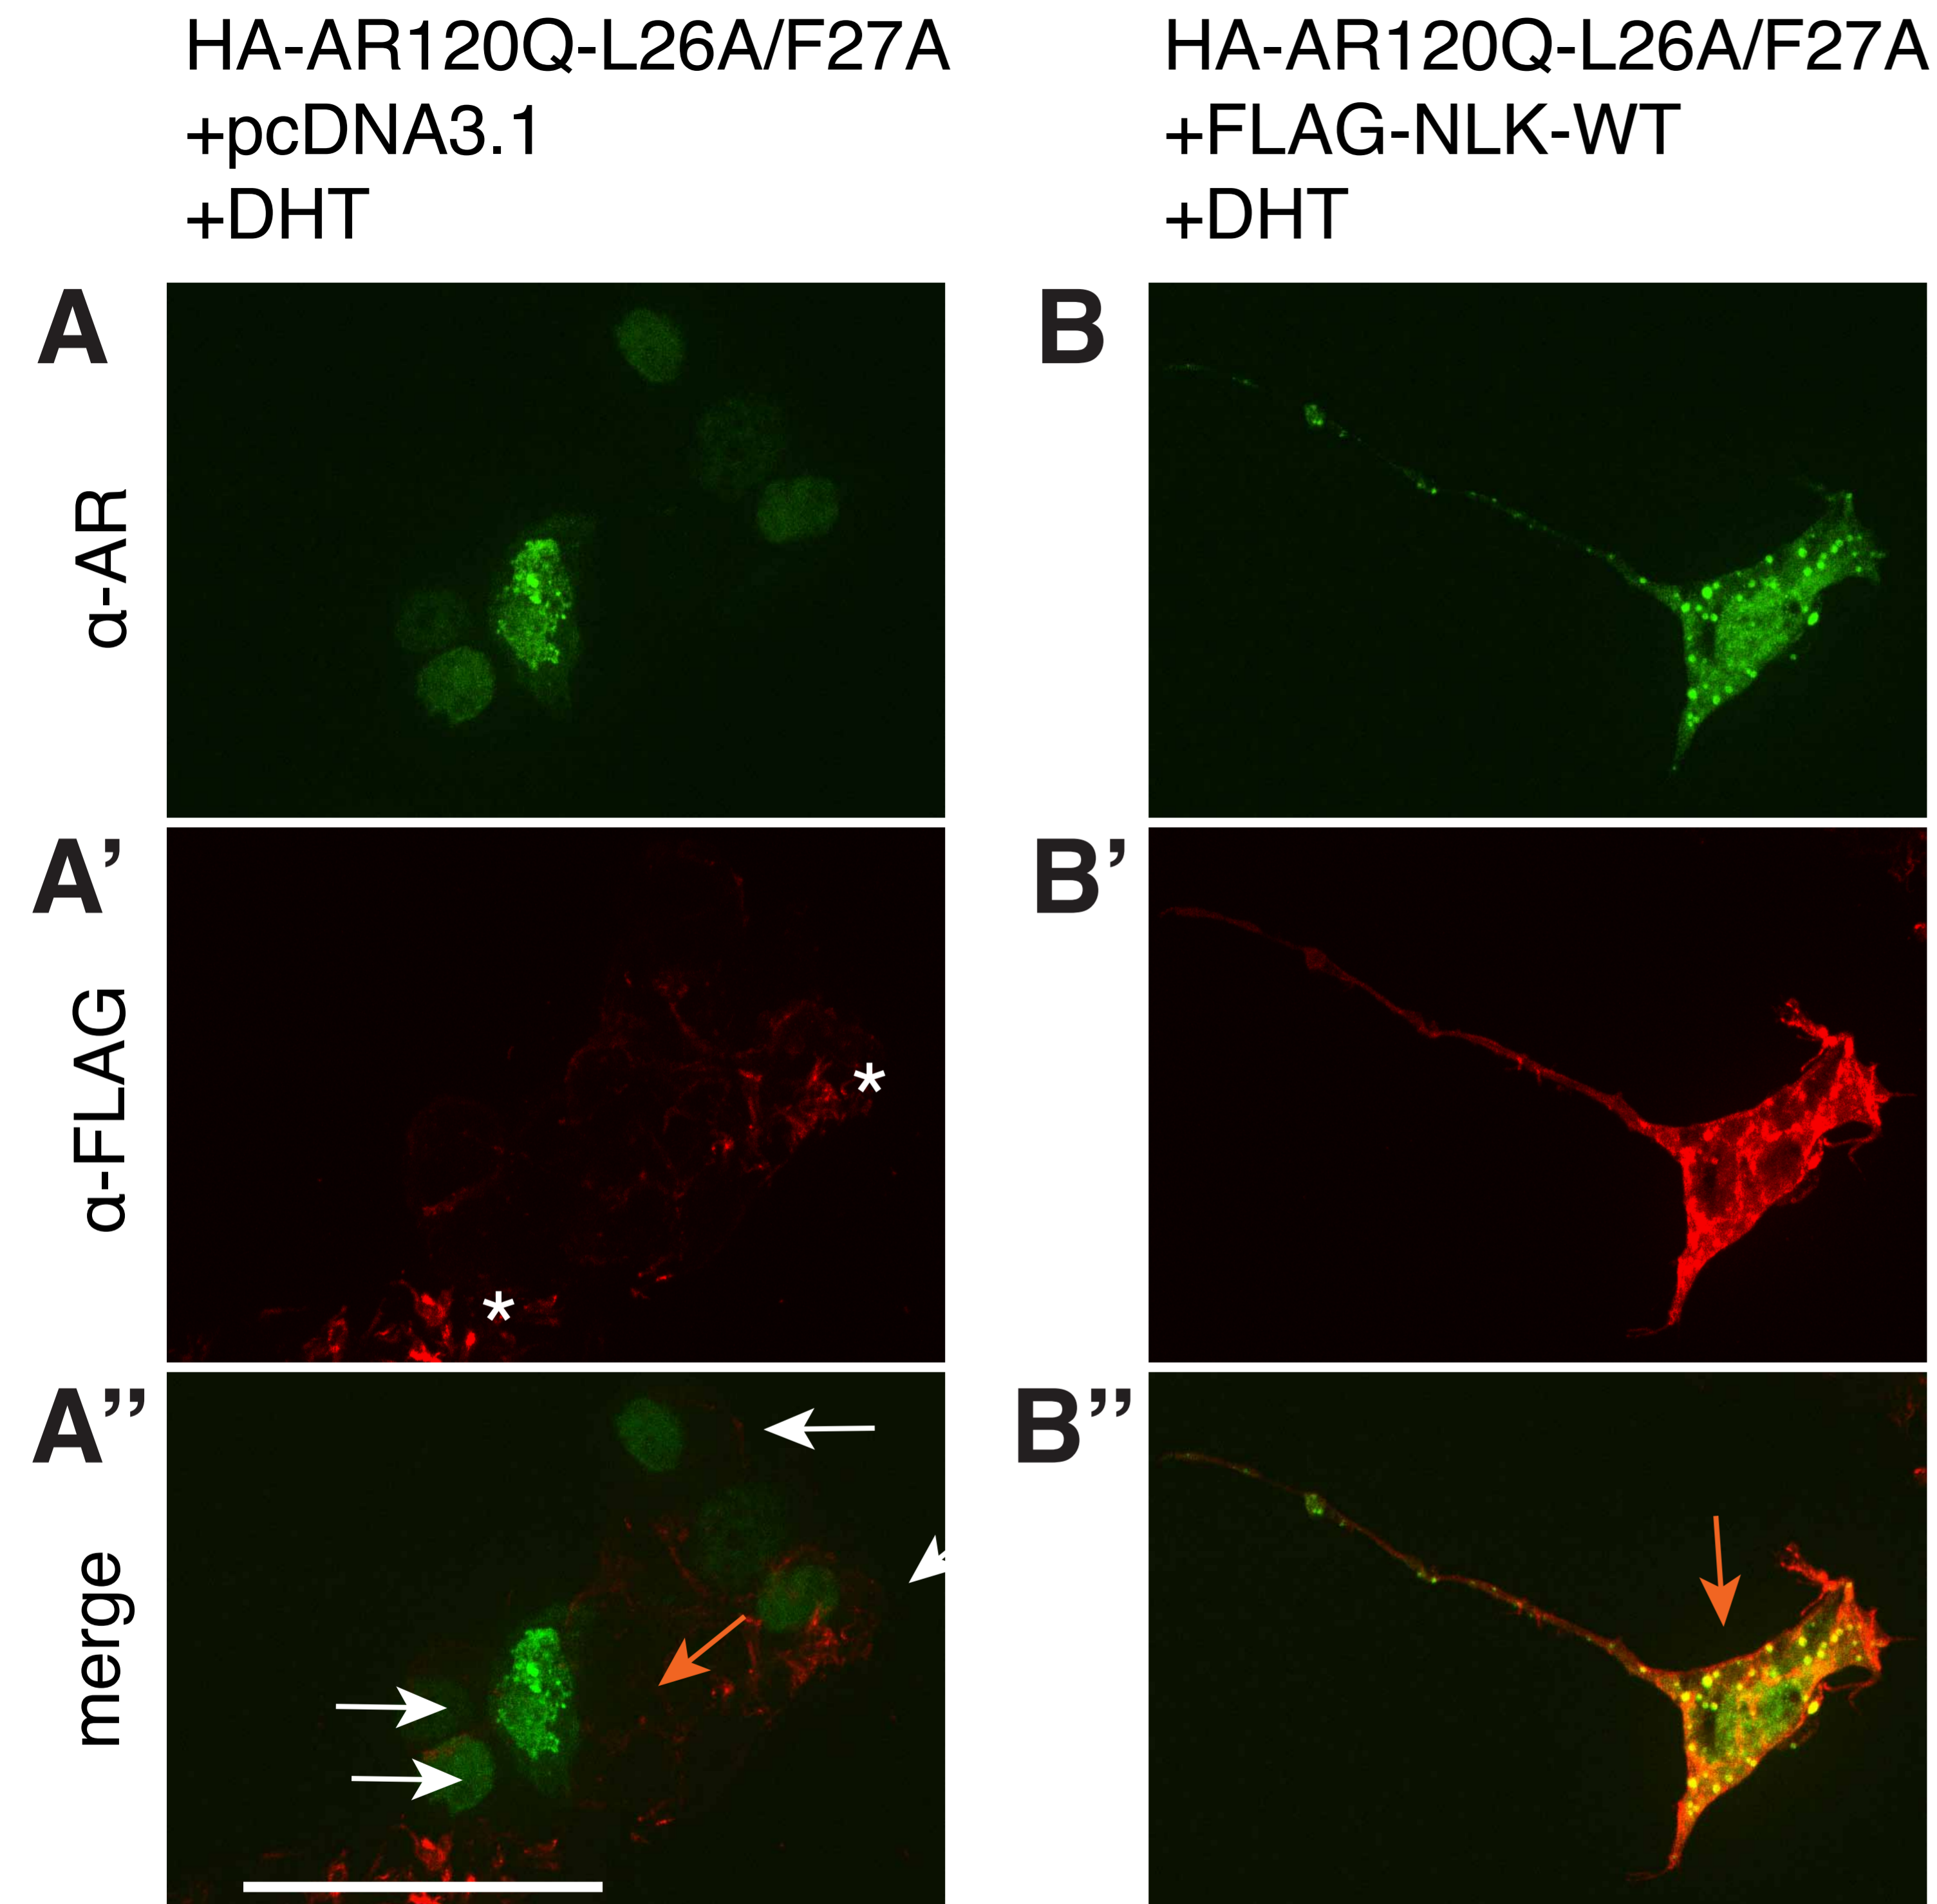

**C**

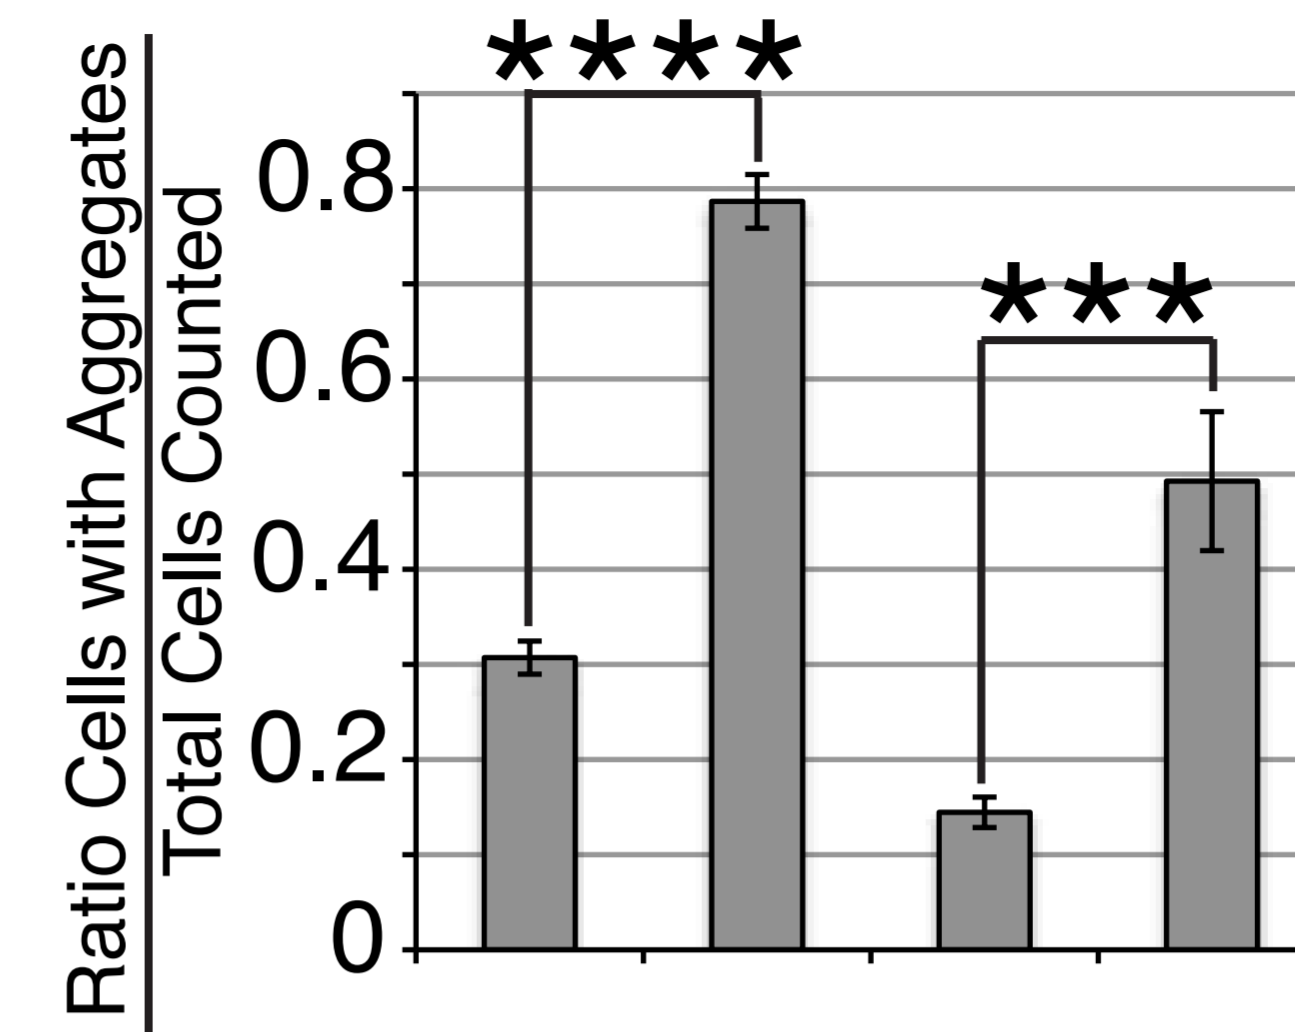

|                     |   |   |   |   |
|---------------------|---|---|---|---|
| HA-AR120Q           | + | + | - | - |
| HA-AR120Q-L26A/F27A | - | - | + | + |
| FLAG-NLK-WT         | - | + | - | + |
| DHT                 | + | + | + | + |

**D**

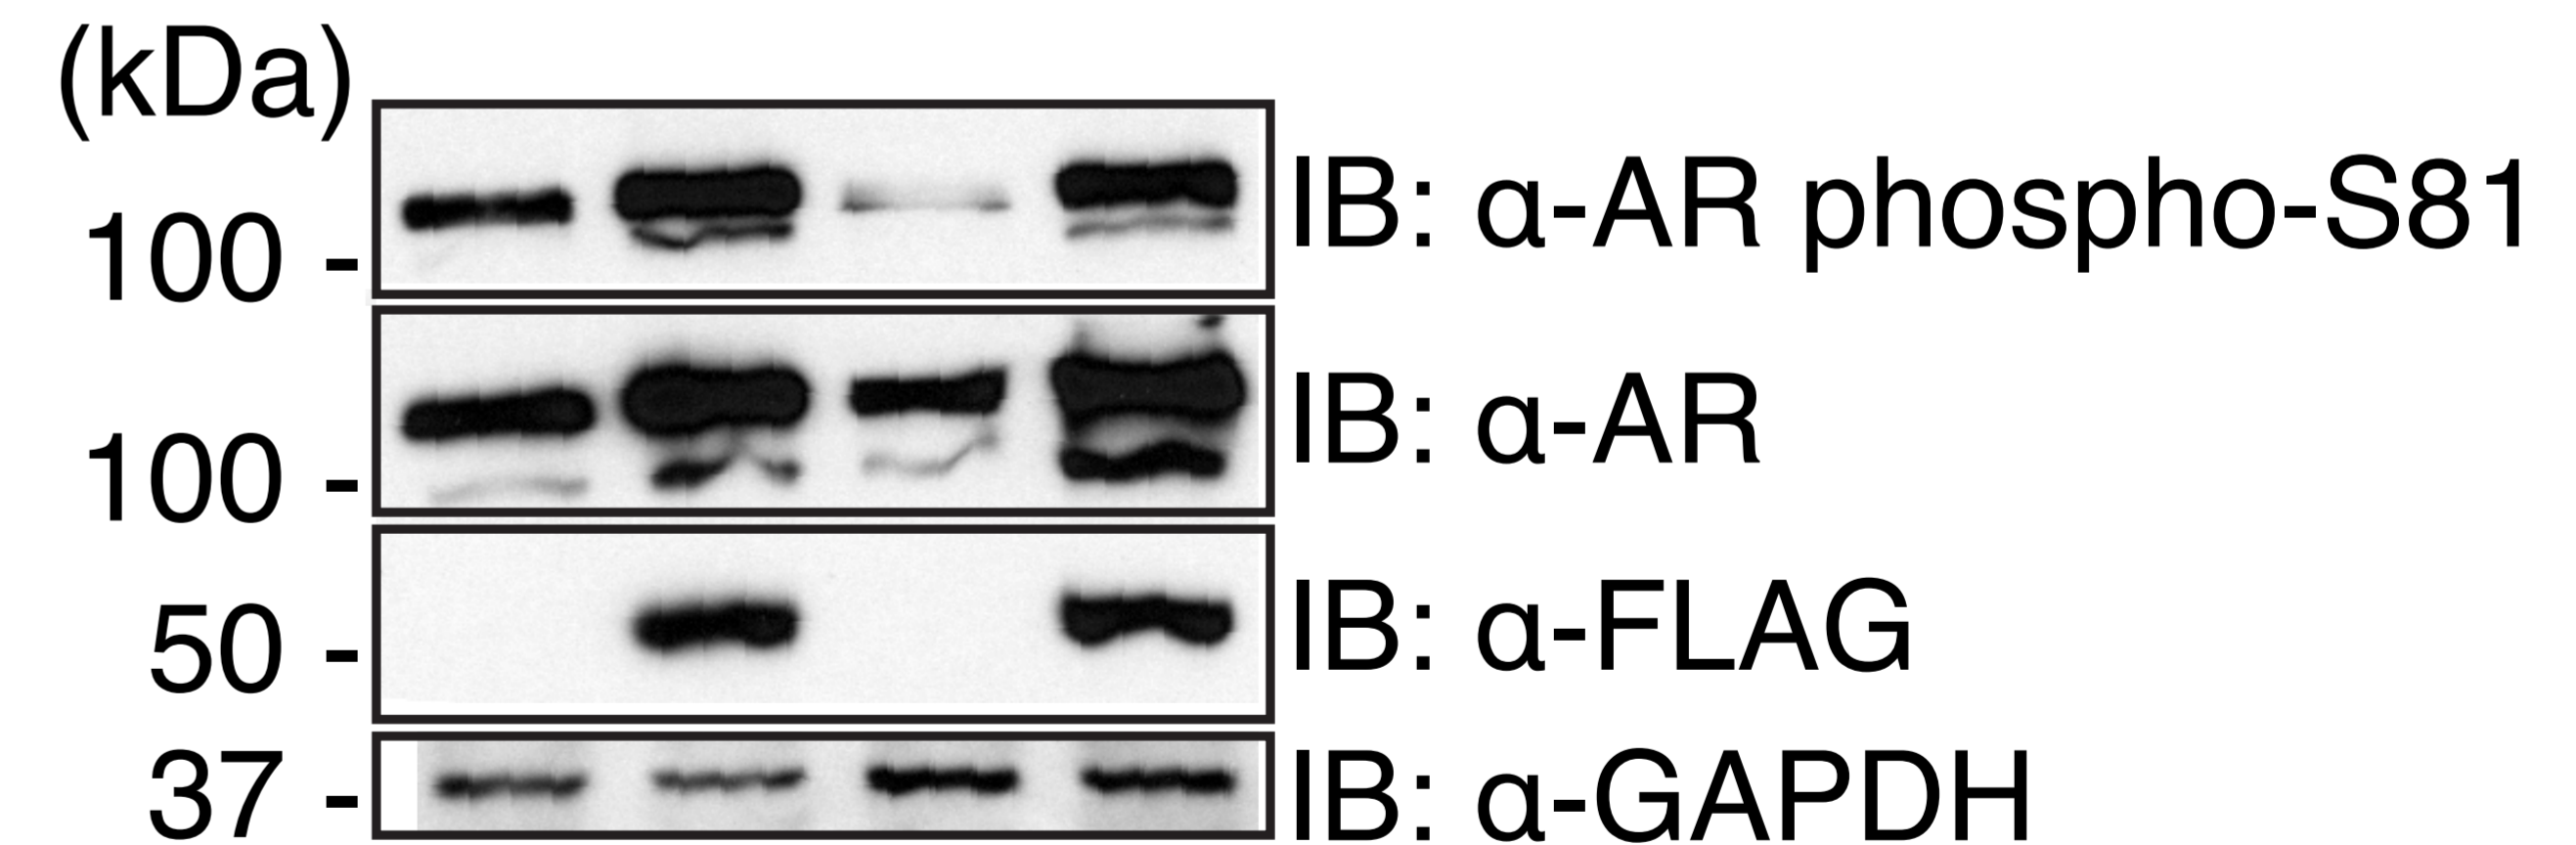

|                     |   |   |   |   |
|---------------------|---|---|---|---|
| HA-AR120Q           | + | + | - | - |
| HA-AR120Q-L26A/F27A | - | - | + | + |
| FLAG-NLK-WT         | - | + | - | + |
| DHT                 | + | + | + | + |

Supplement: supp [file elife_poa_e08493_Figure_11_figure_supplement_3.pdf › elife_poa_e08493_Figure_11_figure_supplement_3.pdf]

HA-AR120Q  
pcDNA3.1  
-DHT

HA-AR120Q  
FLAG-NLK-WT  
-DHT

HA-AR120Q  
FLAG-NLK-KN  
-DHT

$\alpha$ -AR

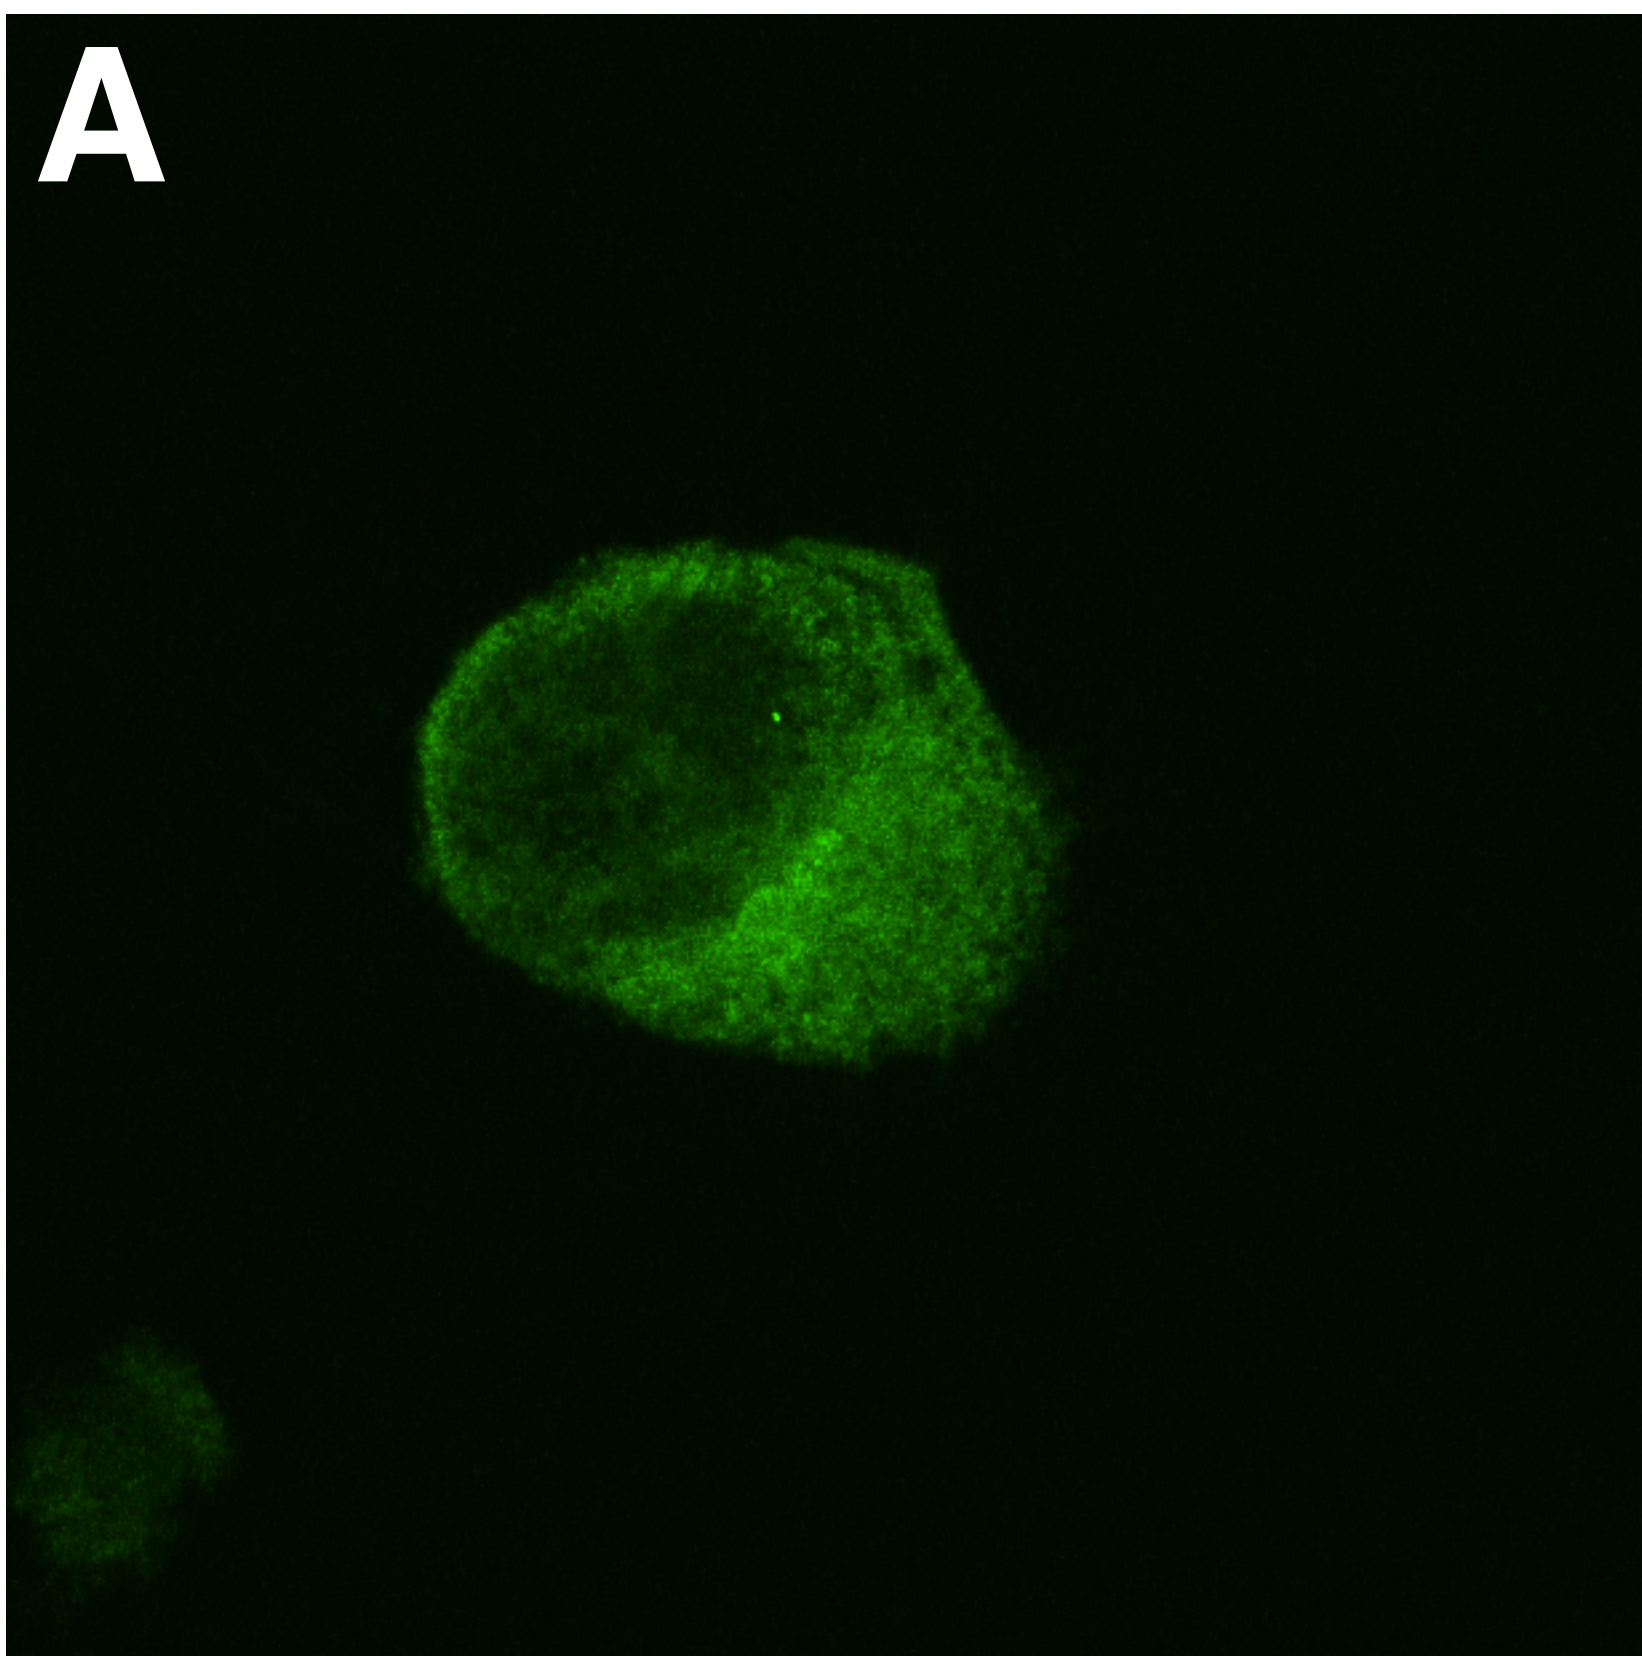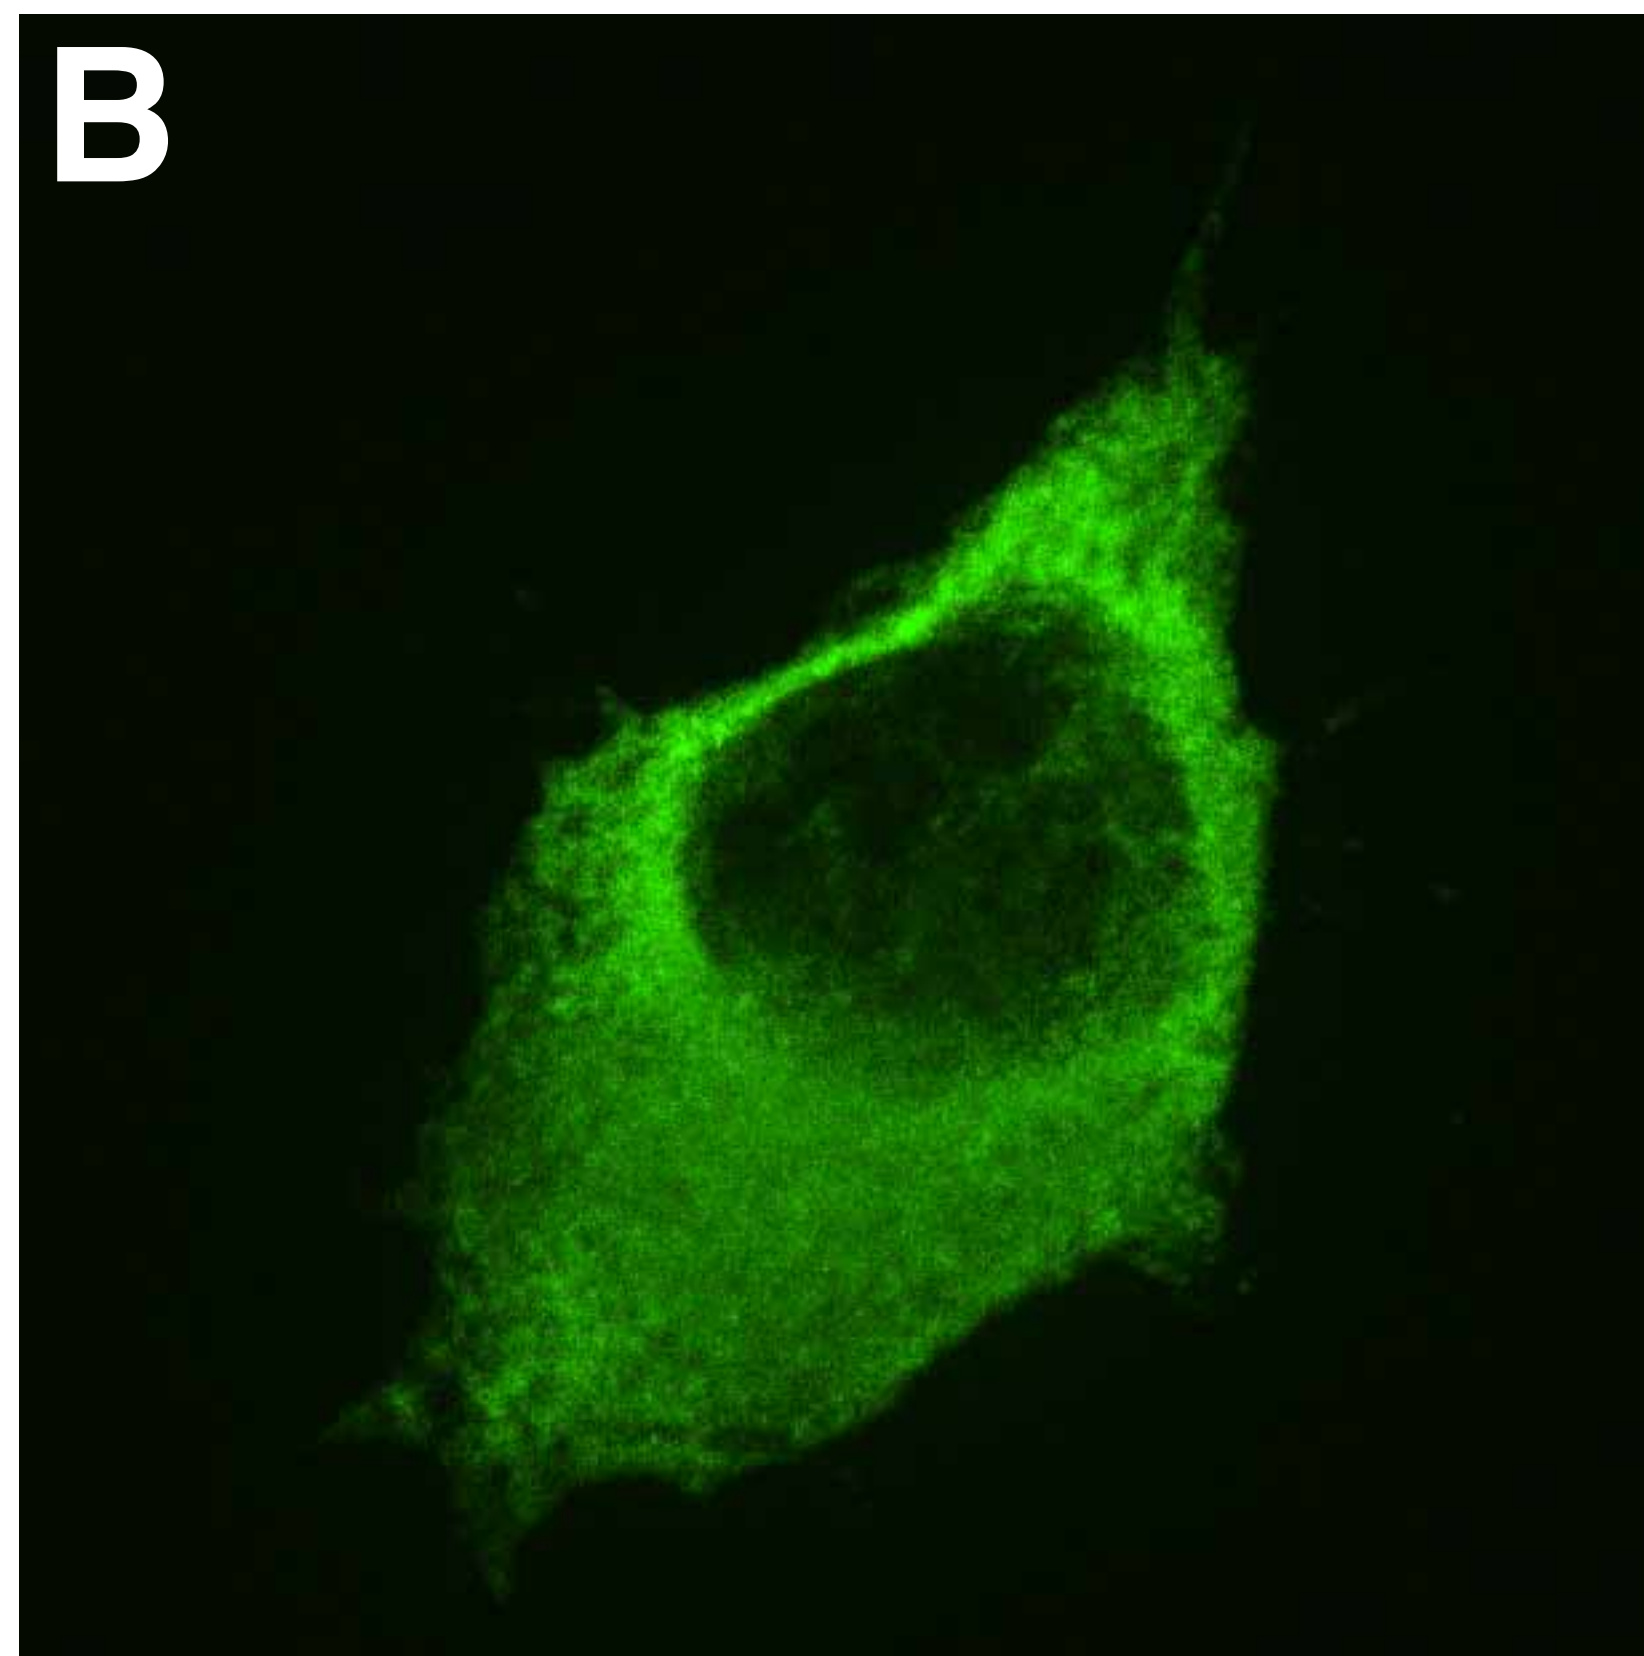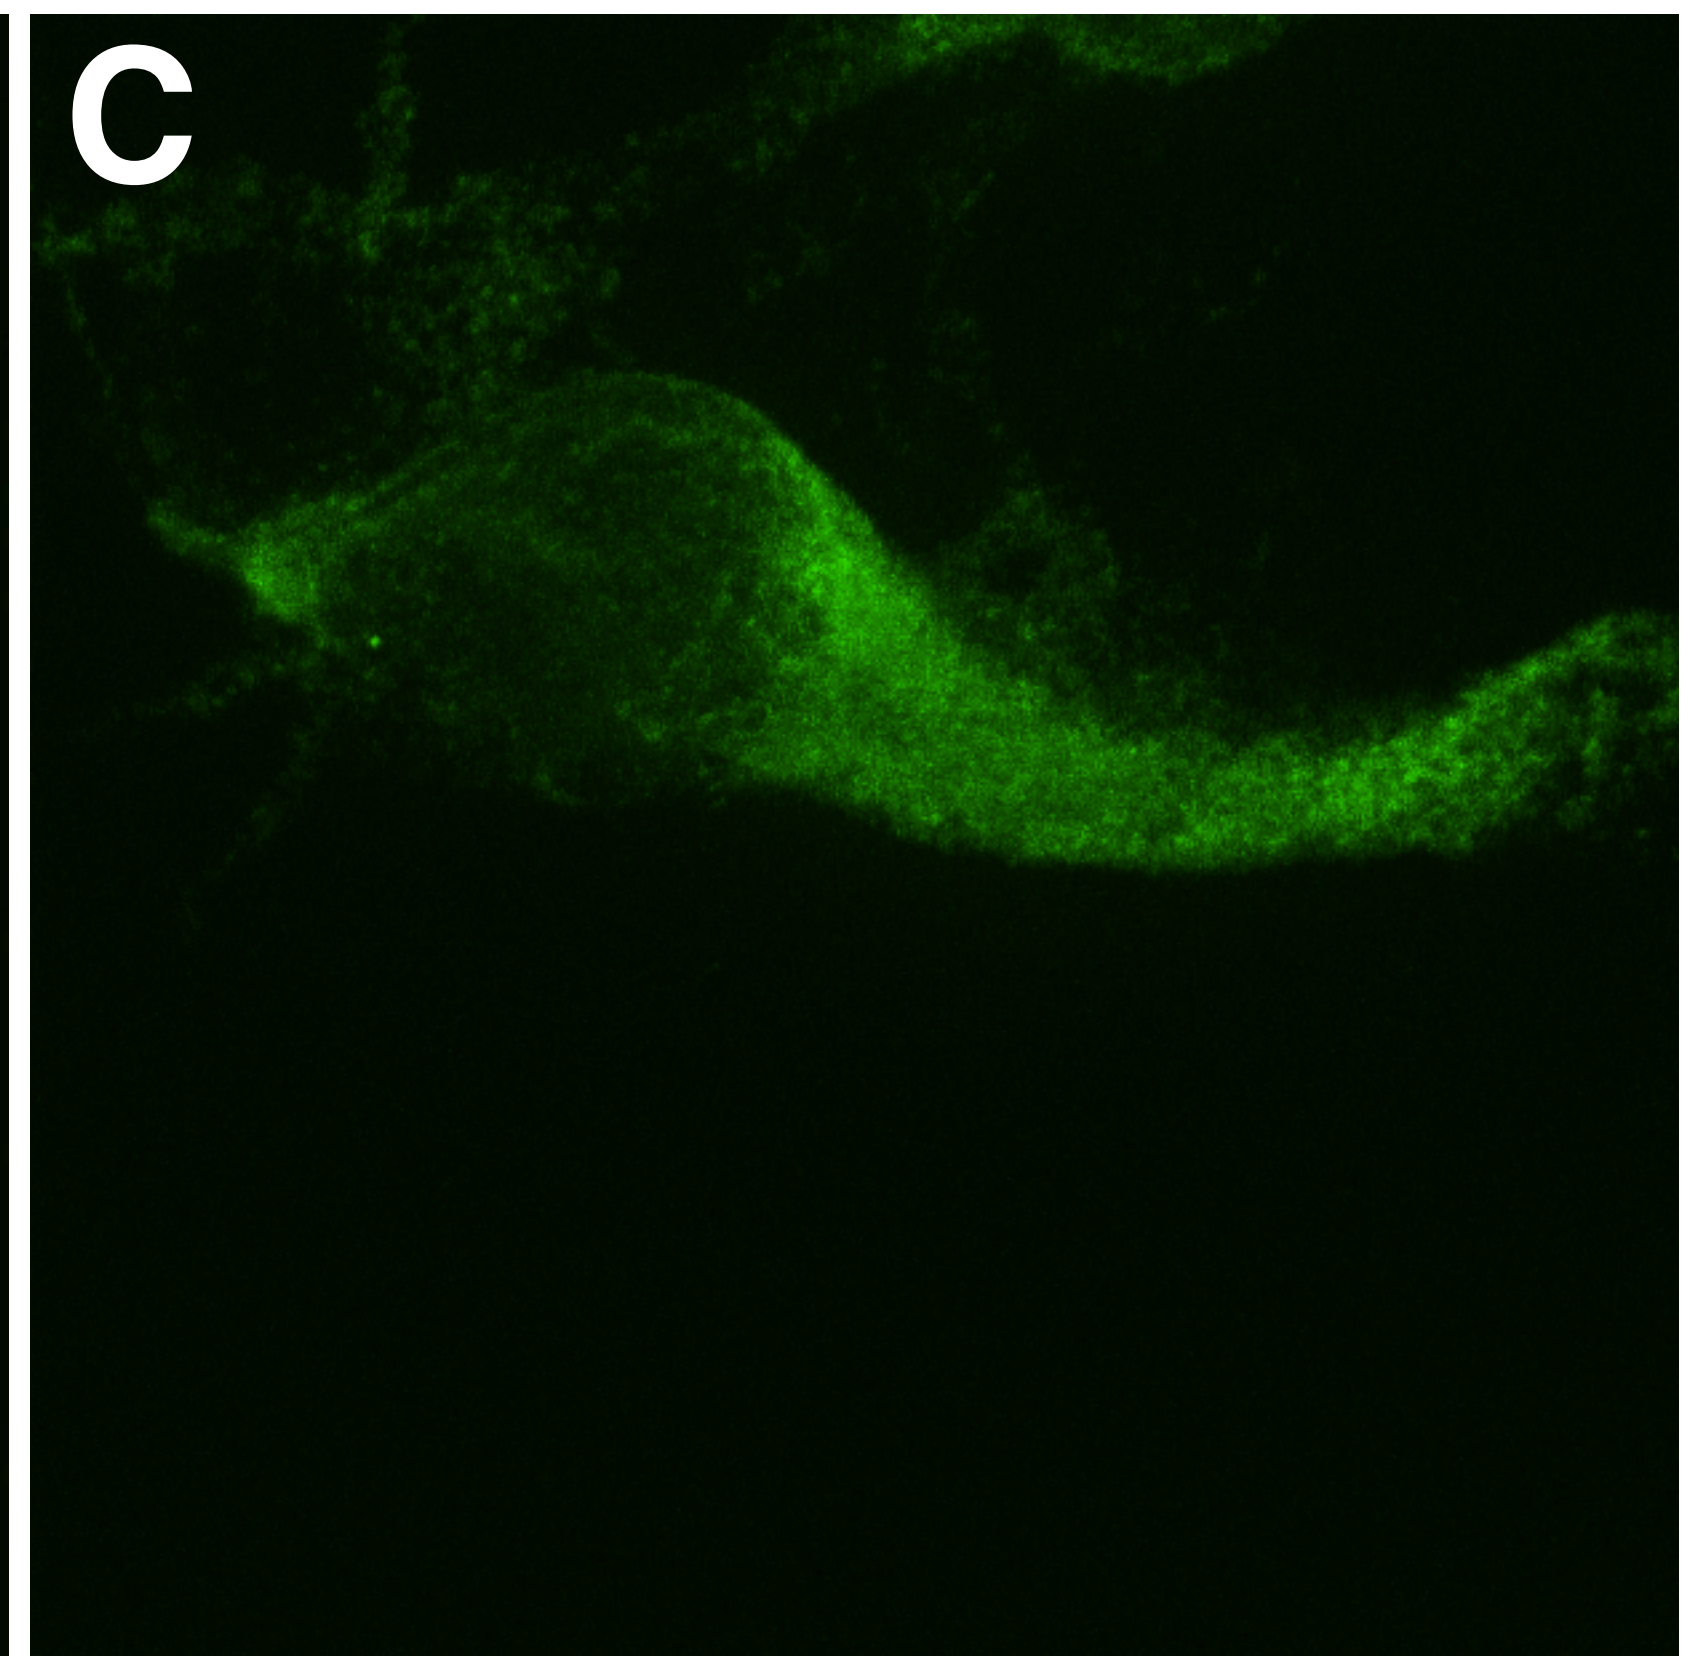

$\alpha$ -FLAG (NLK)

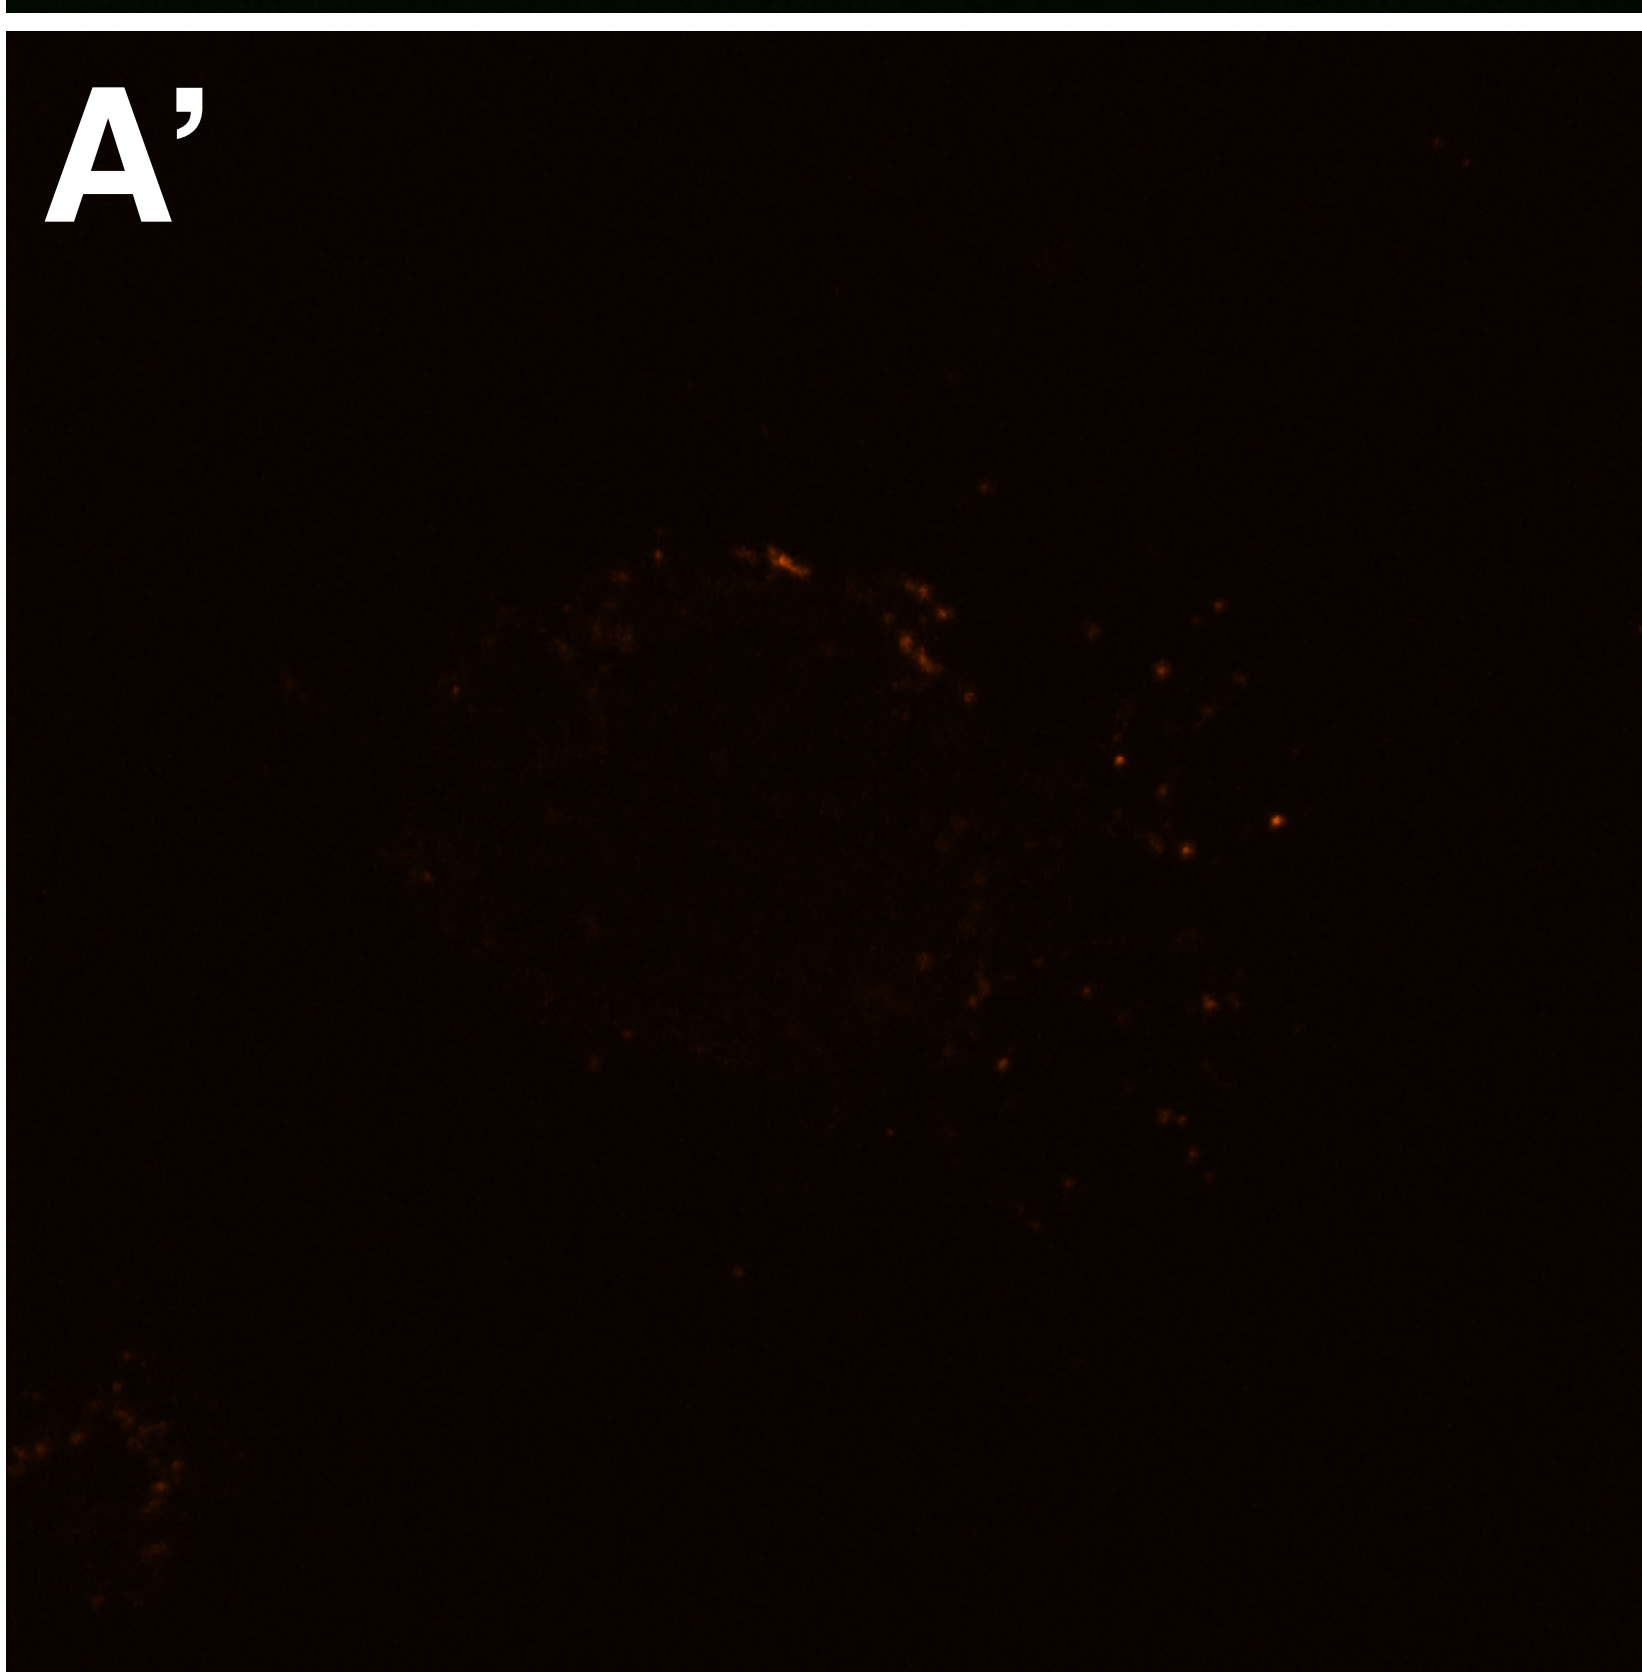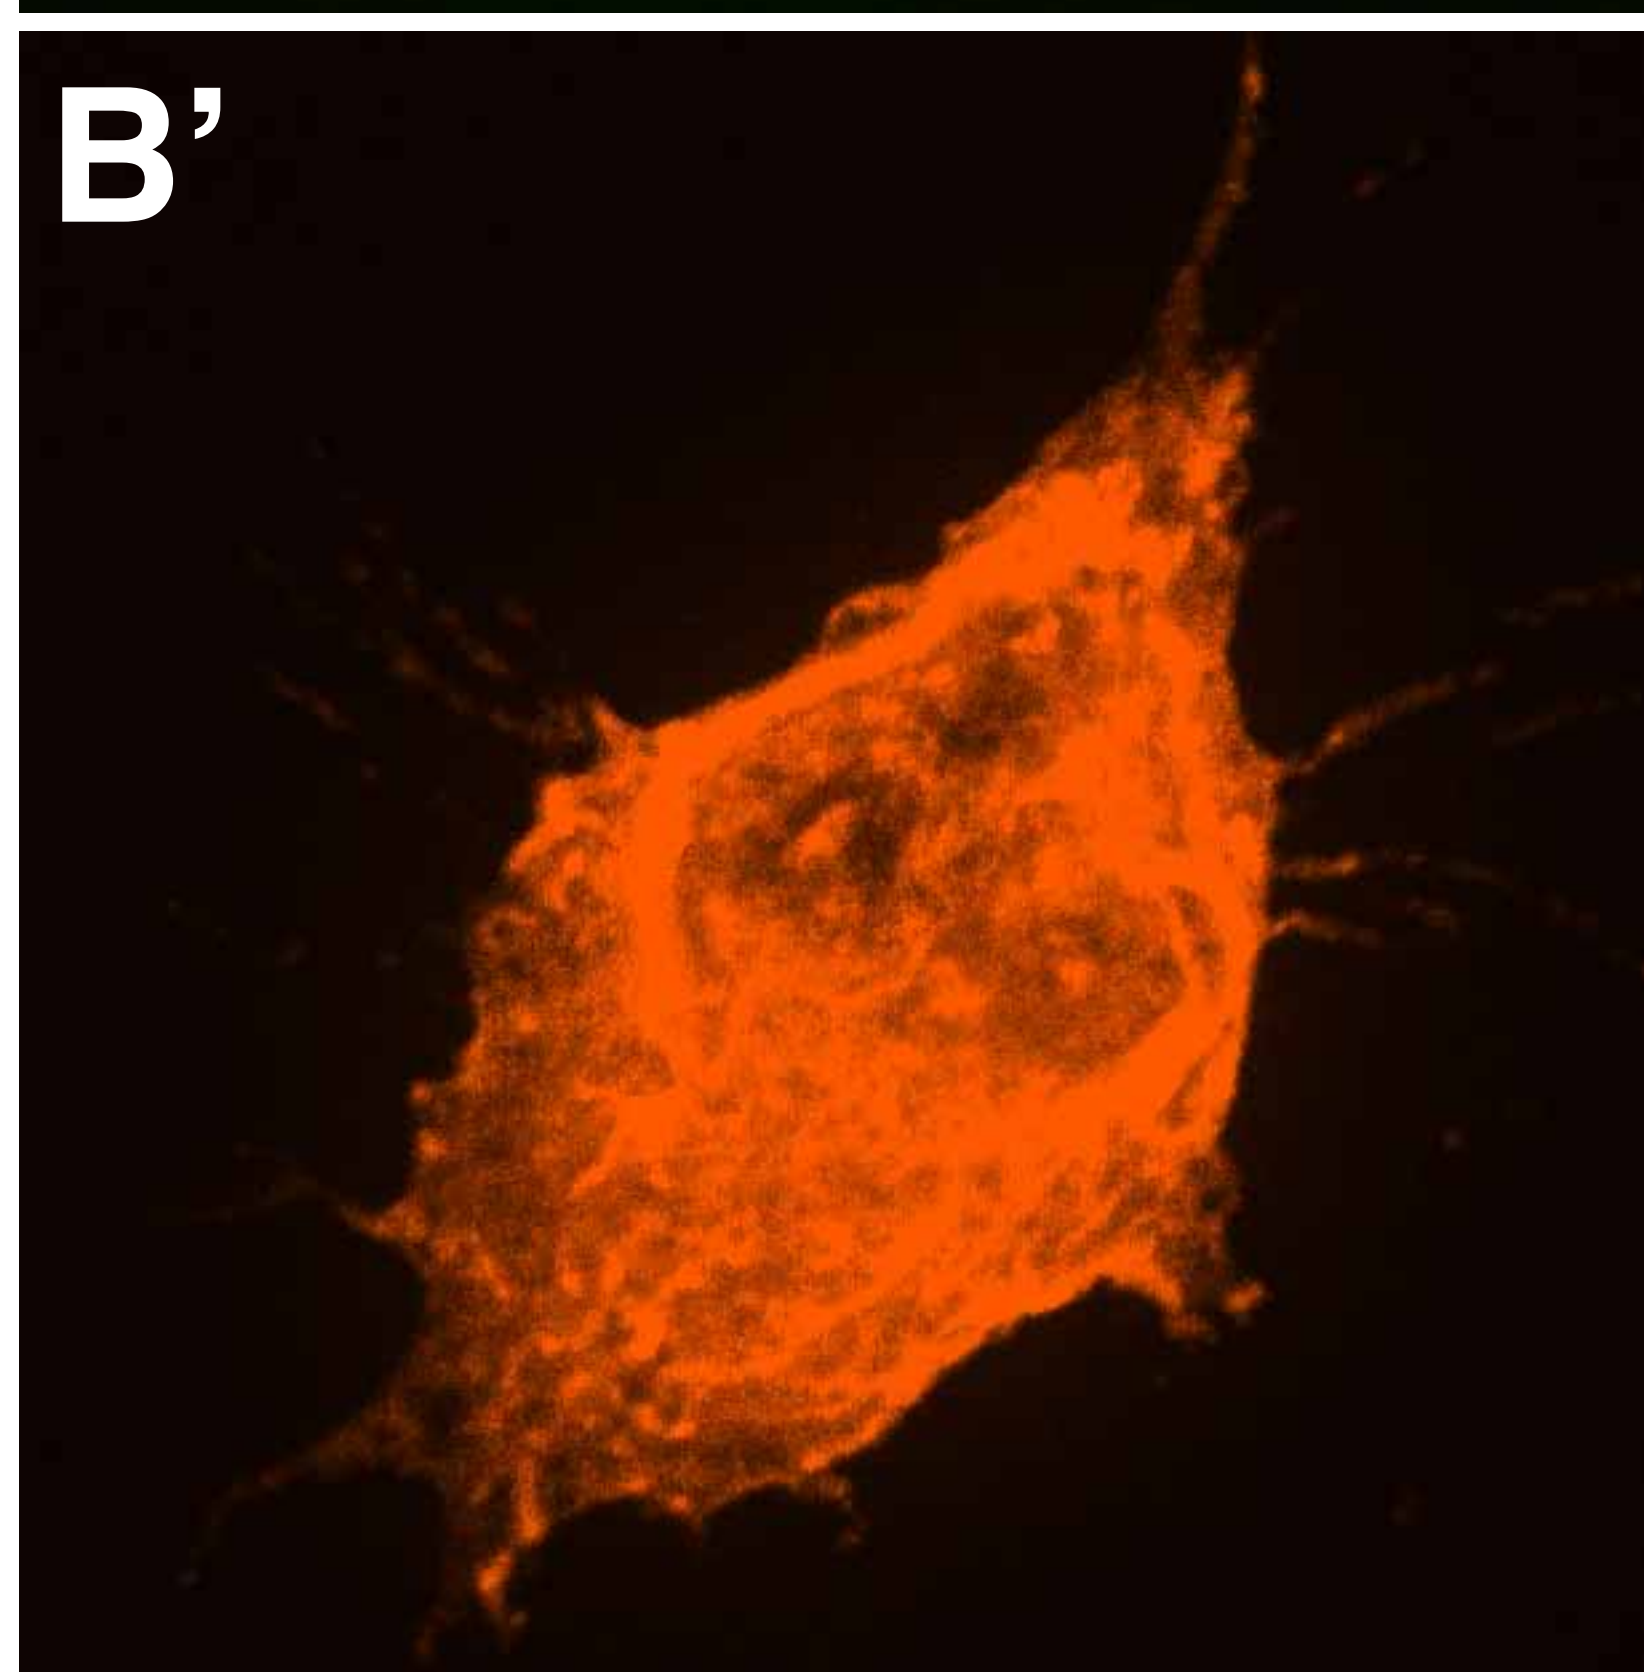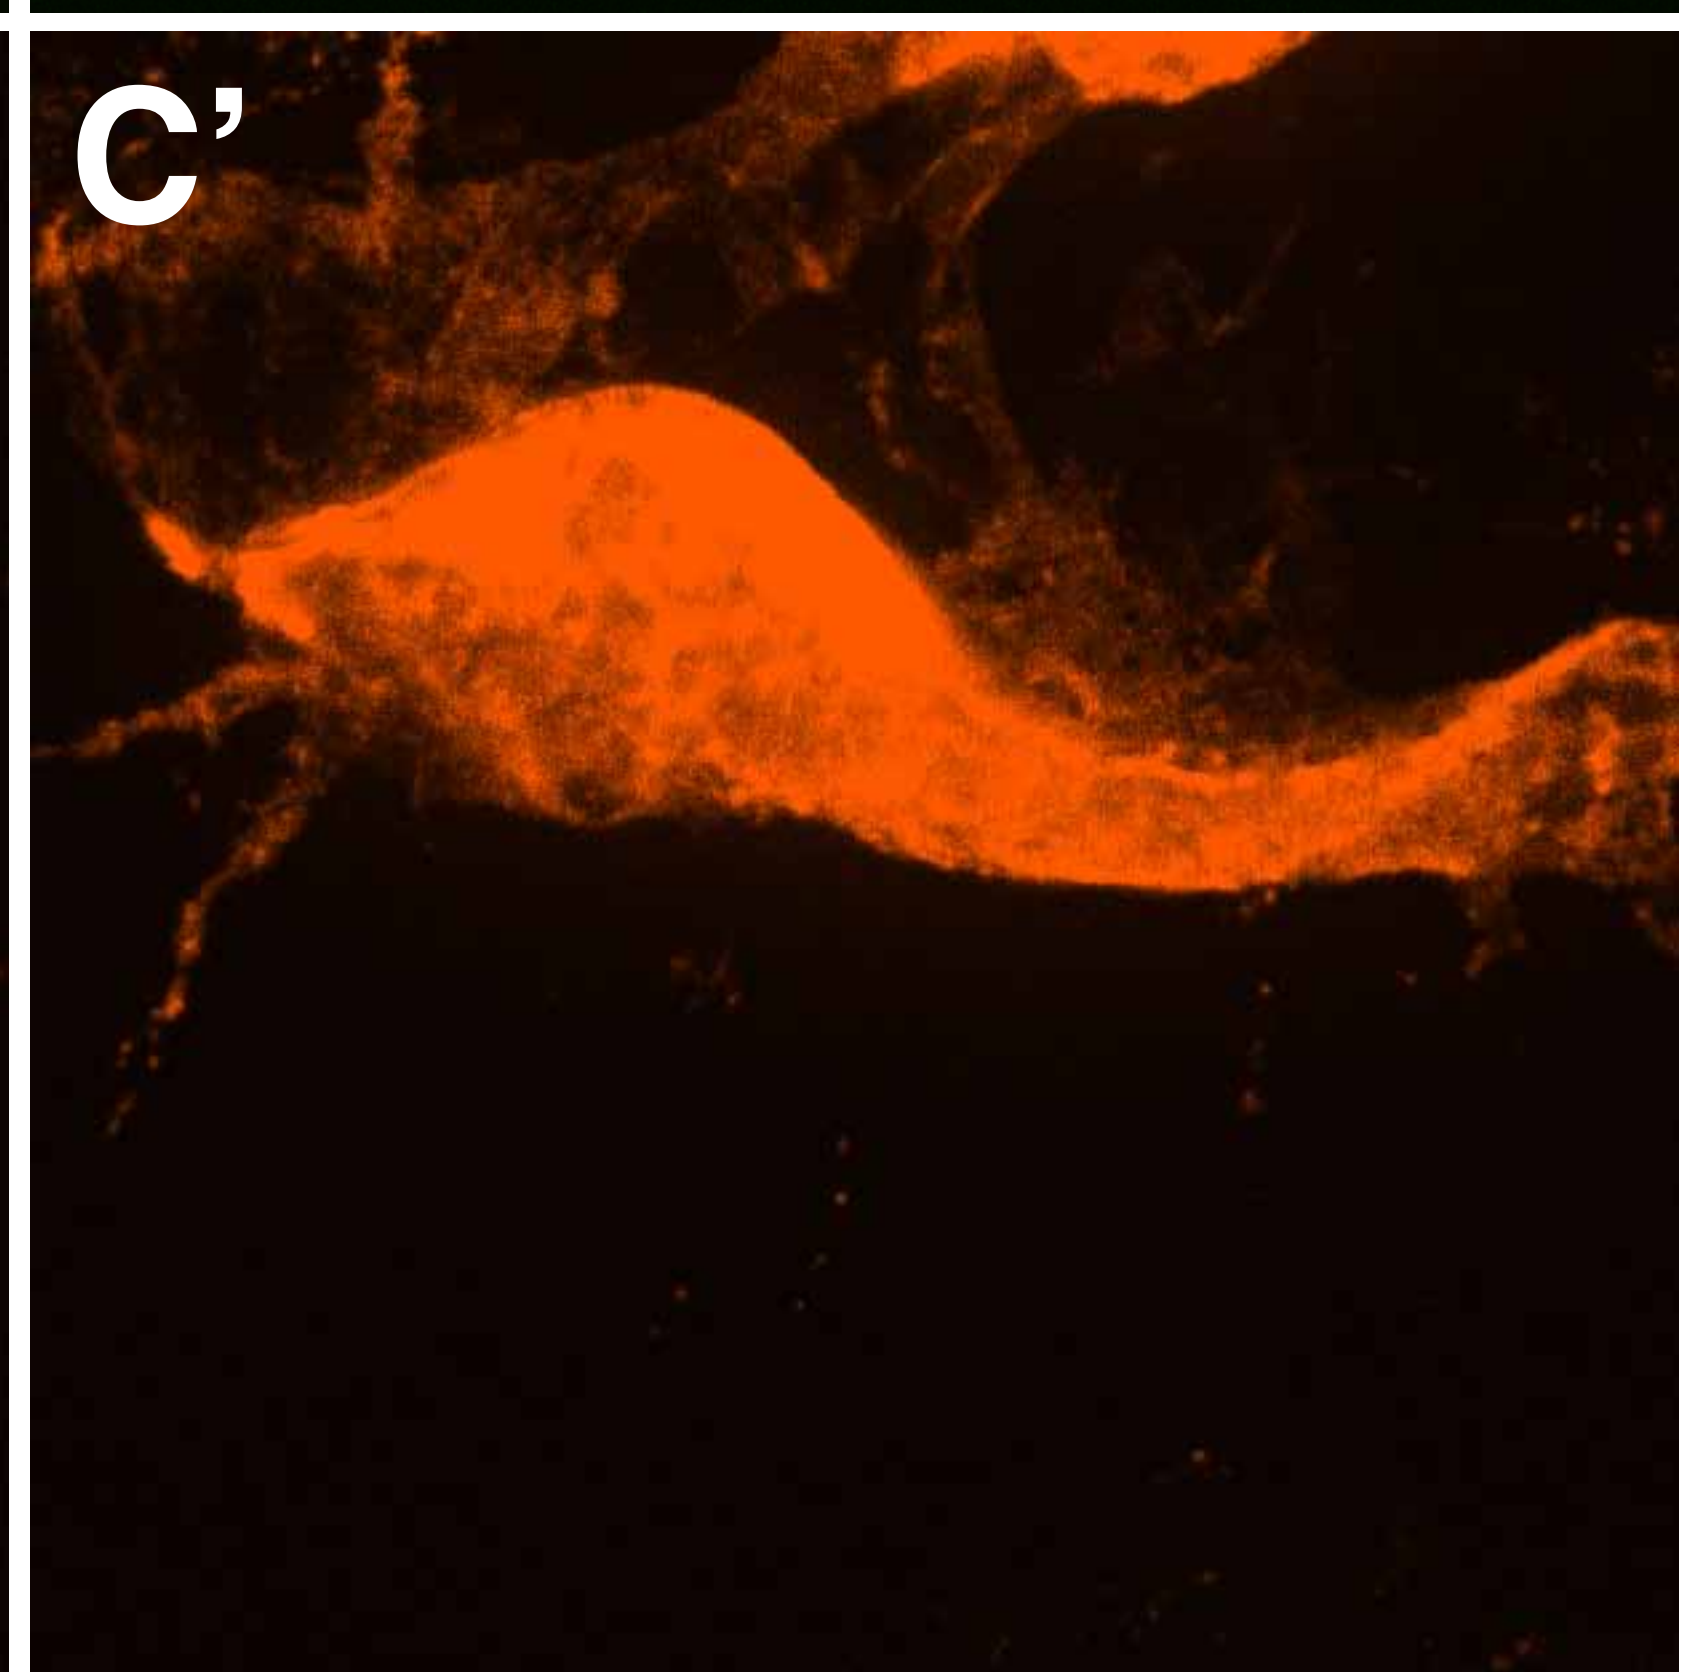

merge

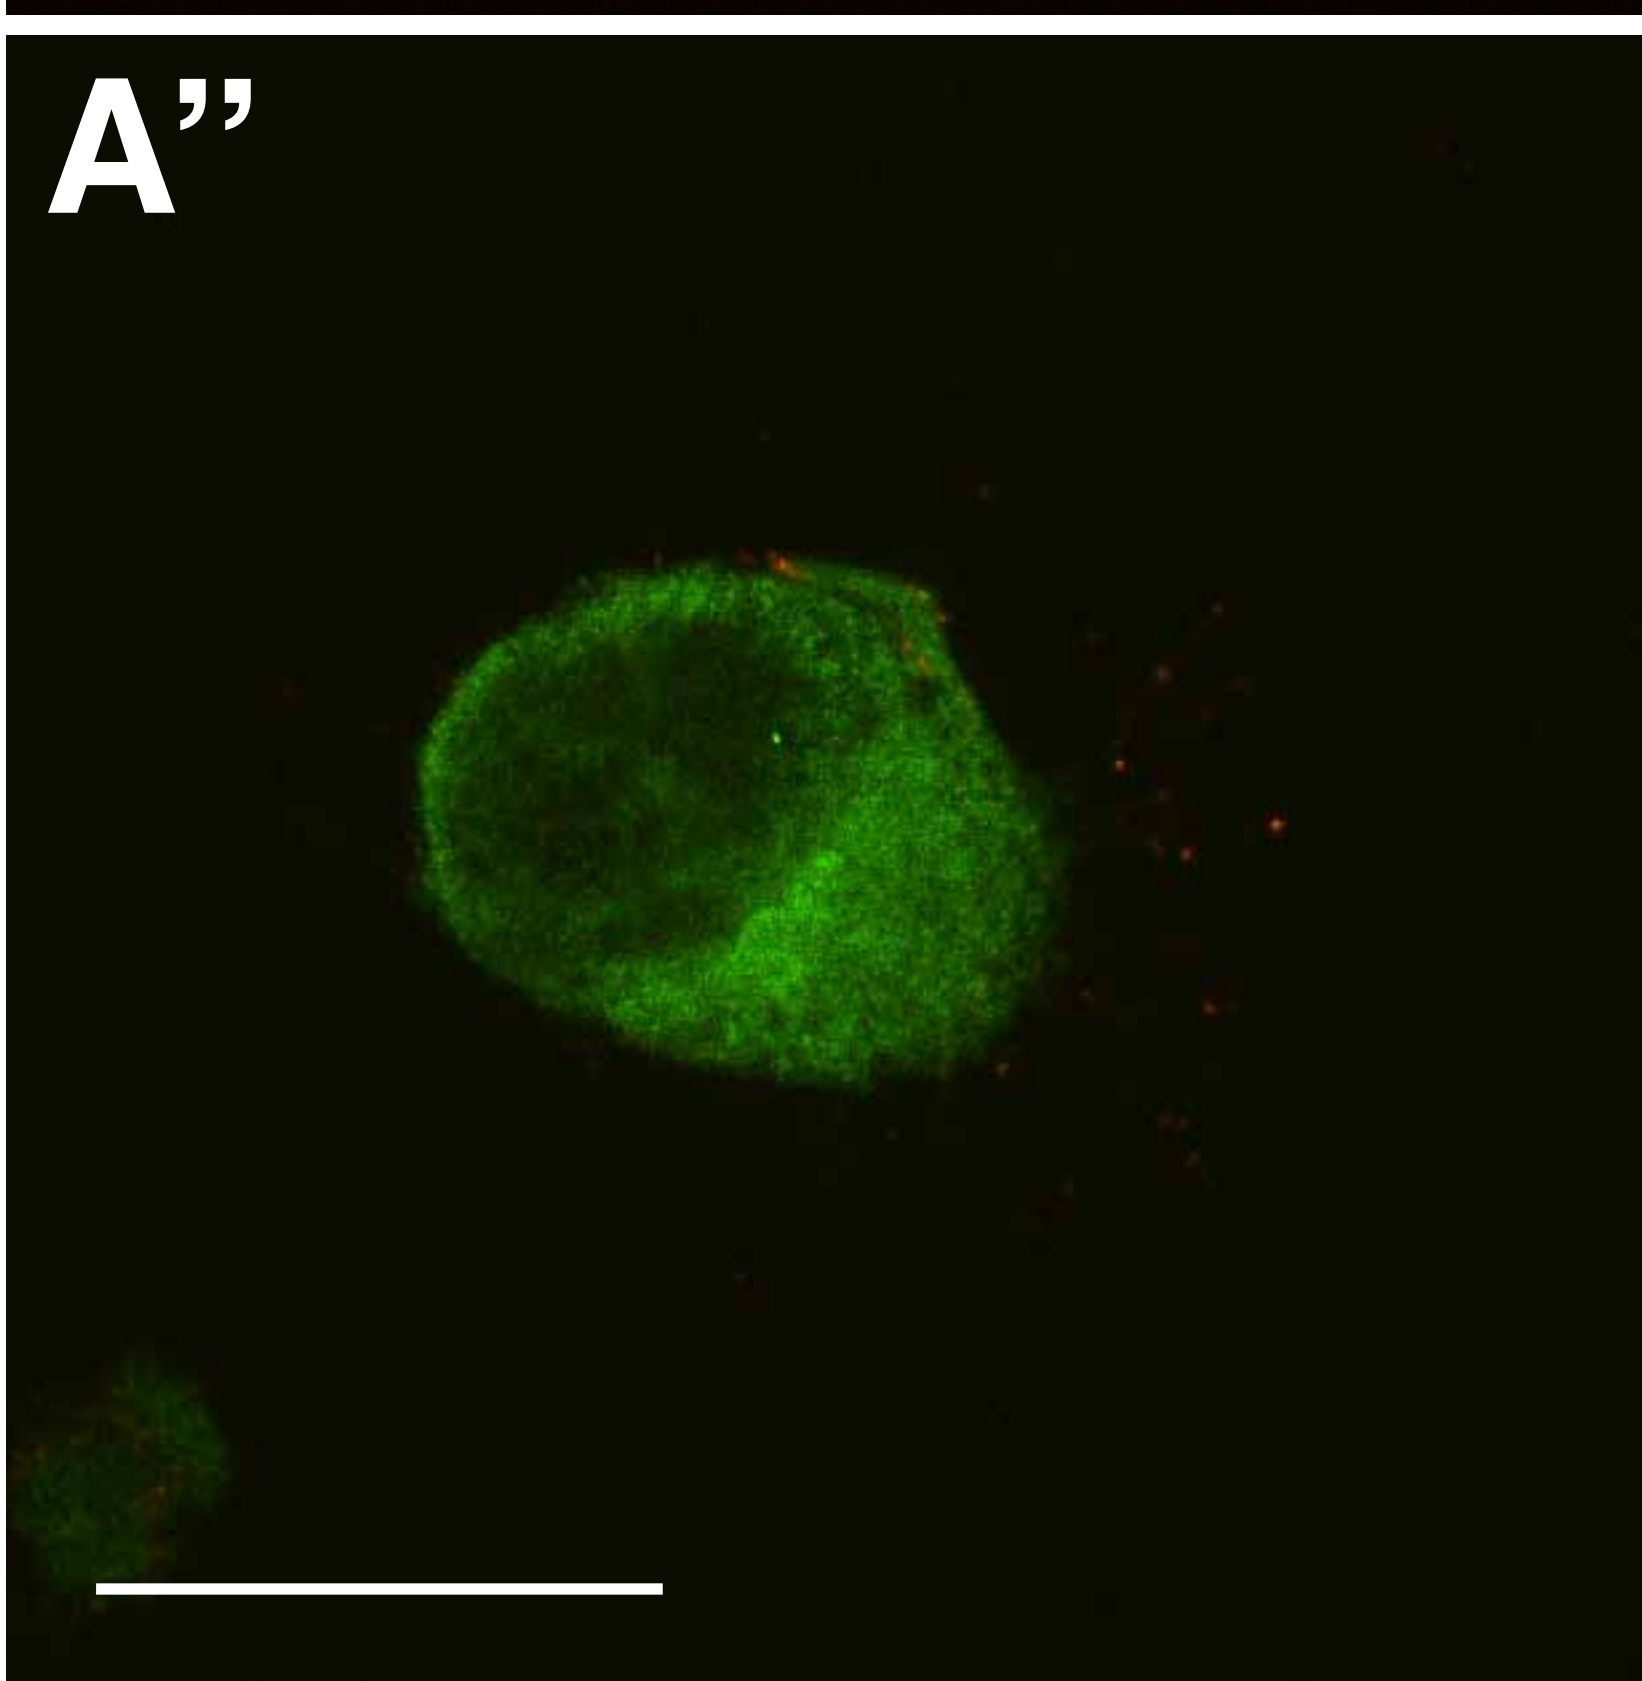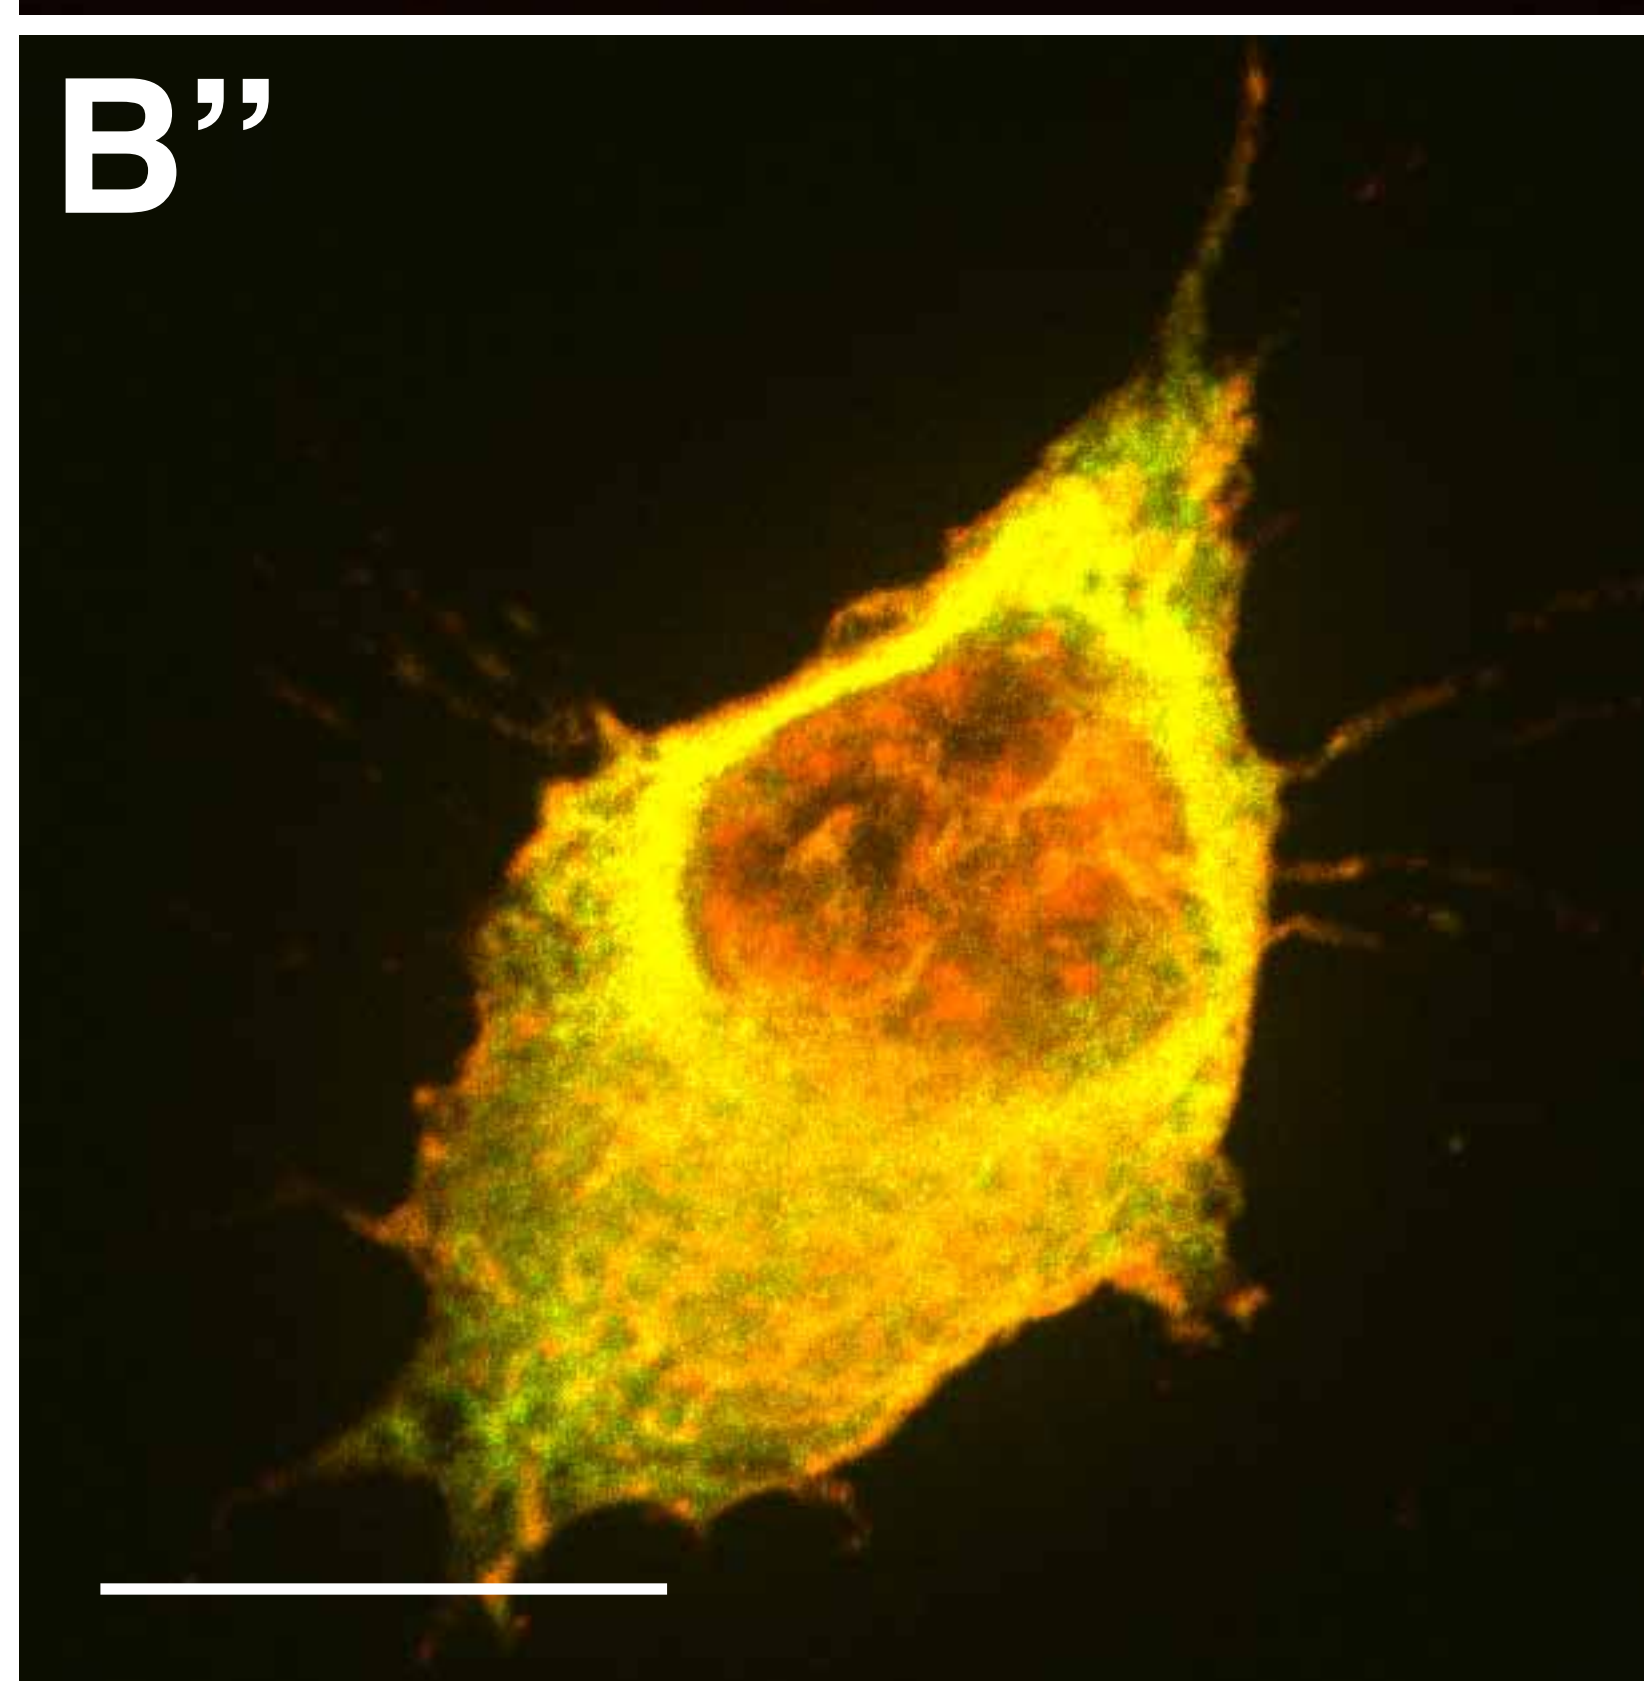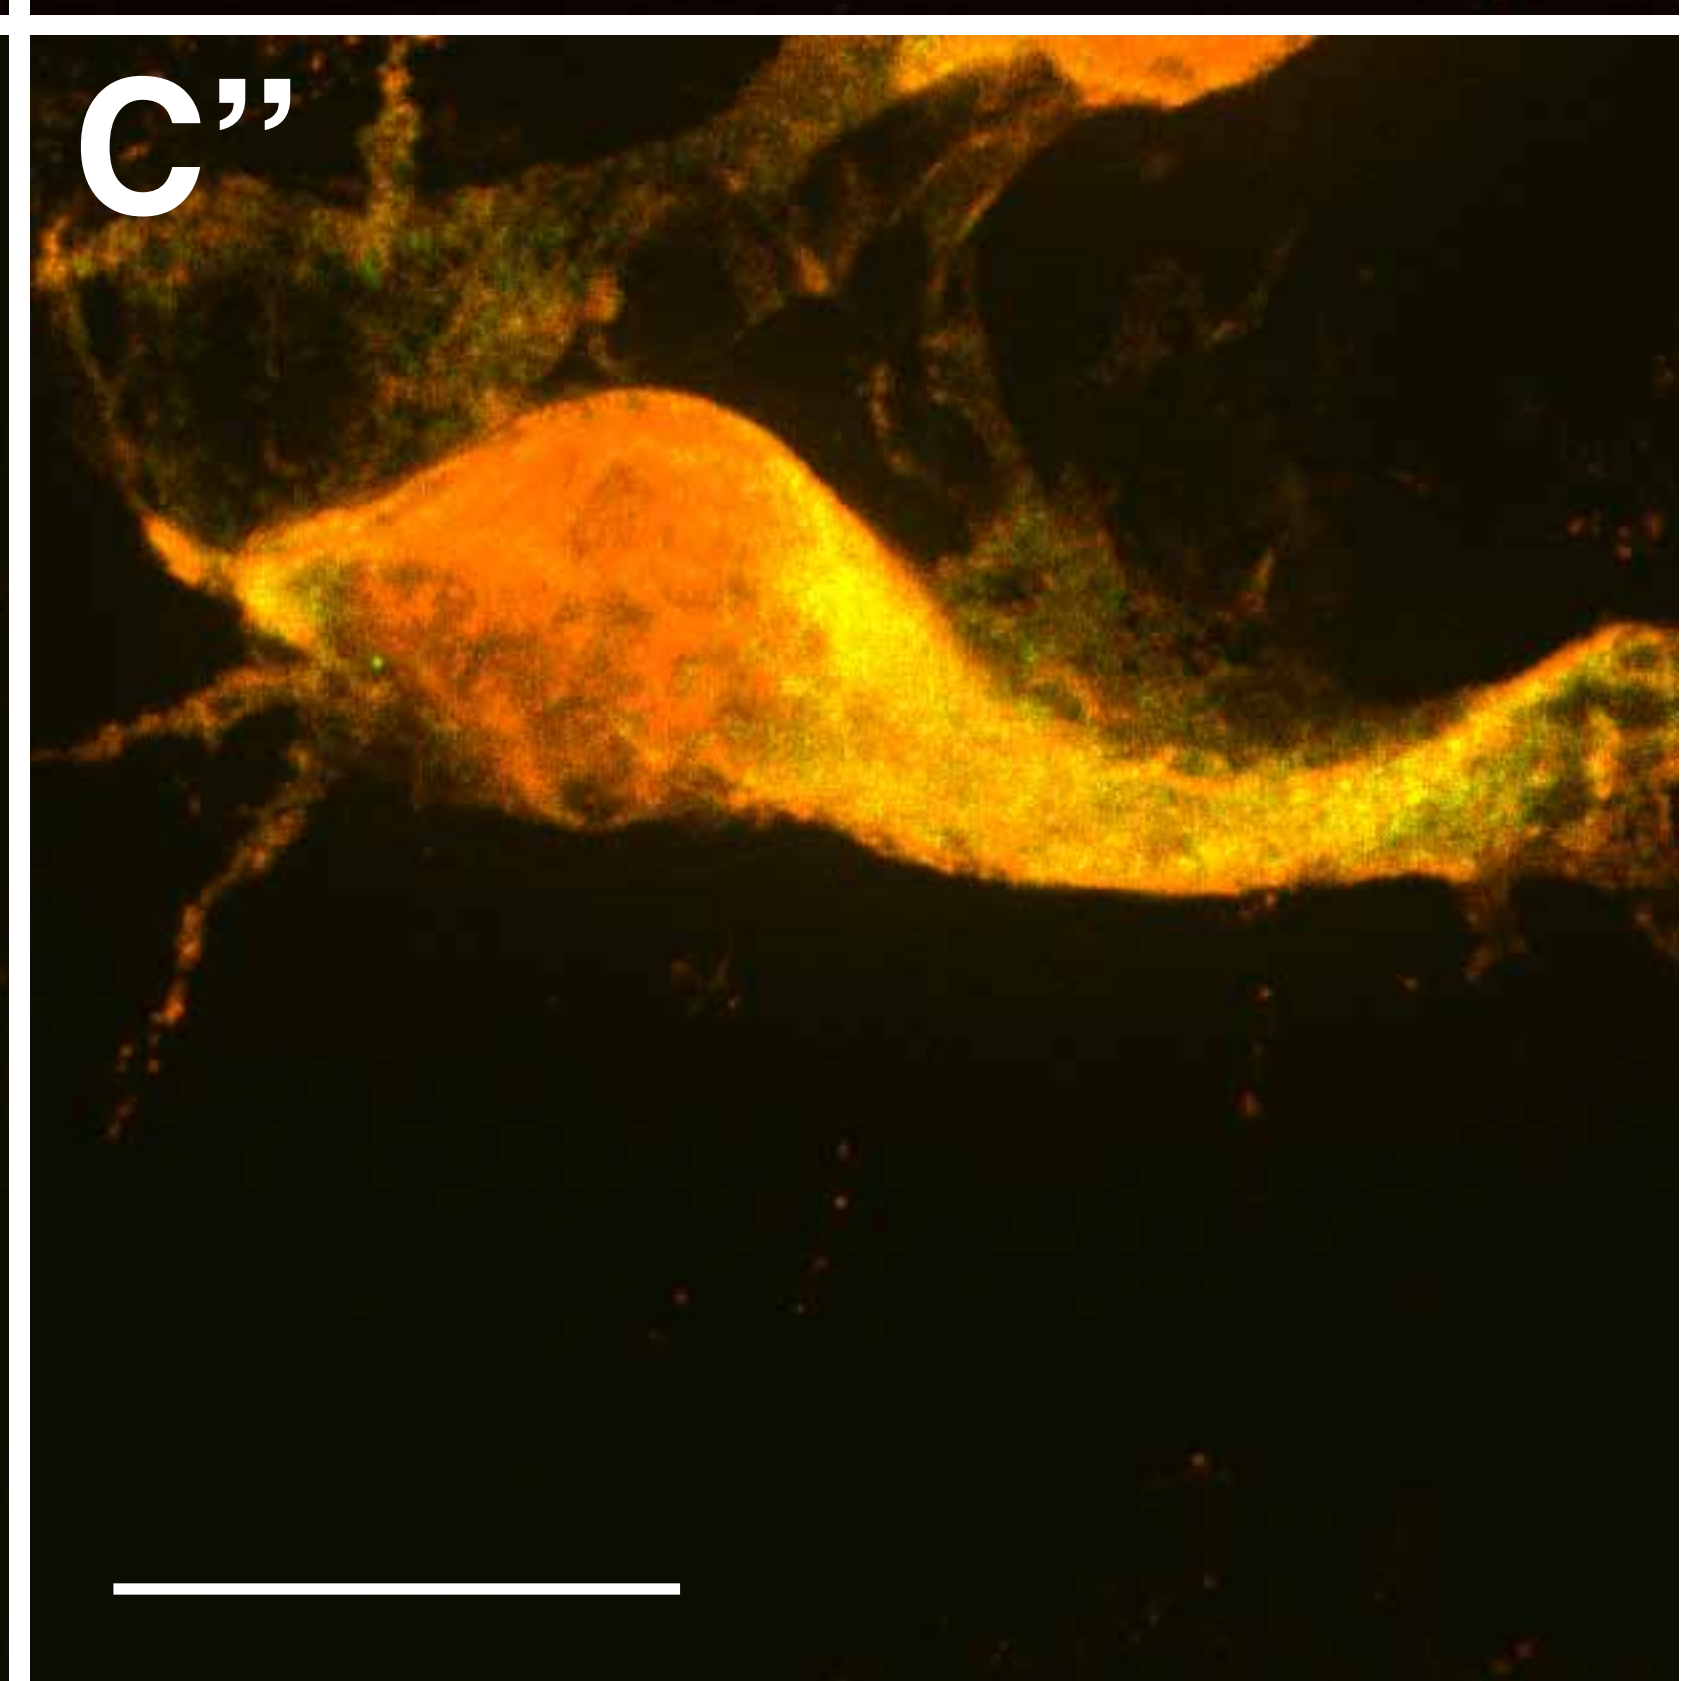

Supplement: supp [file elife_poa_e08493_Figure_1_figure_supplement_1.pdf › elife_poa_e08493_Figure_1_figure_supplement_1.pdf]

HA-AR25Q  
pcDNA3.1  
+DHT

HA-AR25Q  
FLAG-NLK-WT  
+DHT

HA-AR25Q  
FLAG-NLK-KN  
+DHT

$\alpha$ -AR

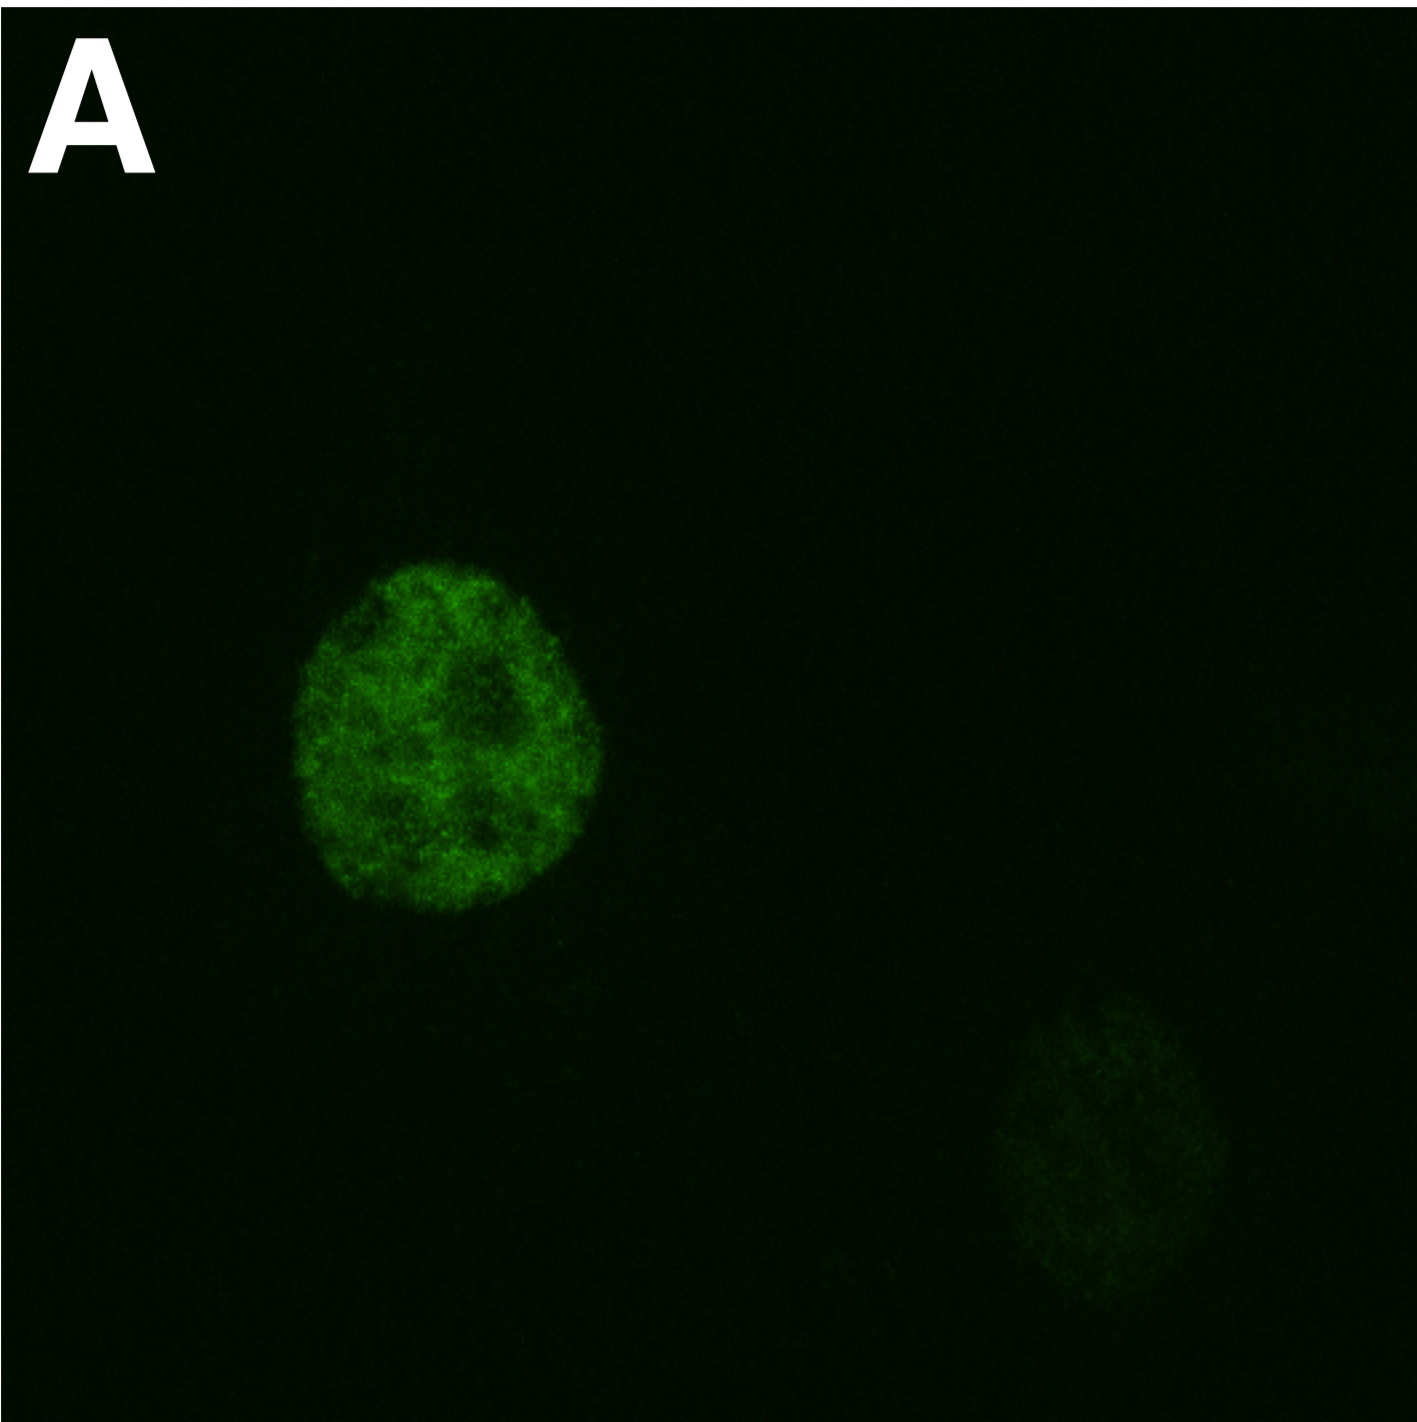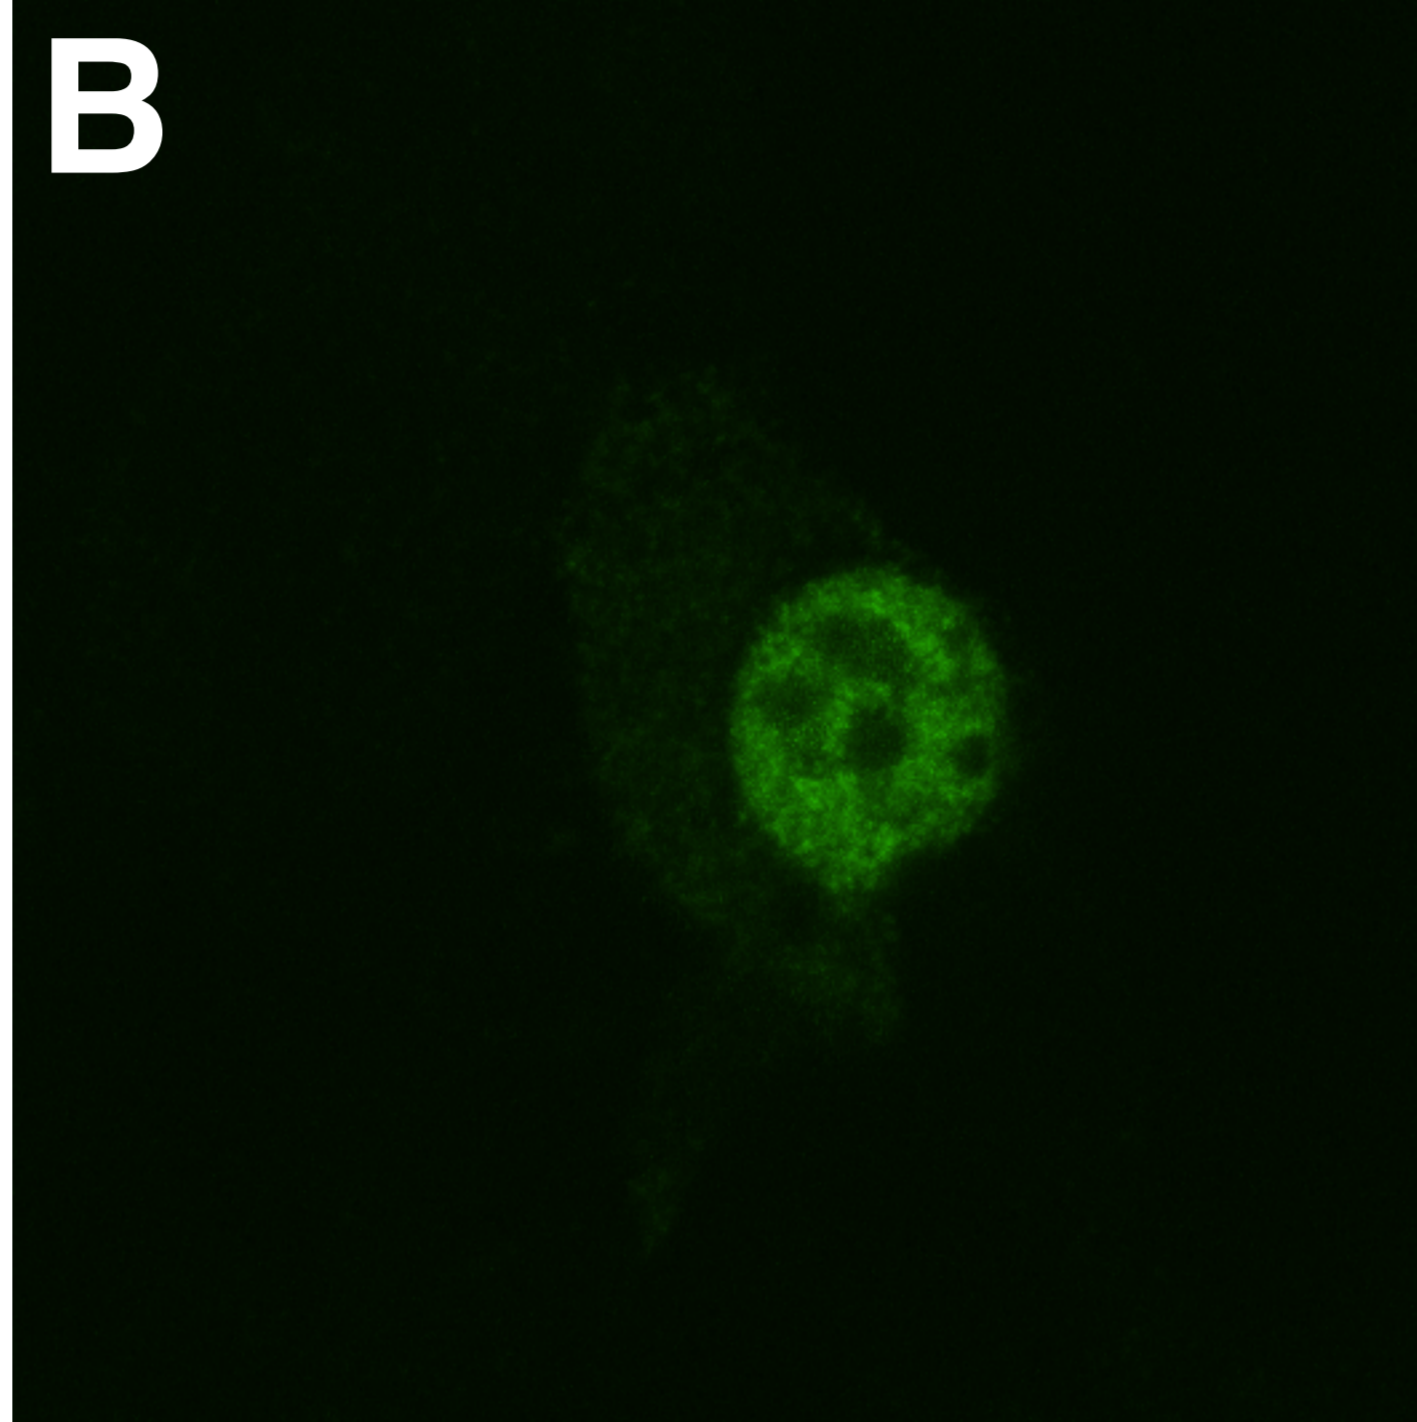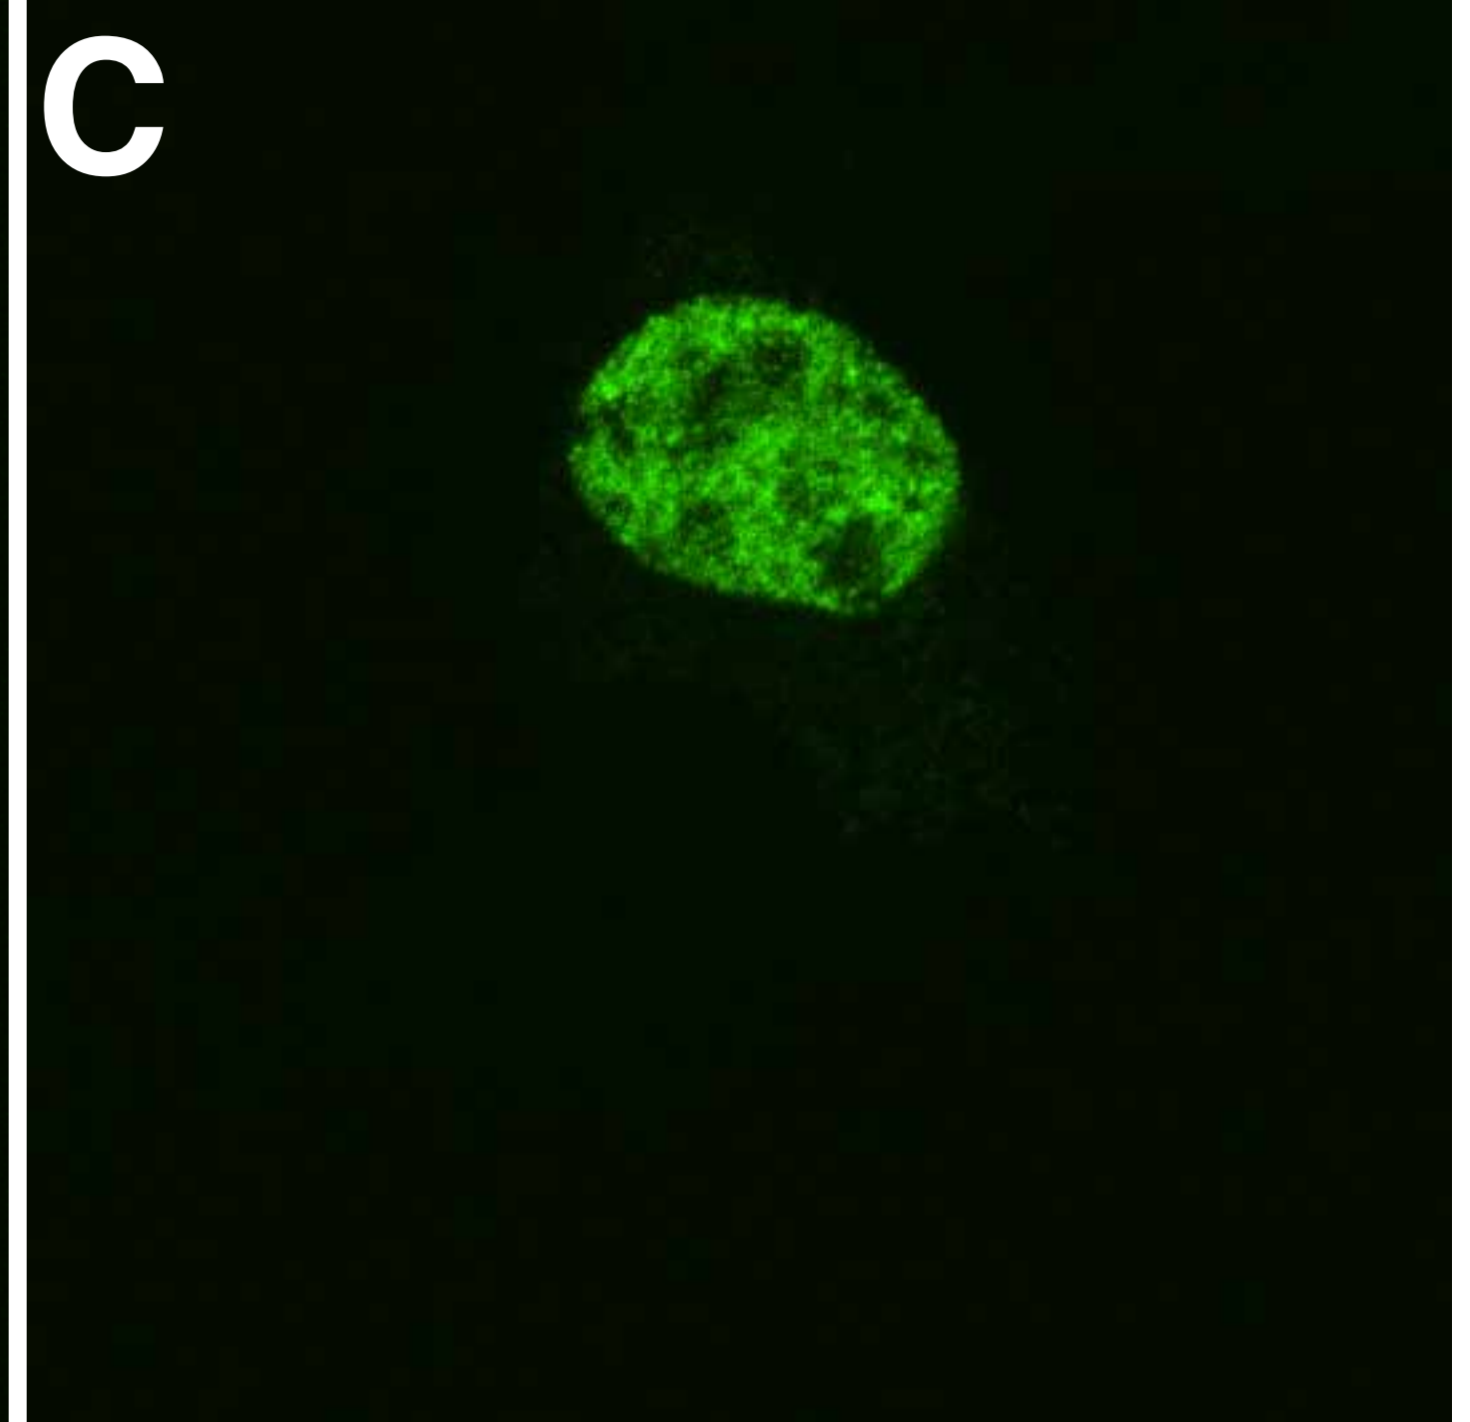

$\alpha$ -FLAG (NLK)

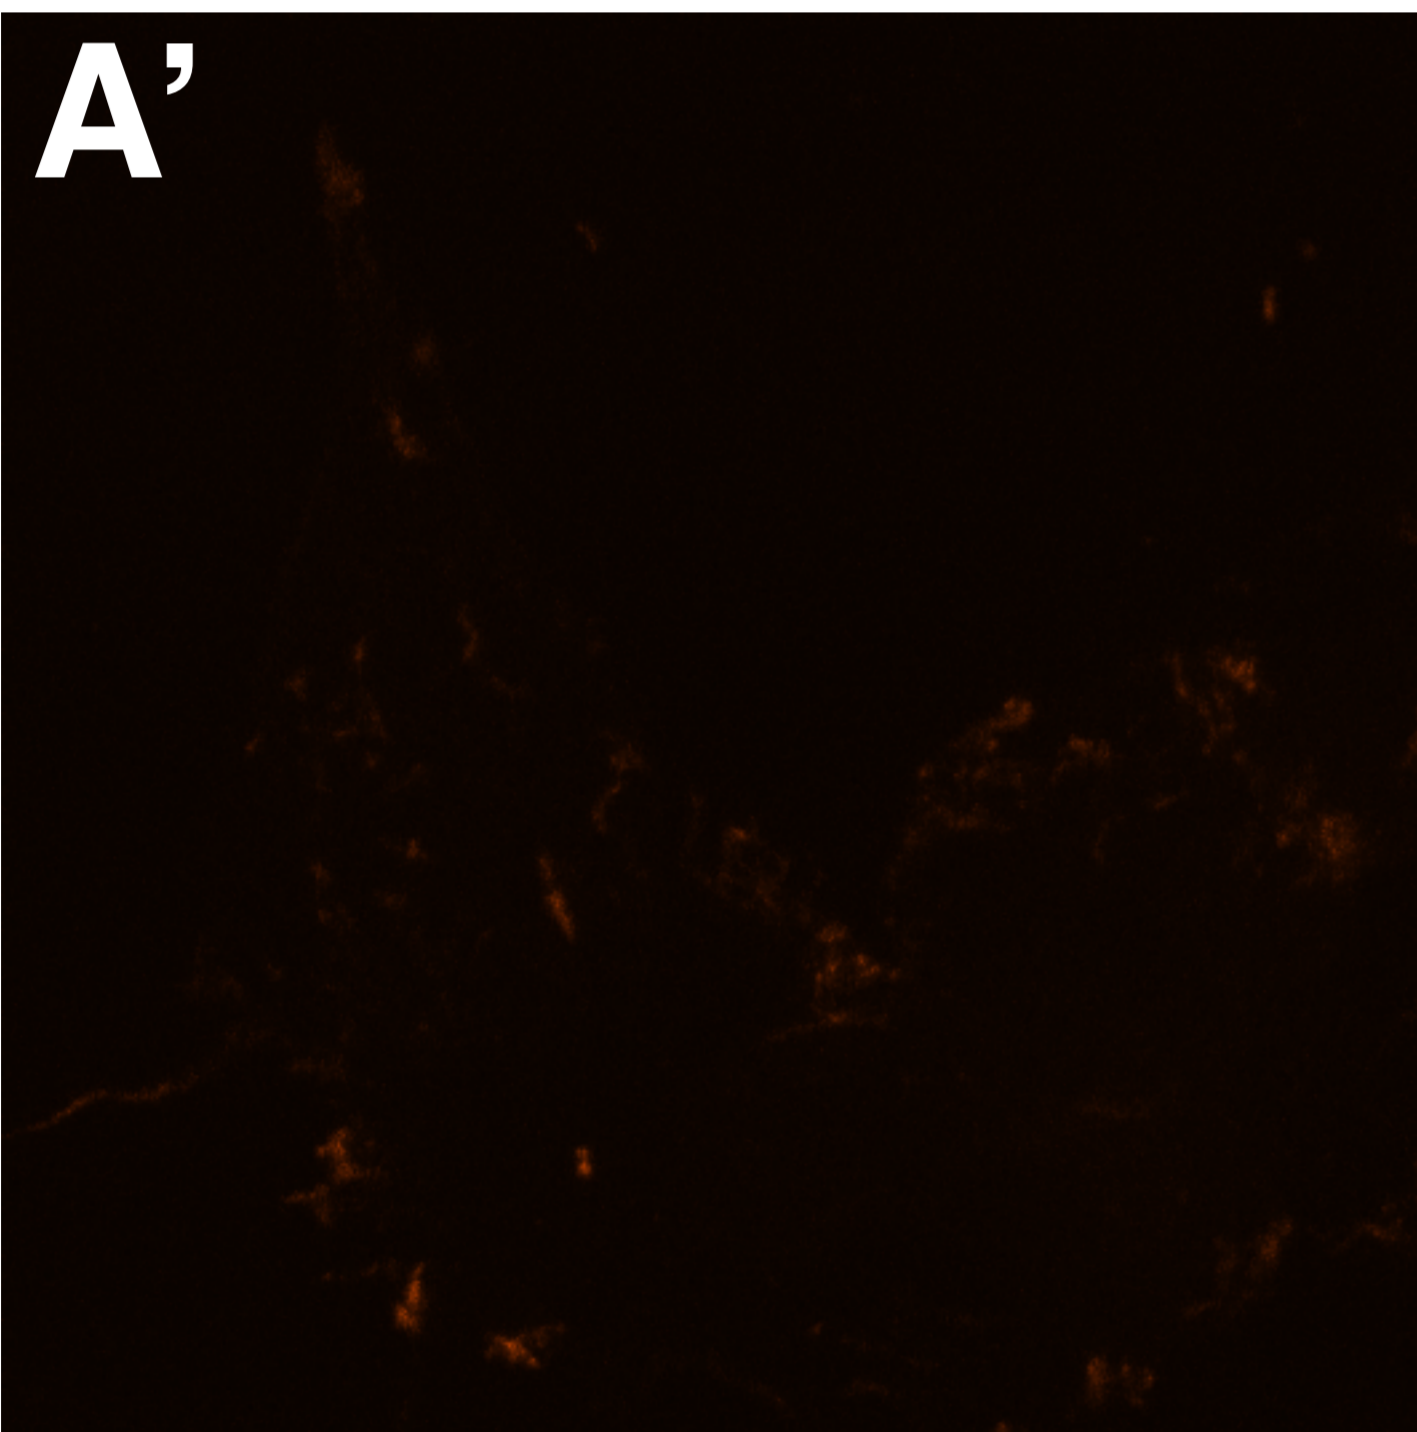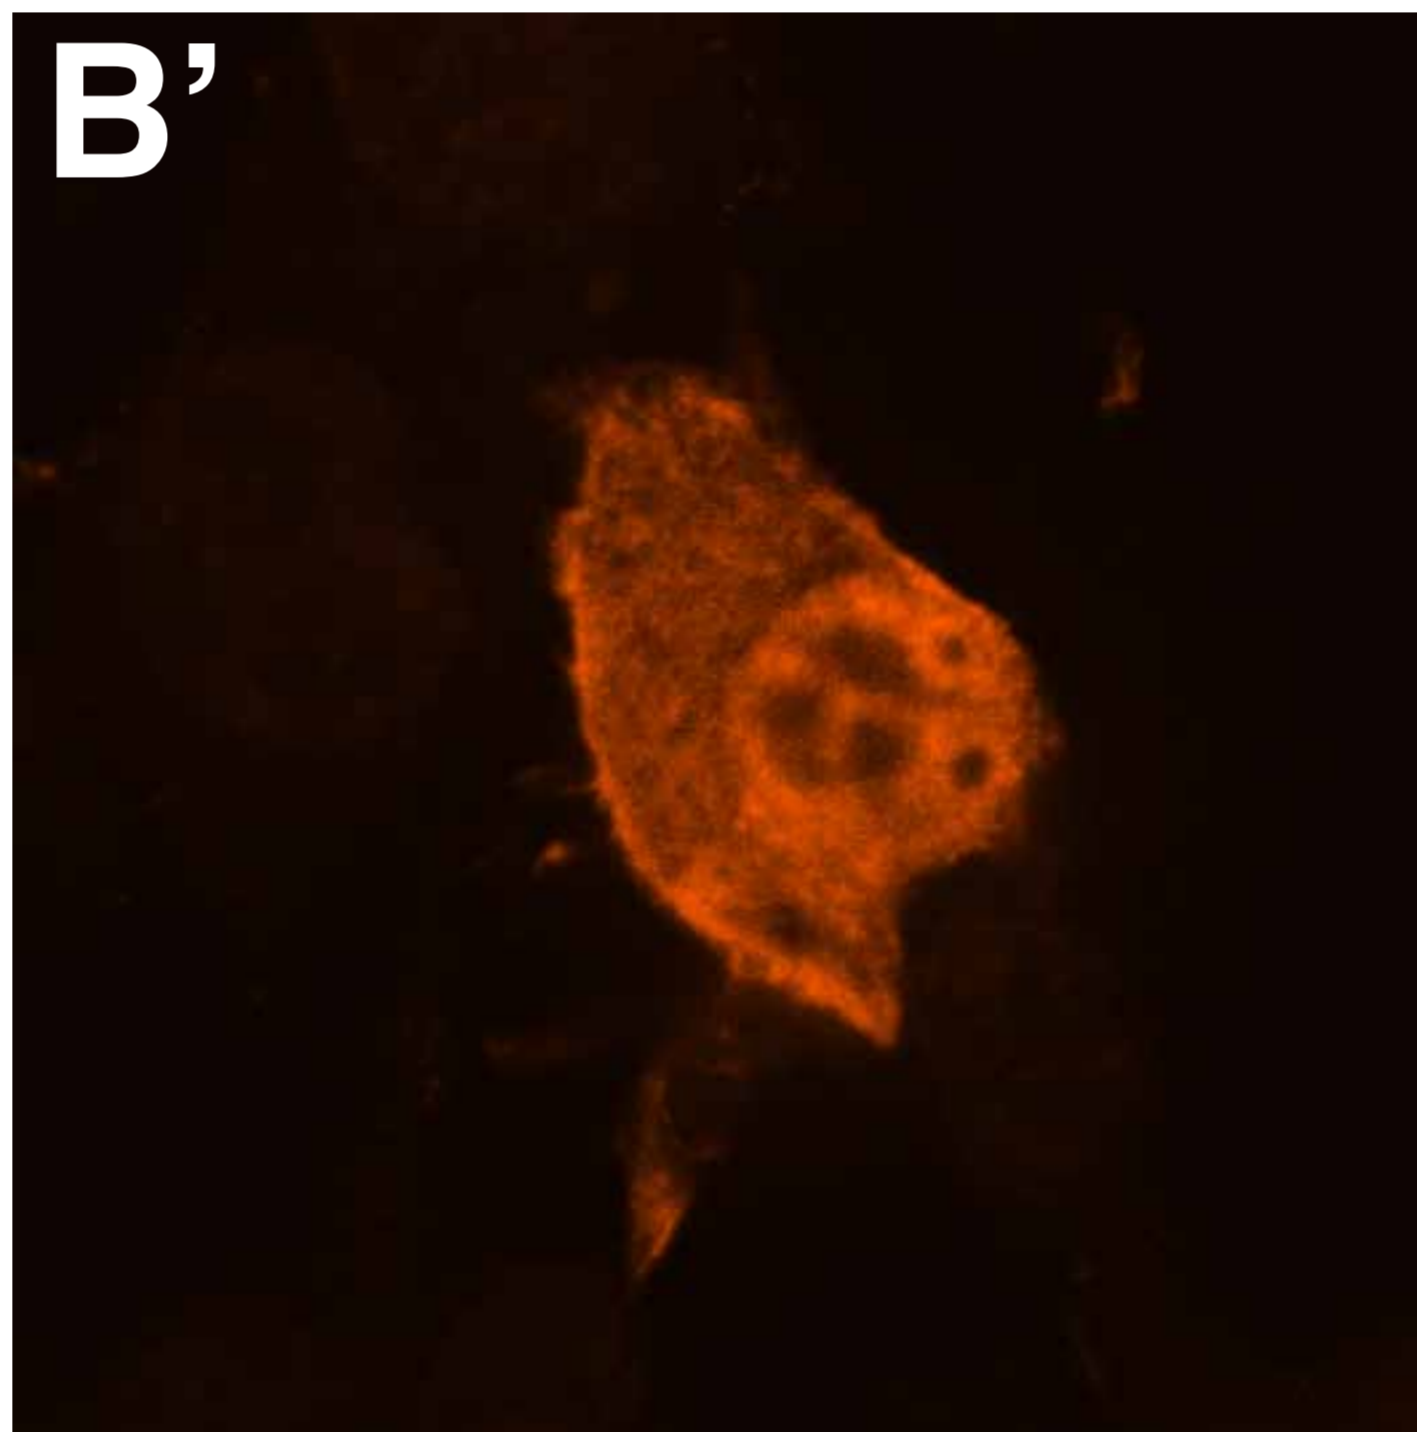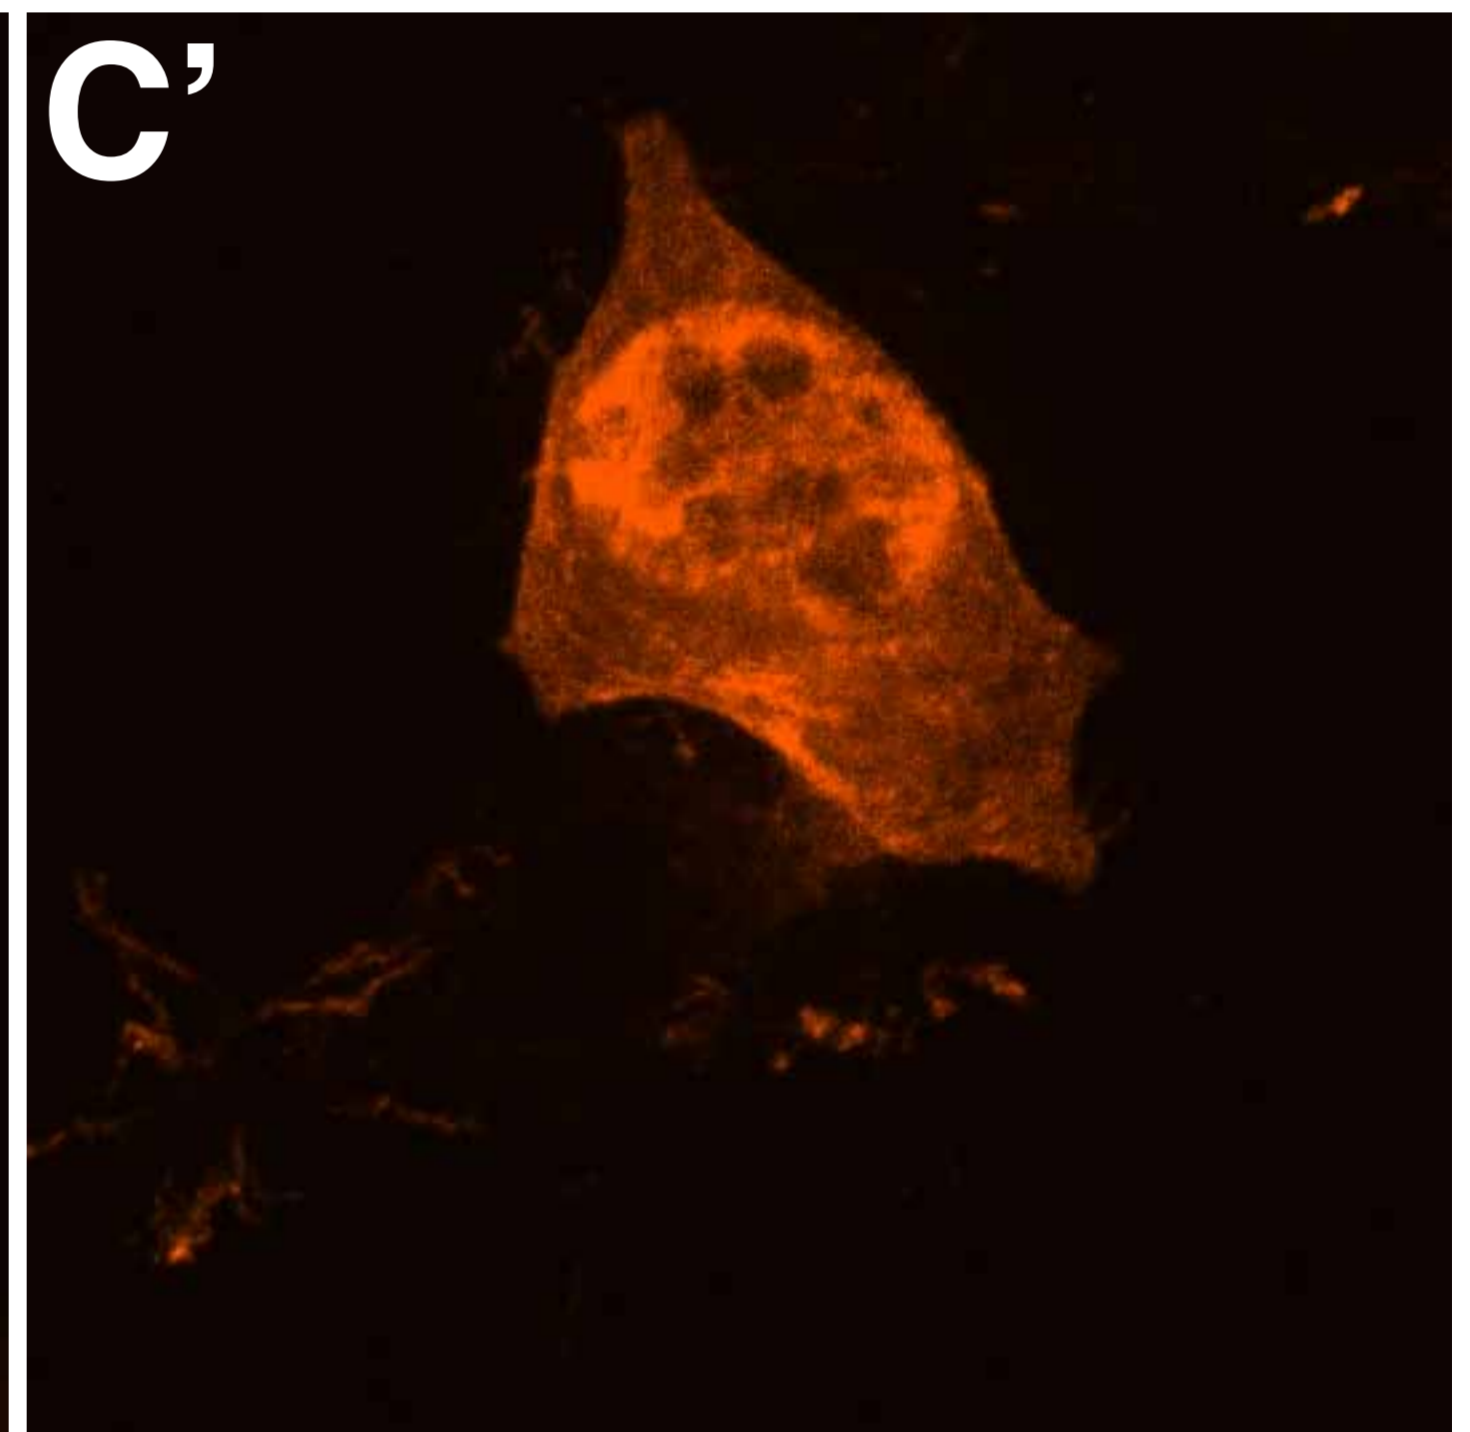

merge

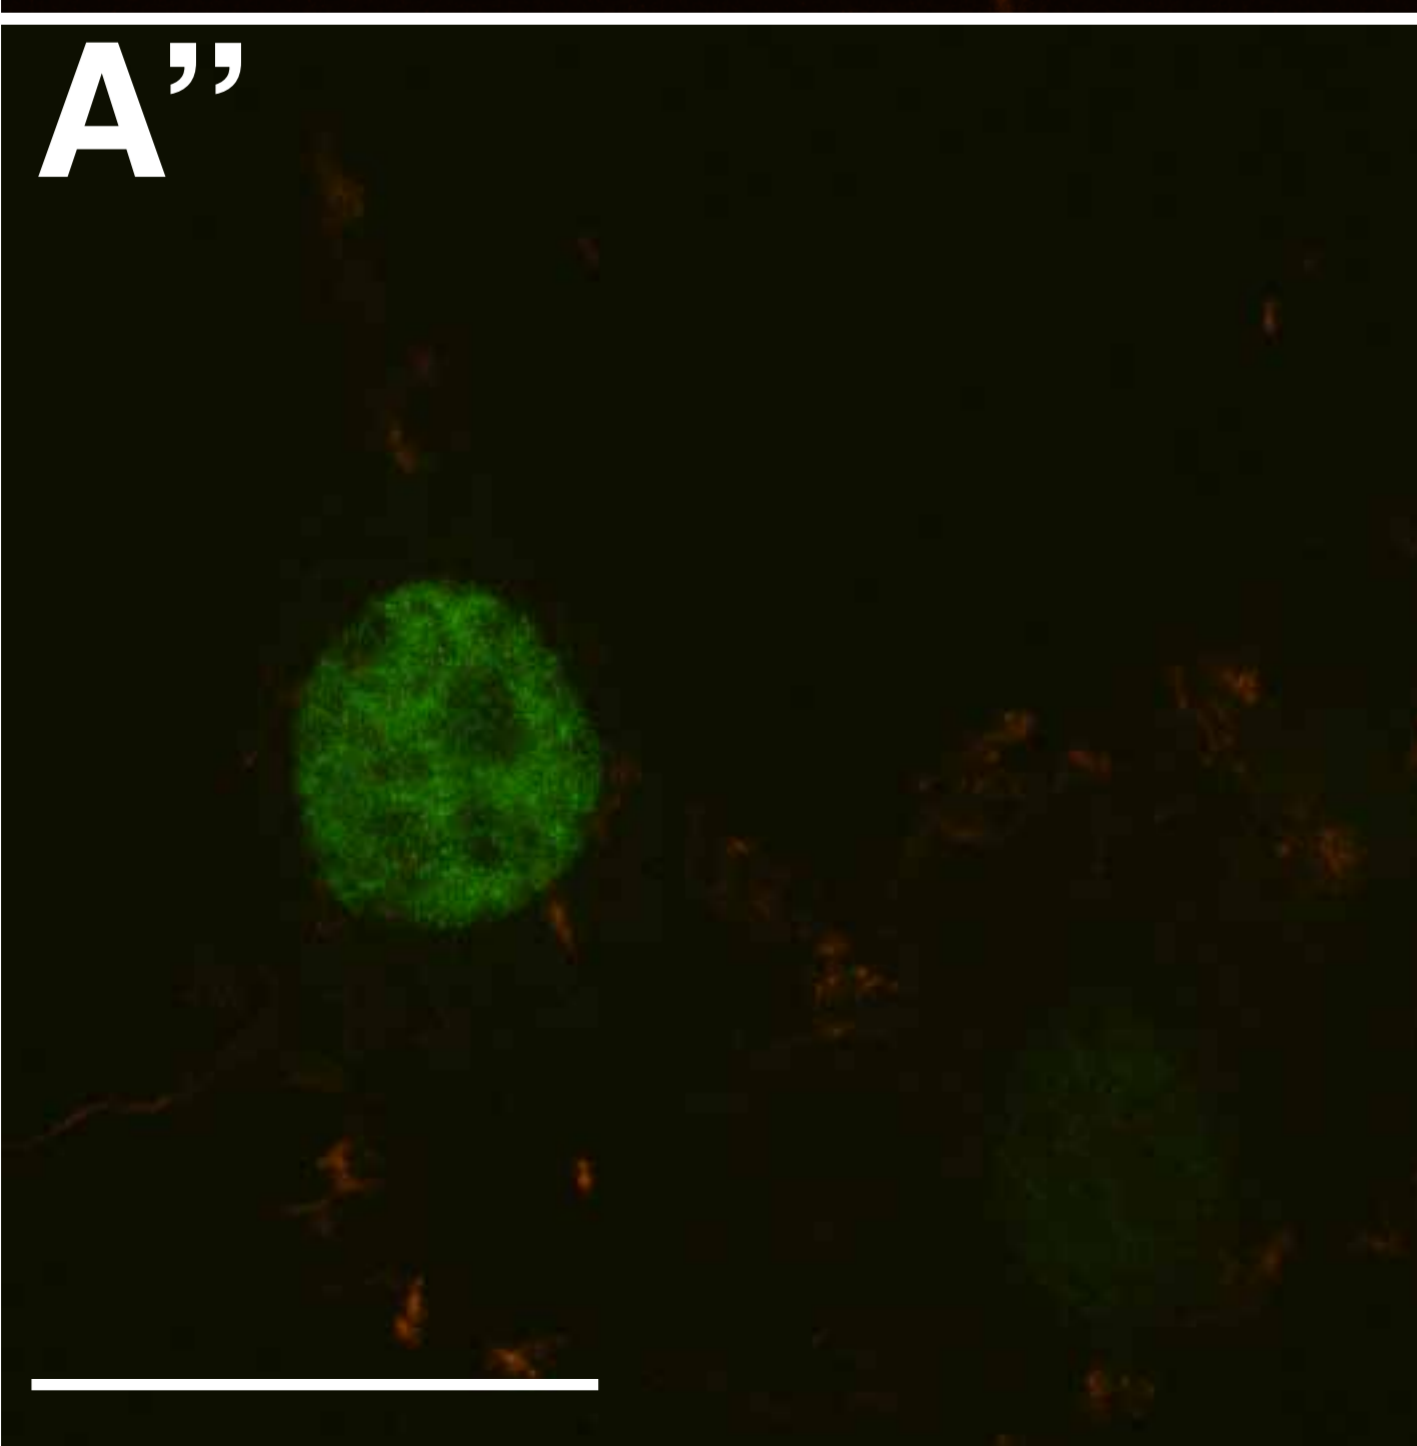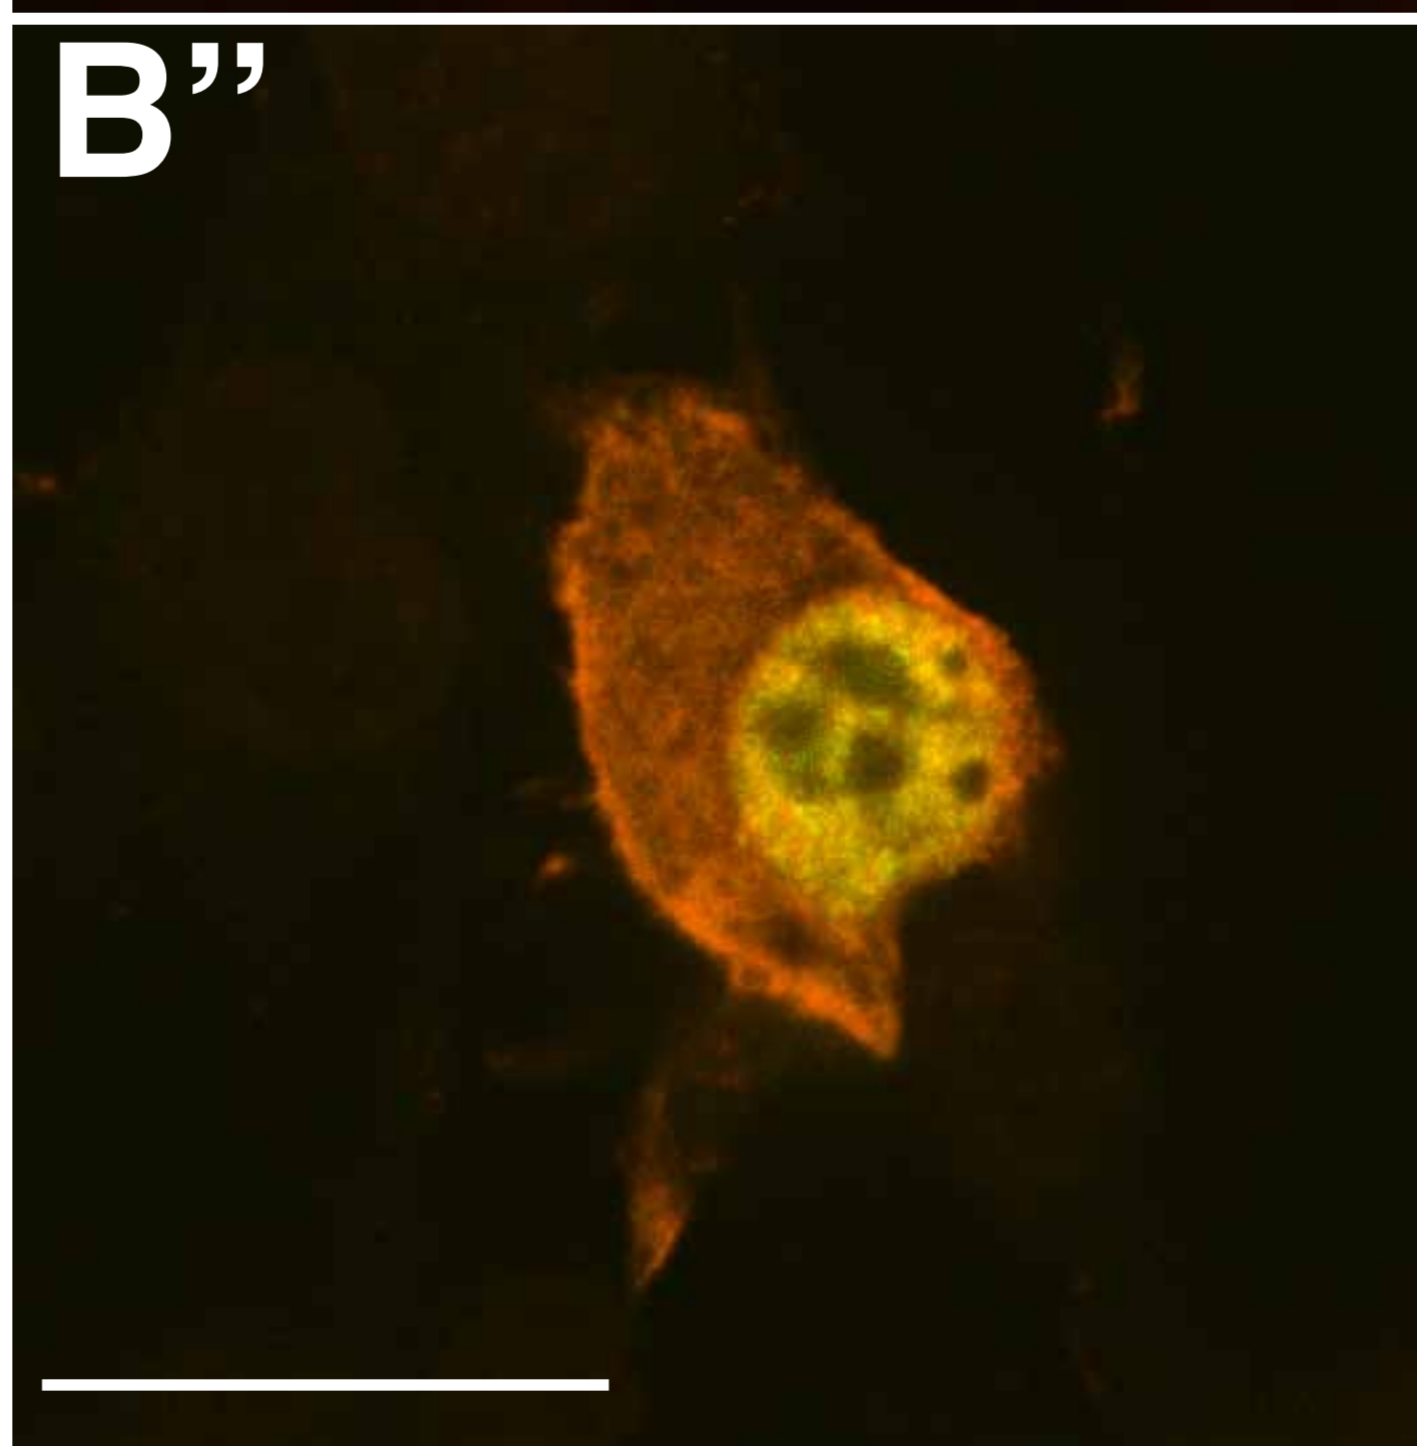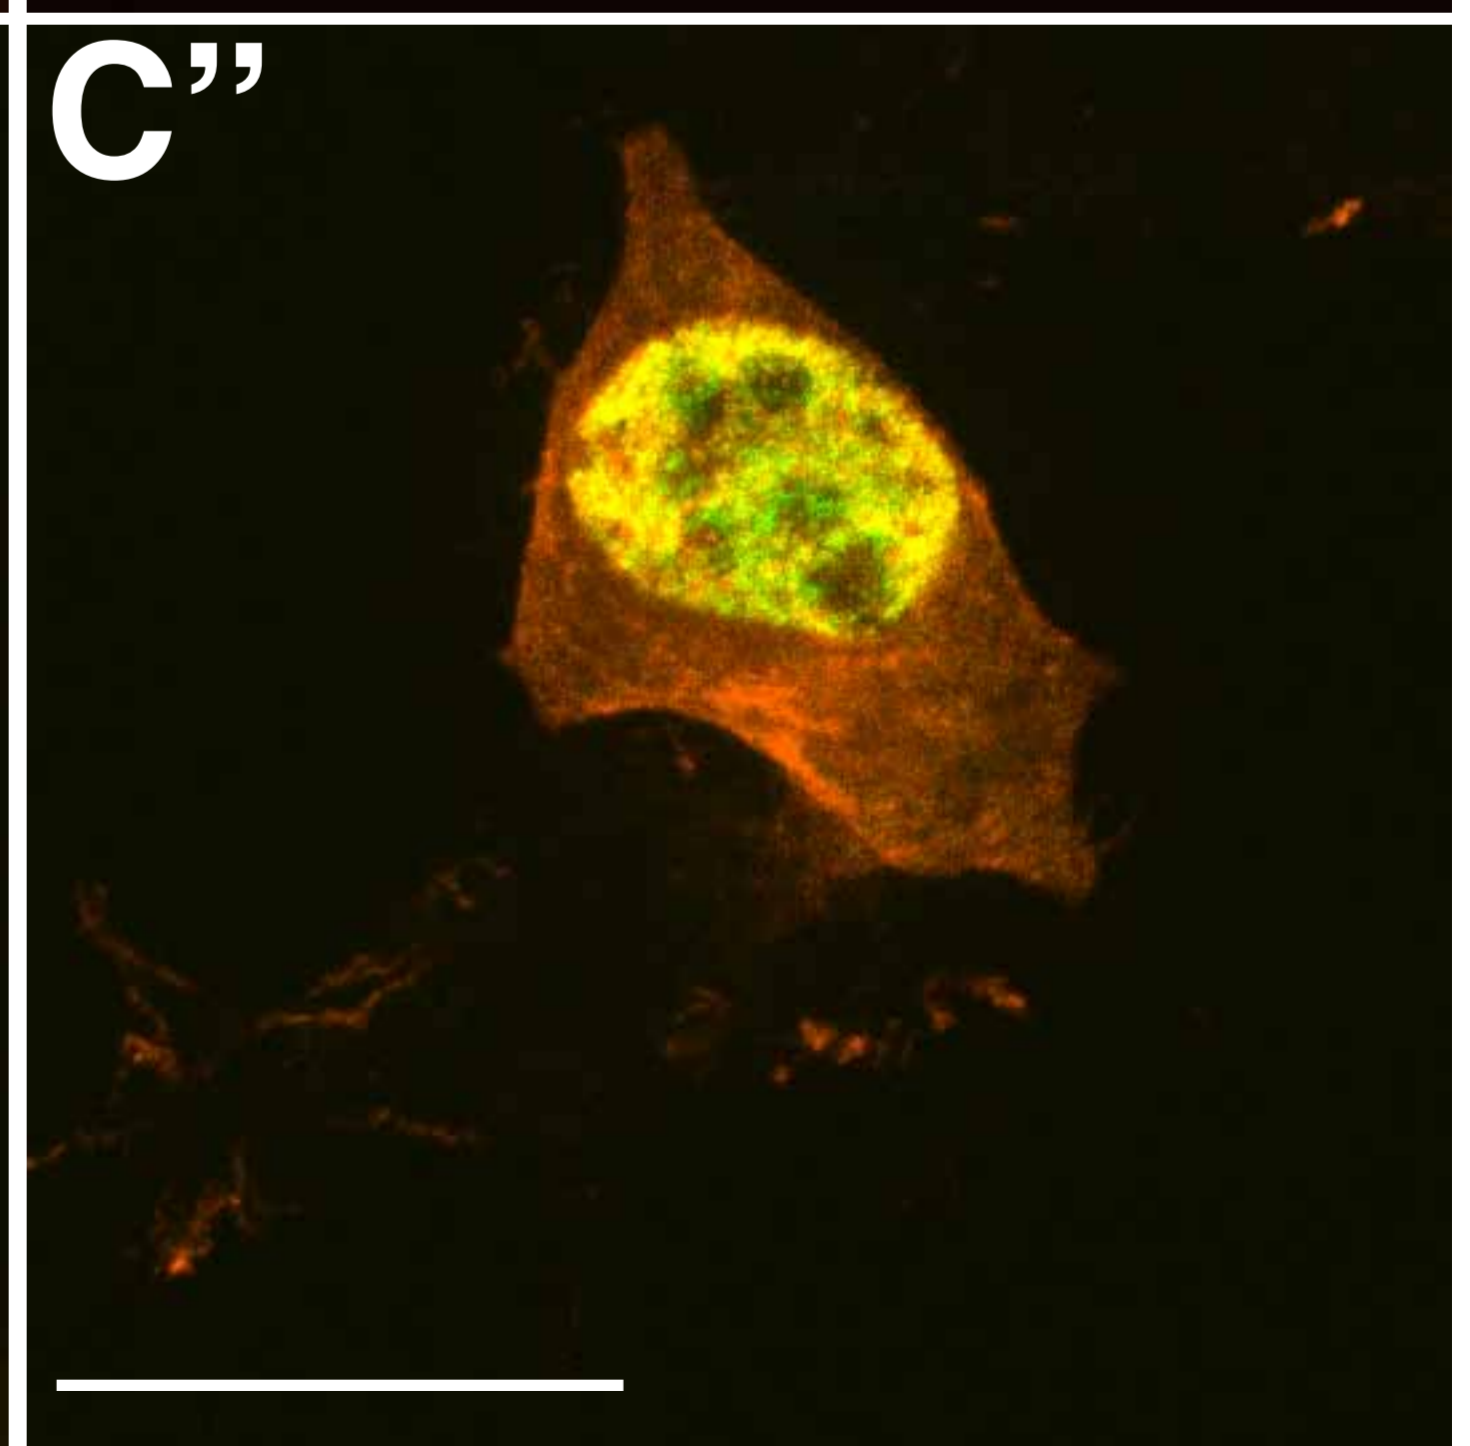

Supplement: supp [file elife_poa_e08493_Figure_1_figure_supplement_3.pdf › elife_poa_e08493_Figure_1_figure_supplement_3.pdf]

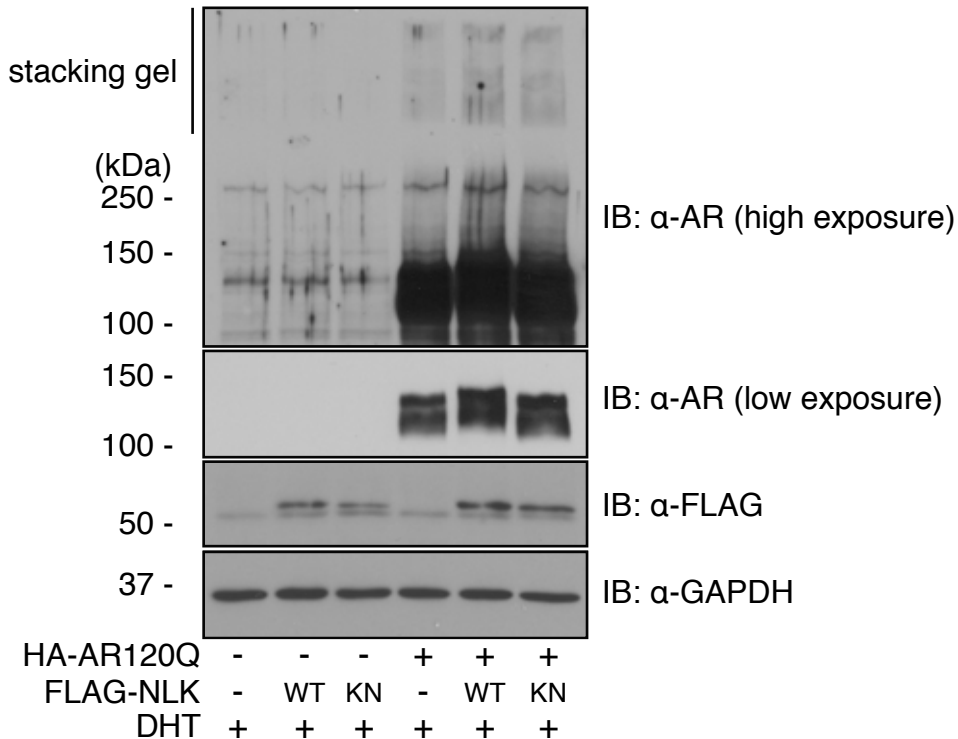

Supplement: supp [file elife_poa_e08493_Figure_1_figure_supplement_4.pdf › elife_poa_e08493_Figure_1_figure_supplement_4.pdf]

- DHT

+ DHT

**A**

**B**

AR14Q

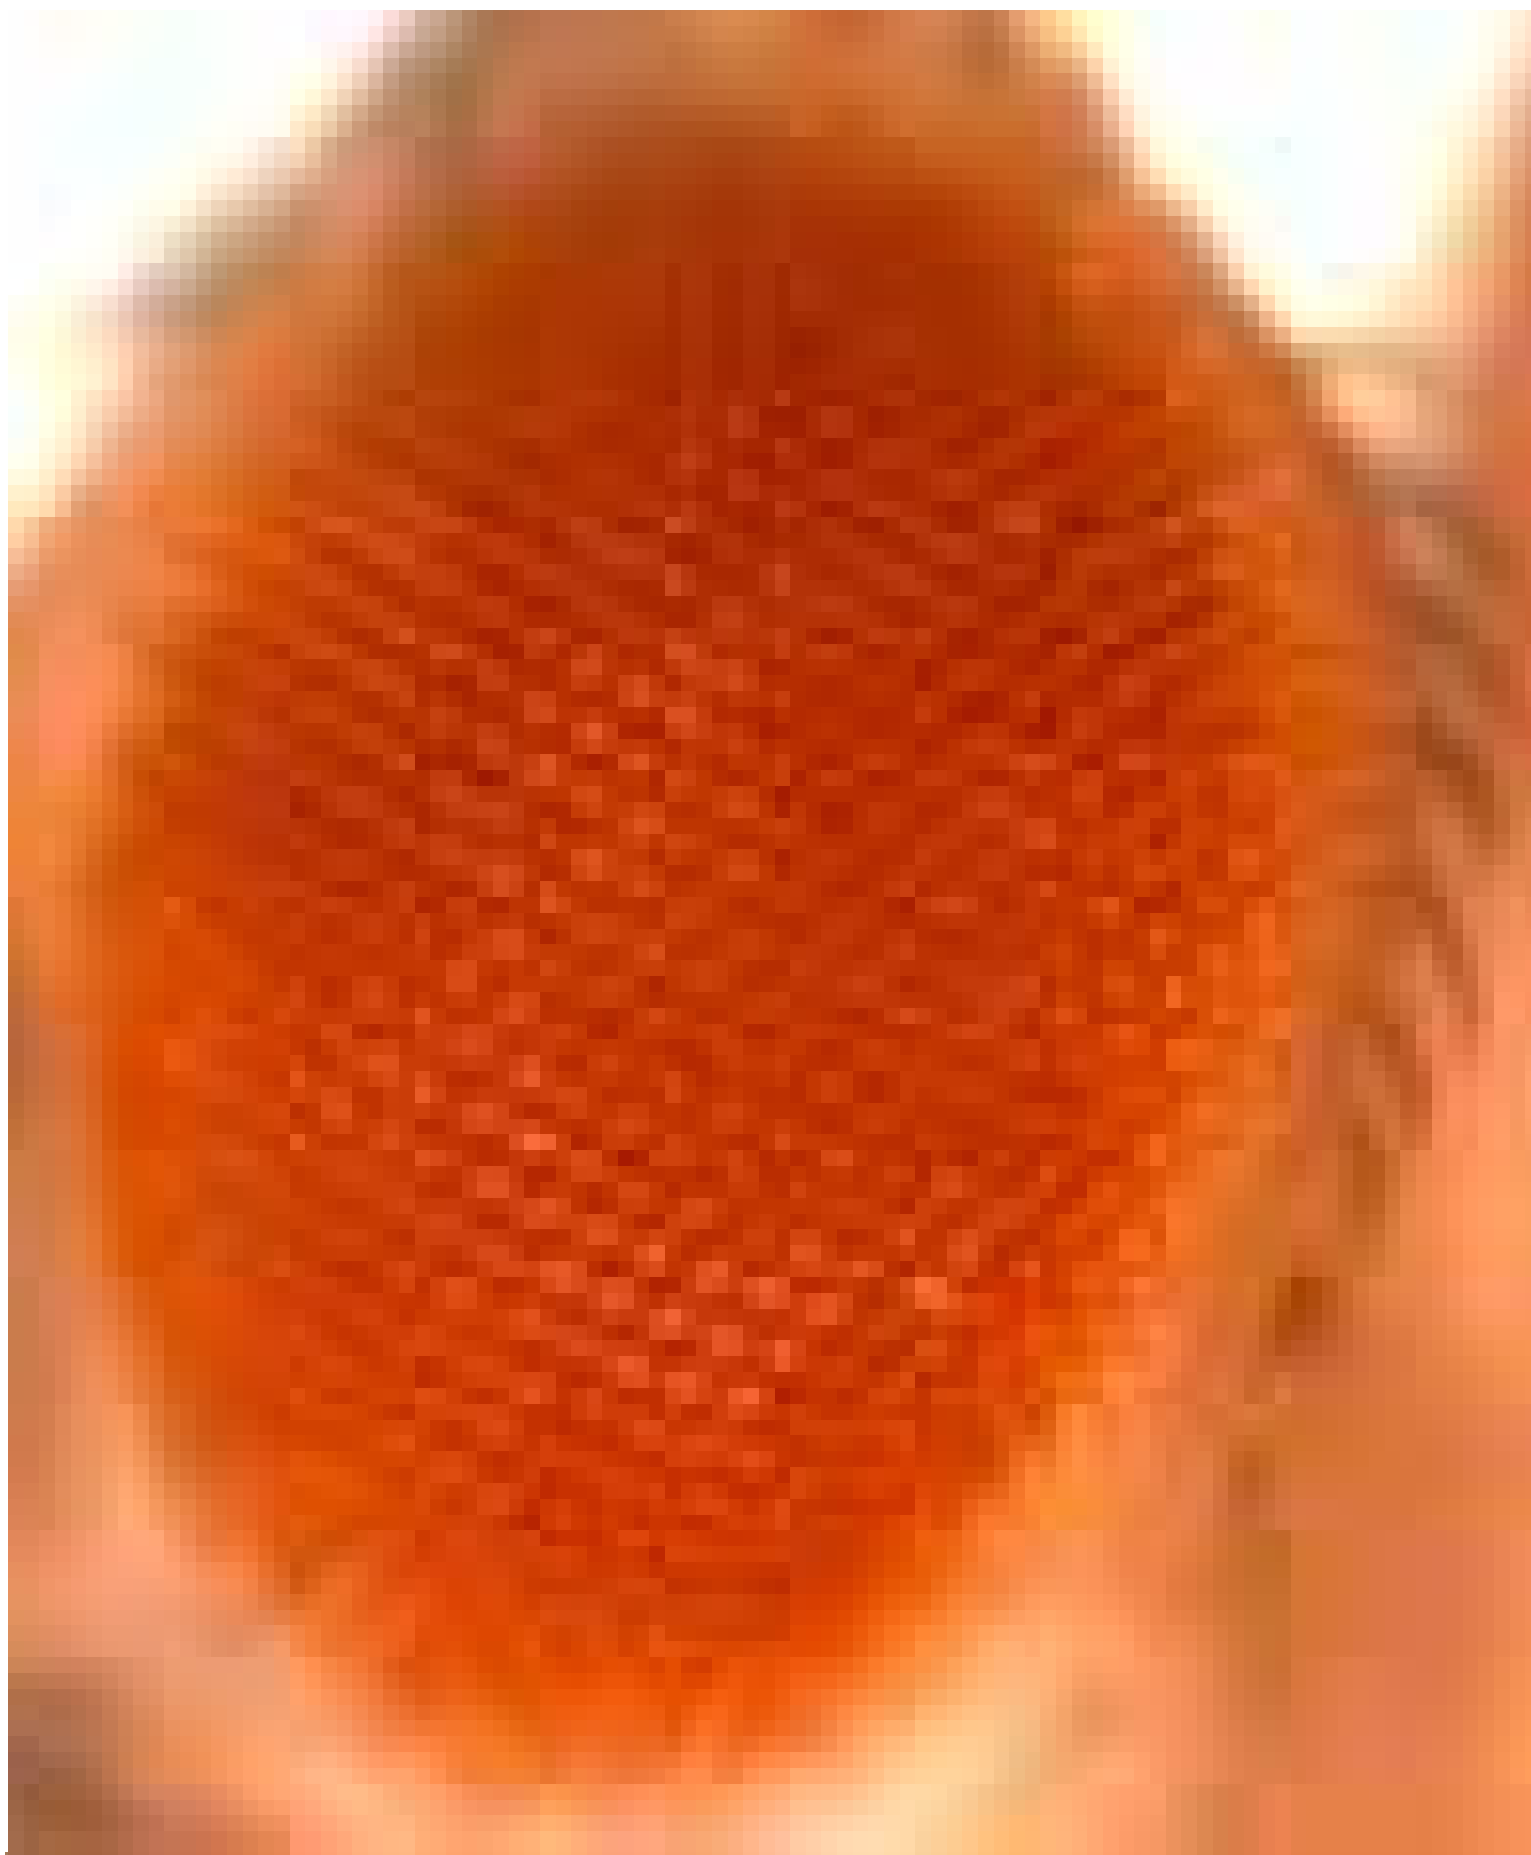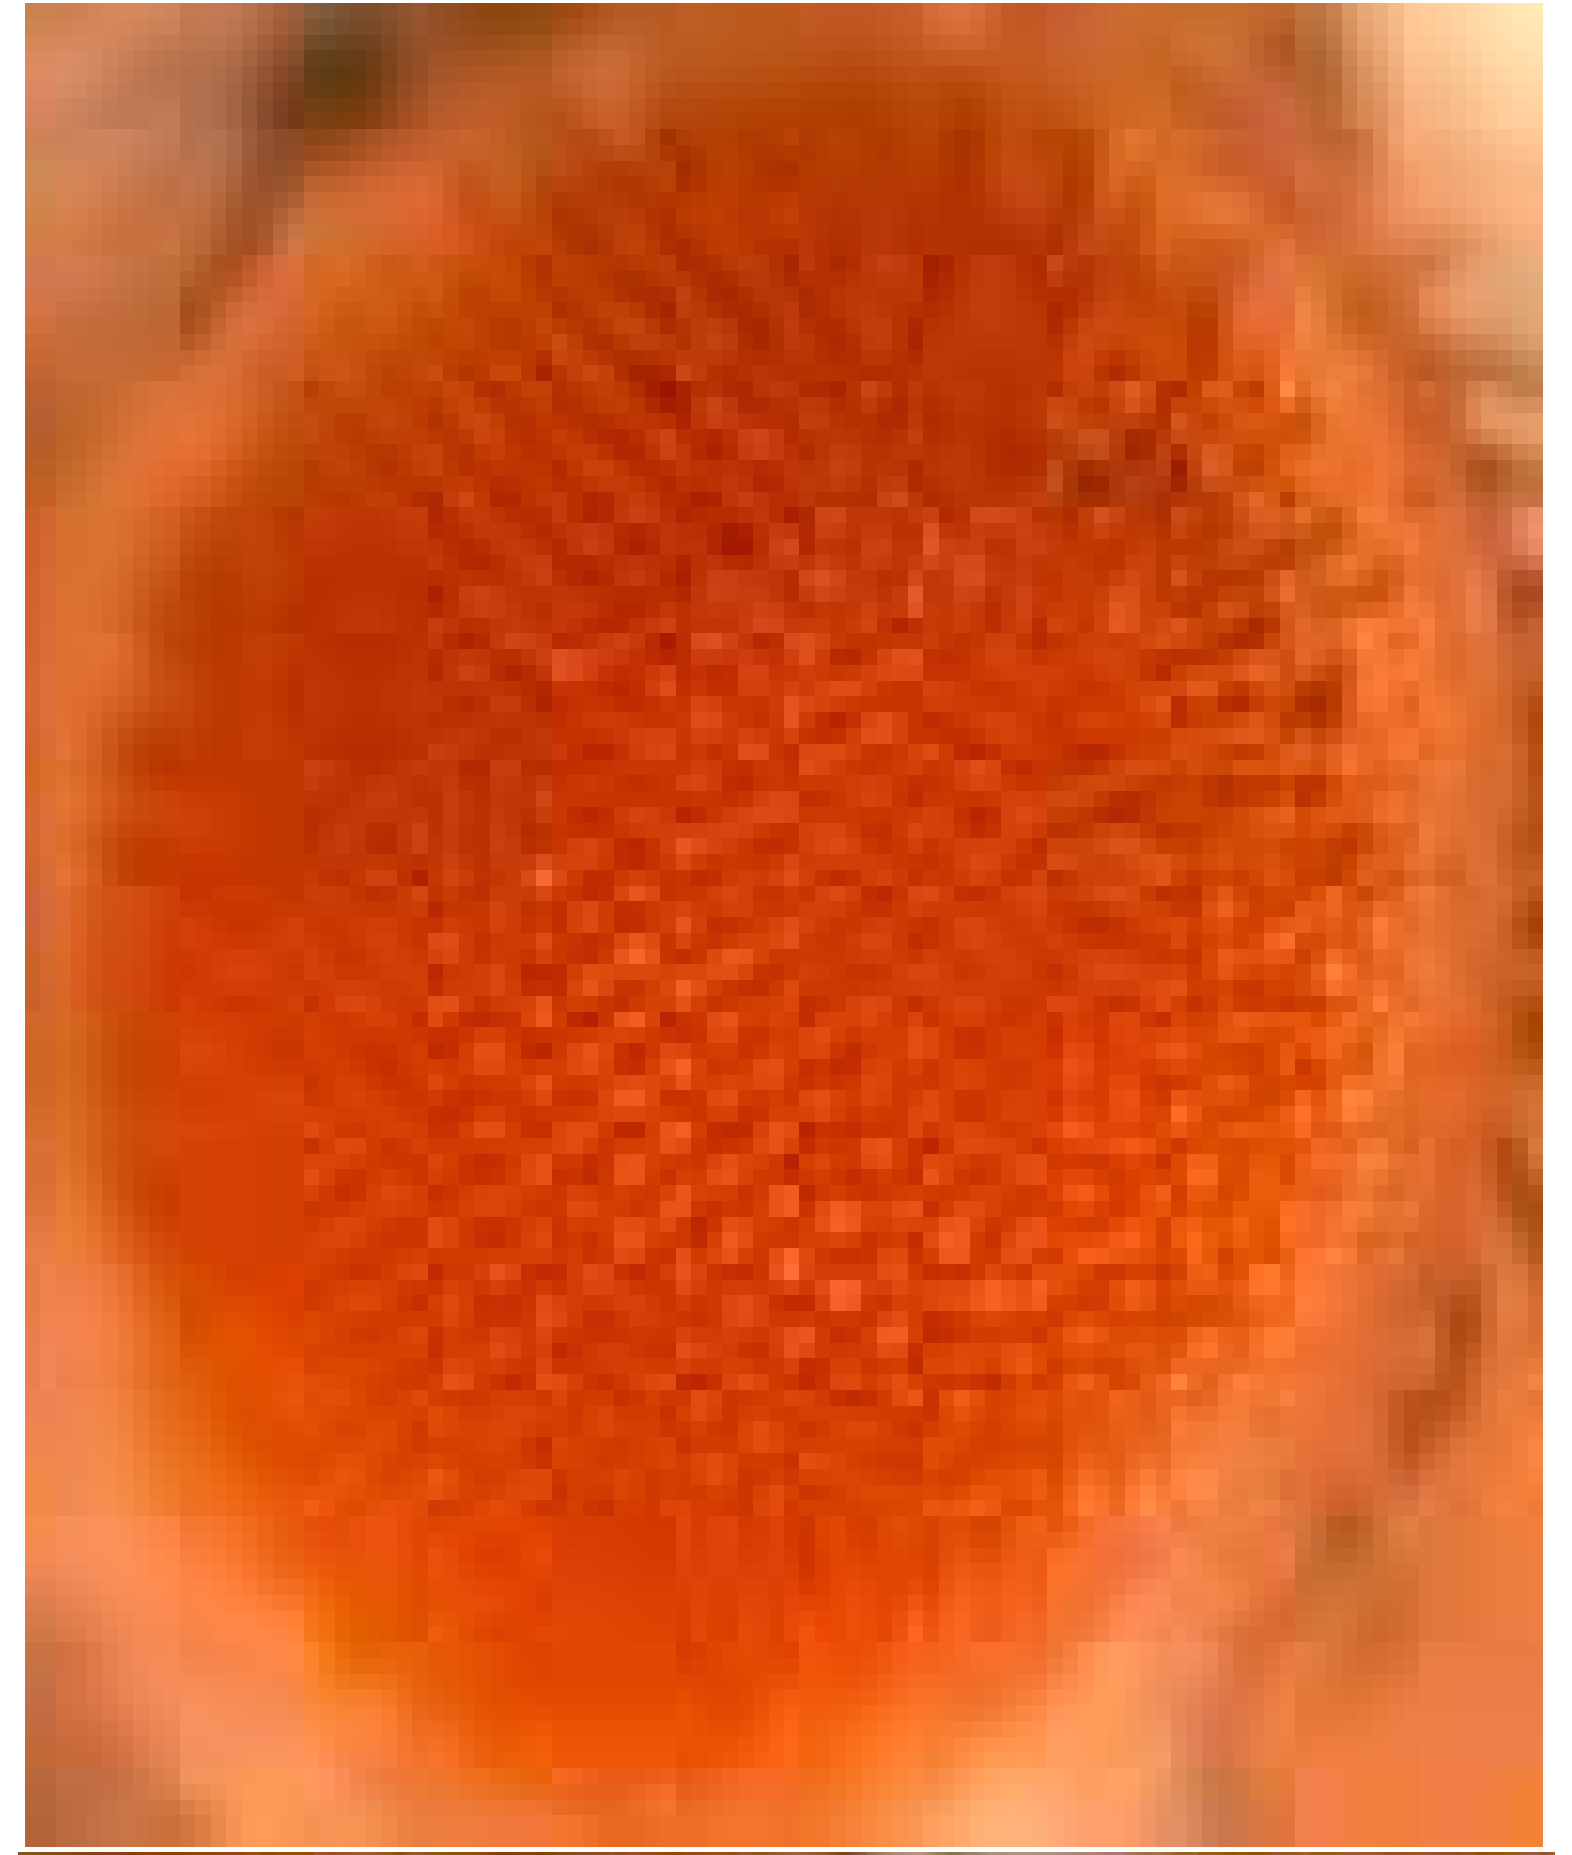

**C**

**D**

AR61Q

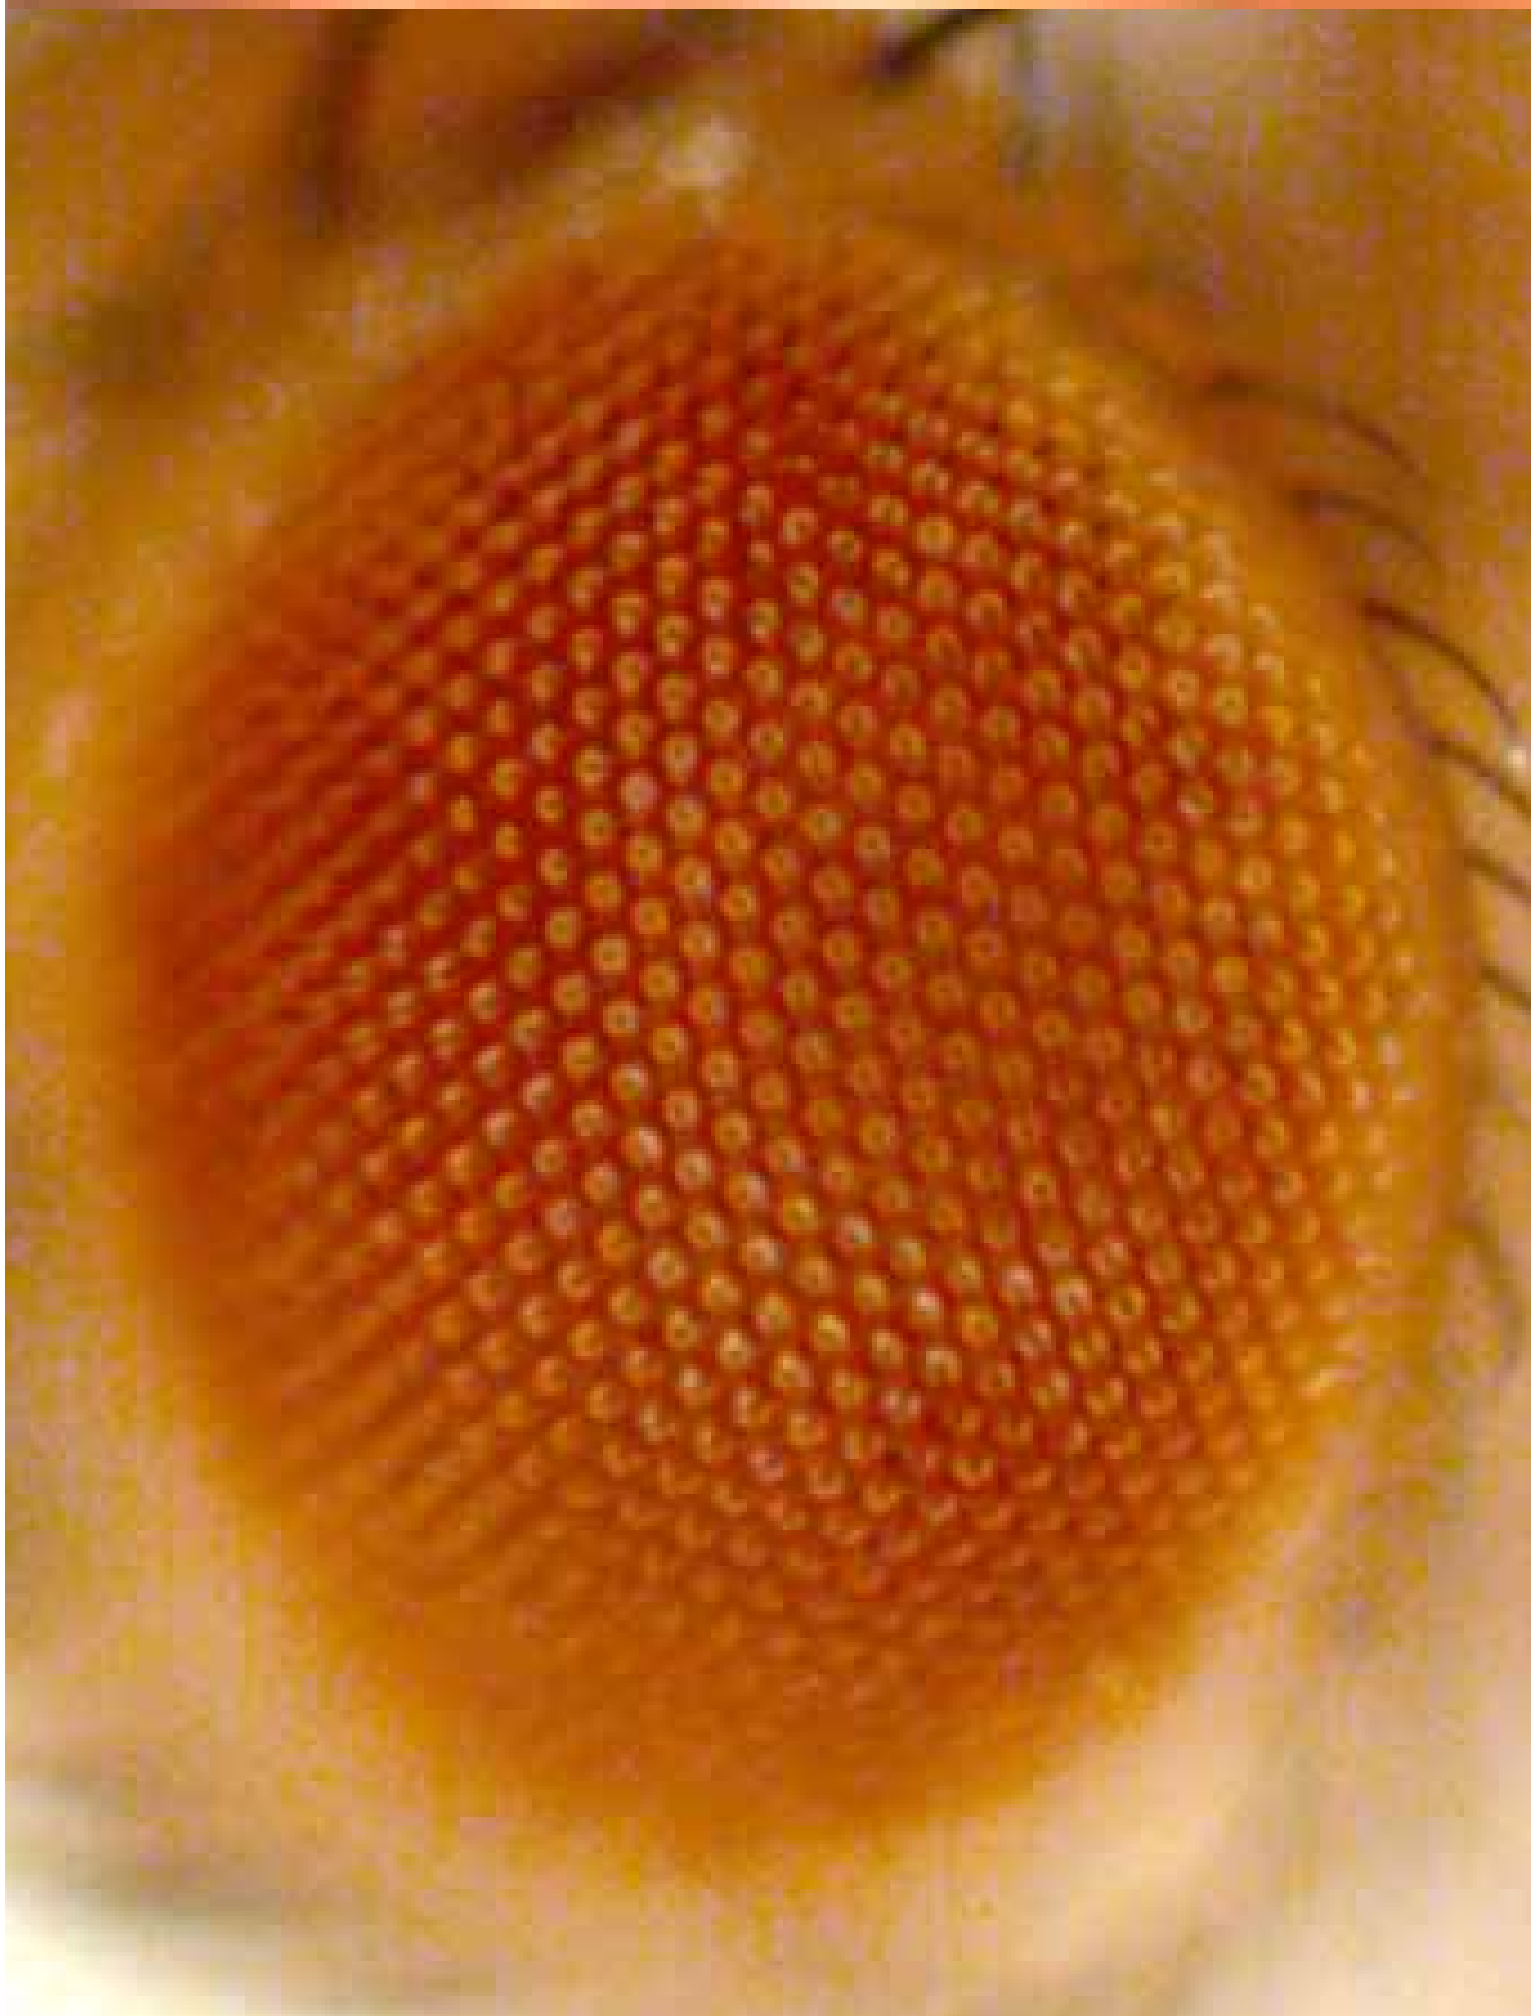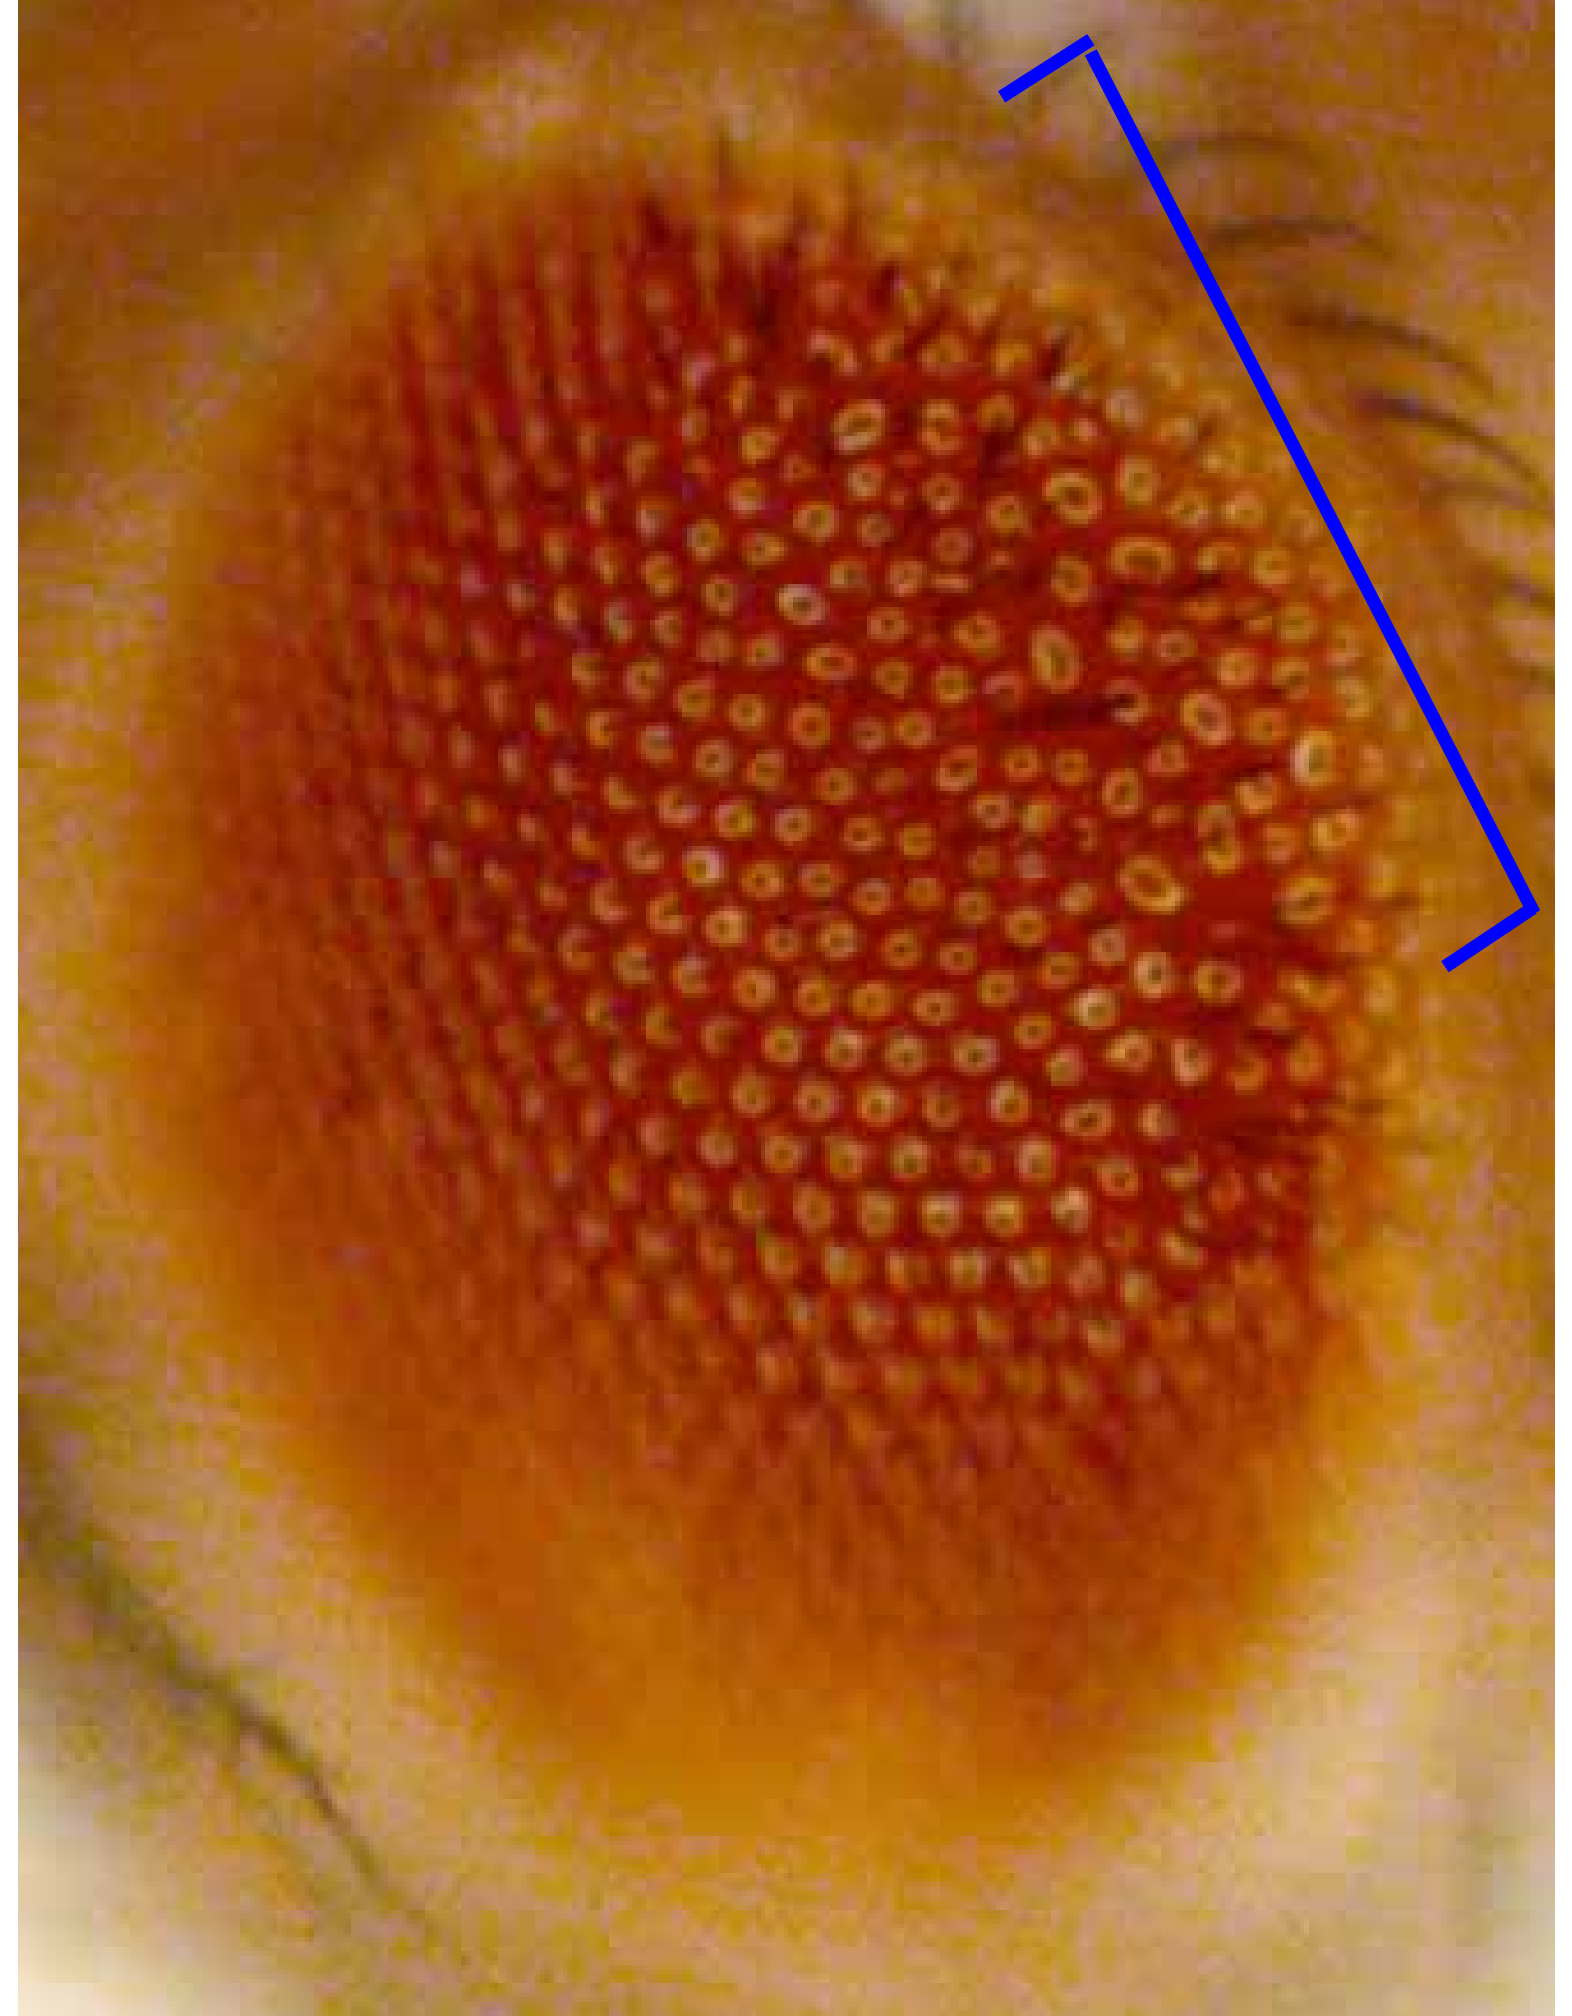

Supplement: supp [file elife_poa_e08493_Figure_3_figure_supplement_1.pdf › elife_poa_e08493_Figure_3_figure_supplement_1.pdf]

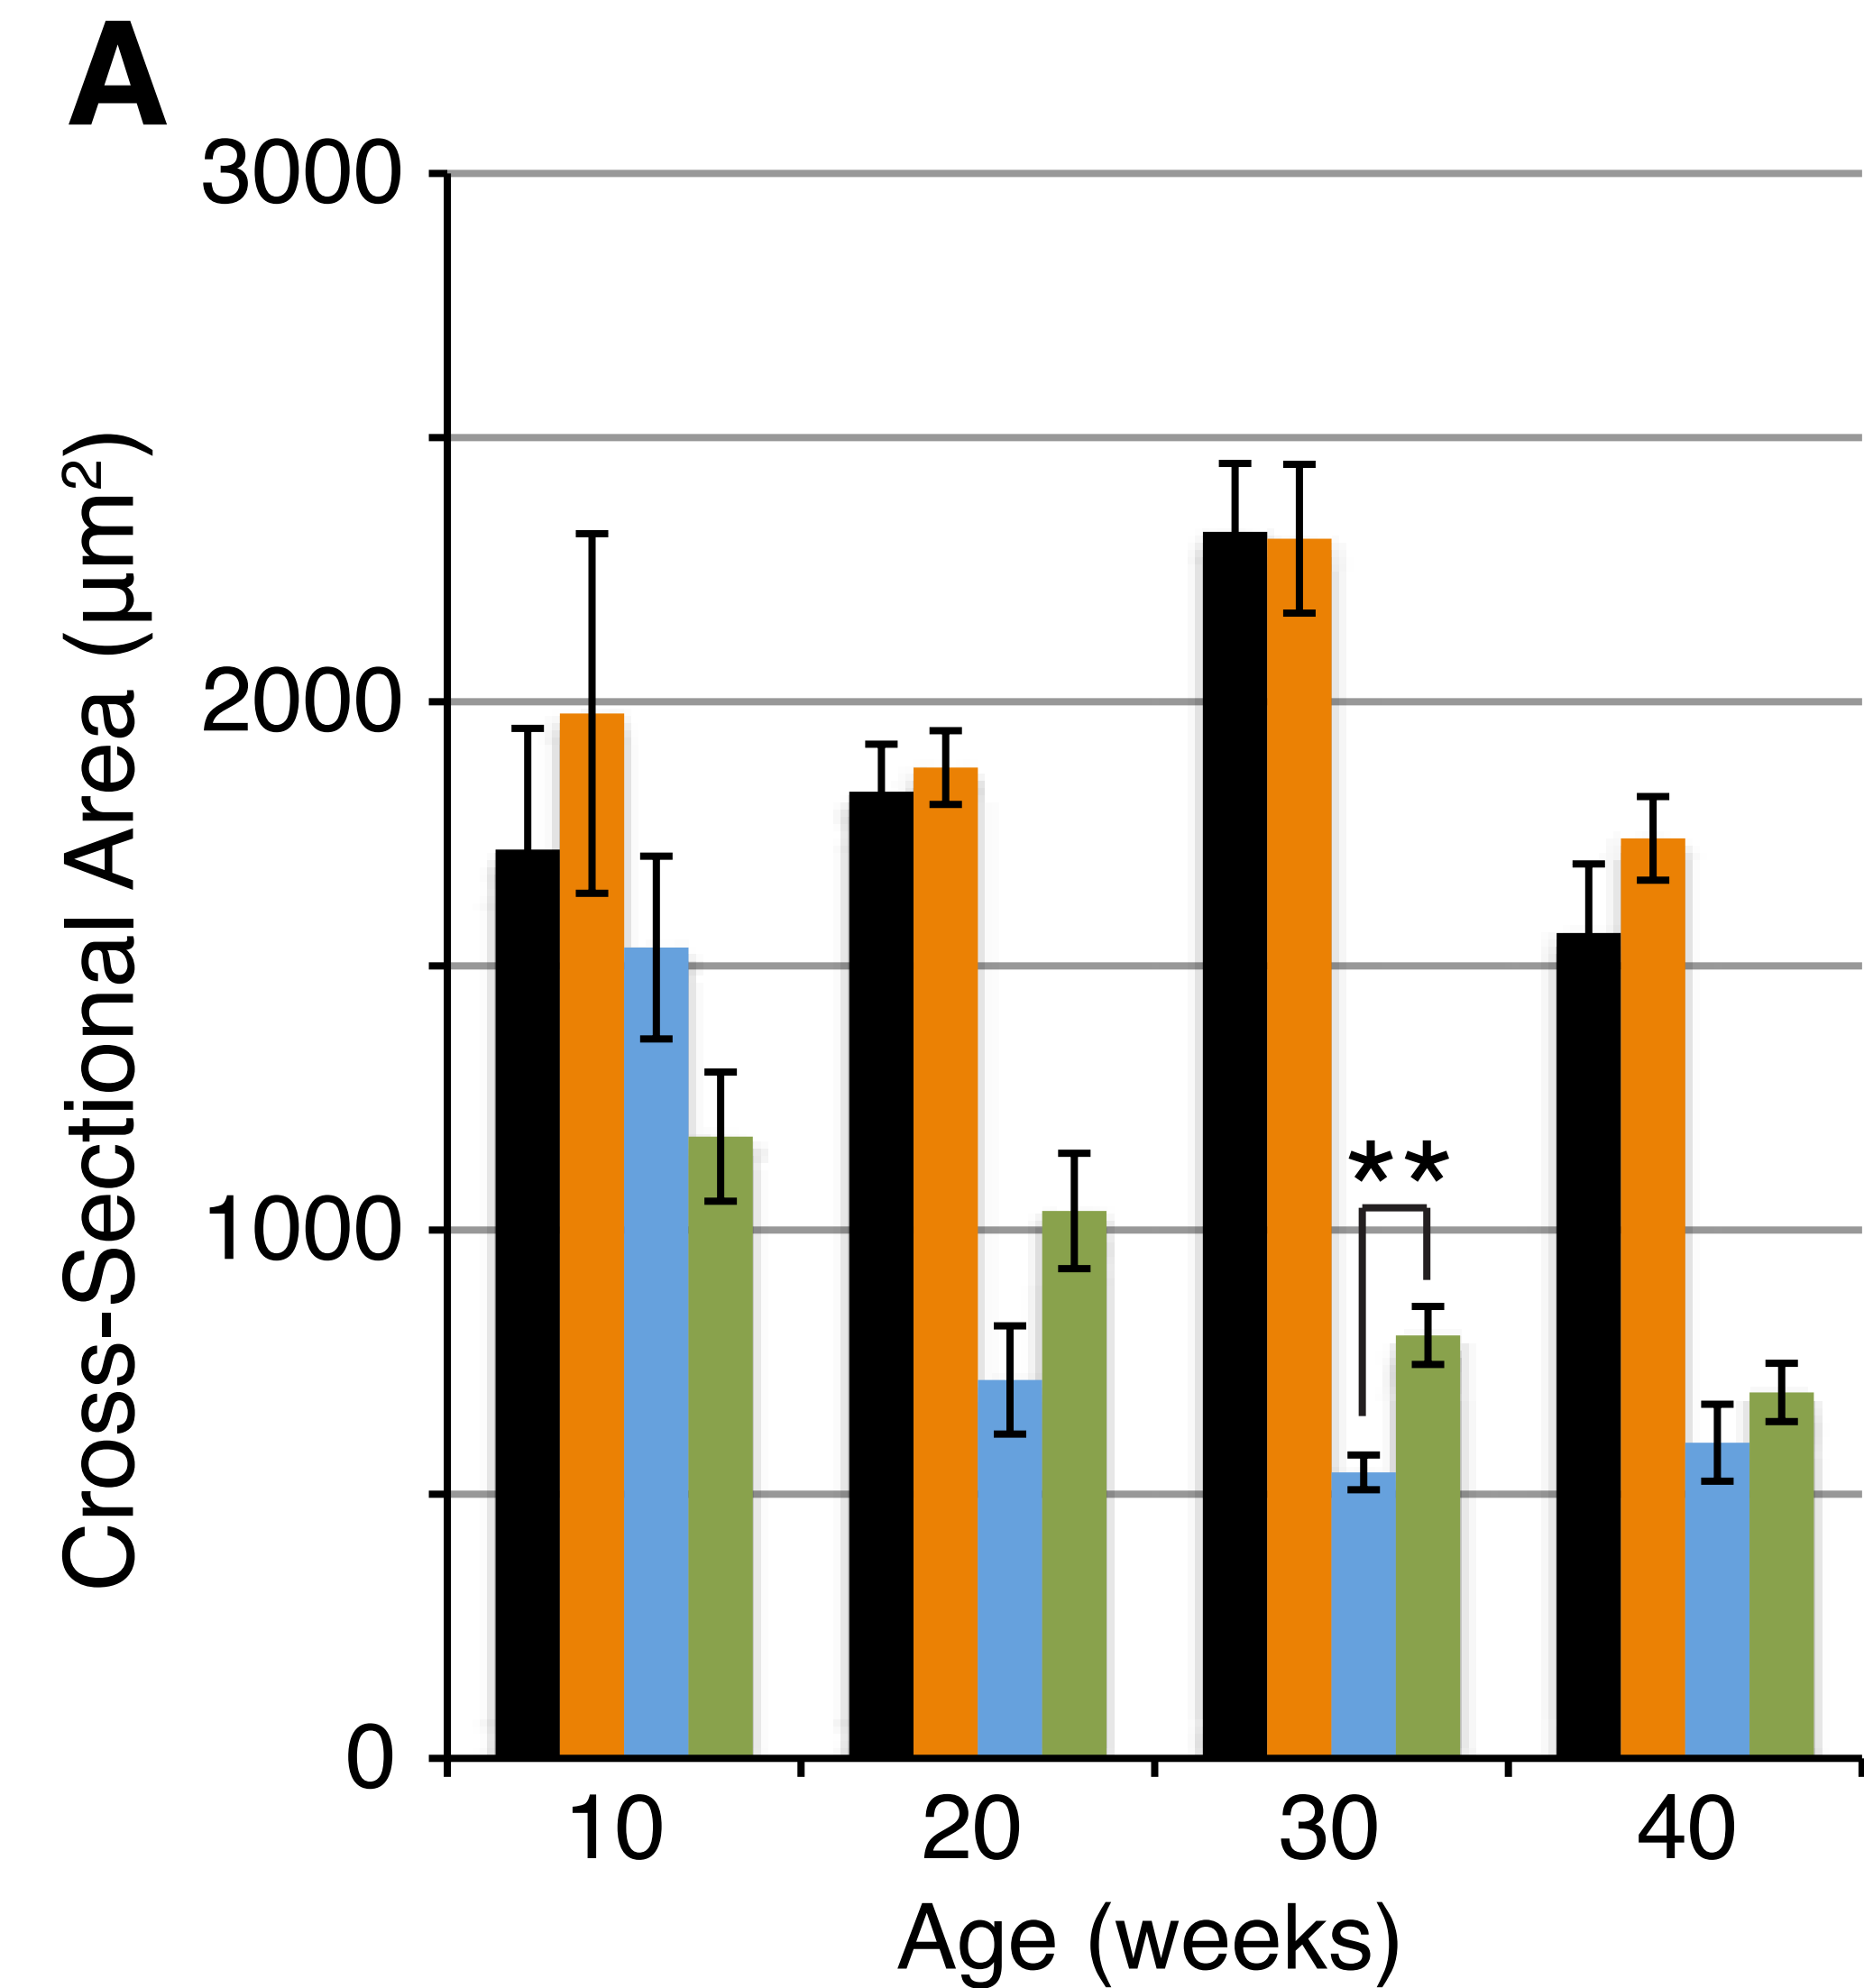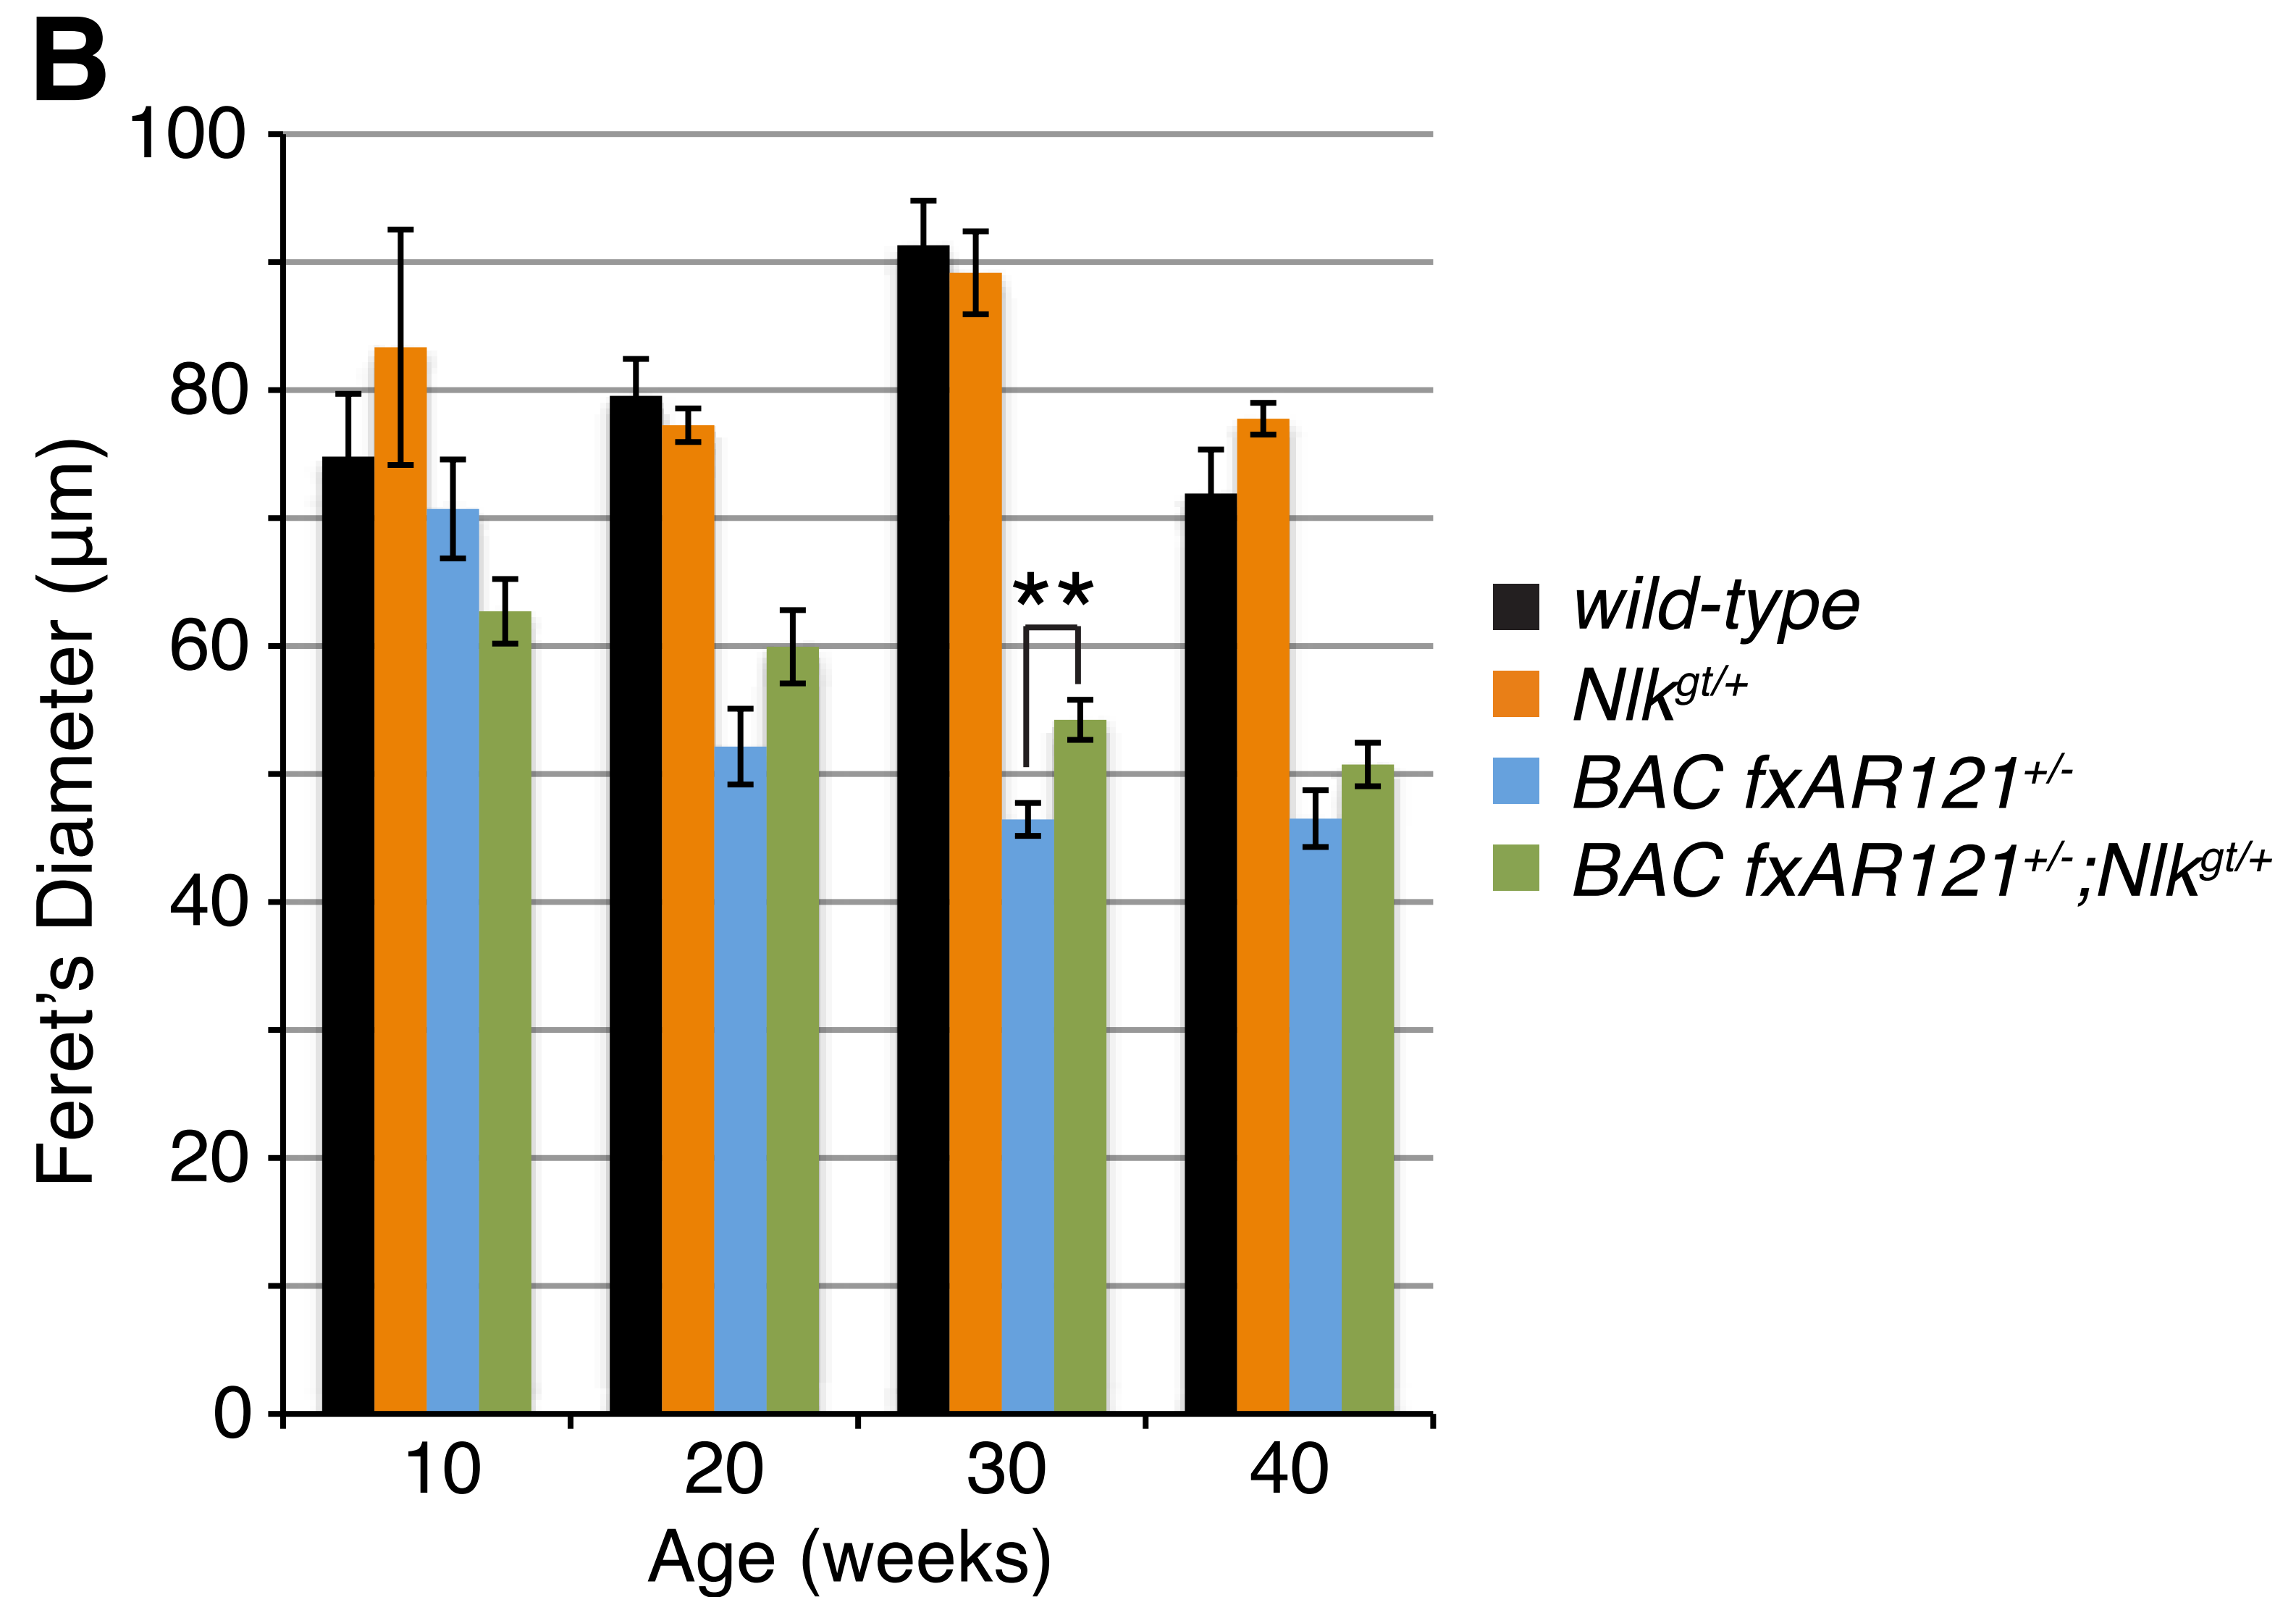

Supplement: supp [file elife_poa_e08493_Figure_7_figure_supplement_1.pdf › elife_poa_e08493_Figure_7_figure_supplement_1.pdf]

Mean Gray Value

4000

3000

2000

1000

0

10

20

30

Age (weeks)

-  *wild-type*
-  *Nlk<sup>gt/+</sup>*
-  *BAC fxAR121<sup>+/-</sup>*
-  *BAC fxAR121<sup>+/-</sup>;Nlk<sup>gt/+</sup>*

\*

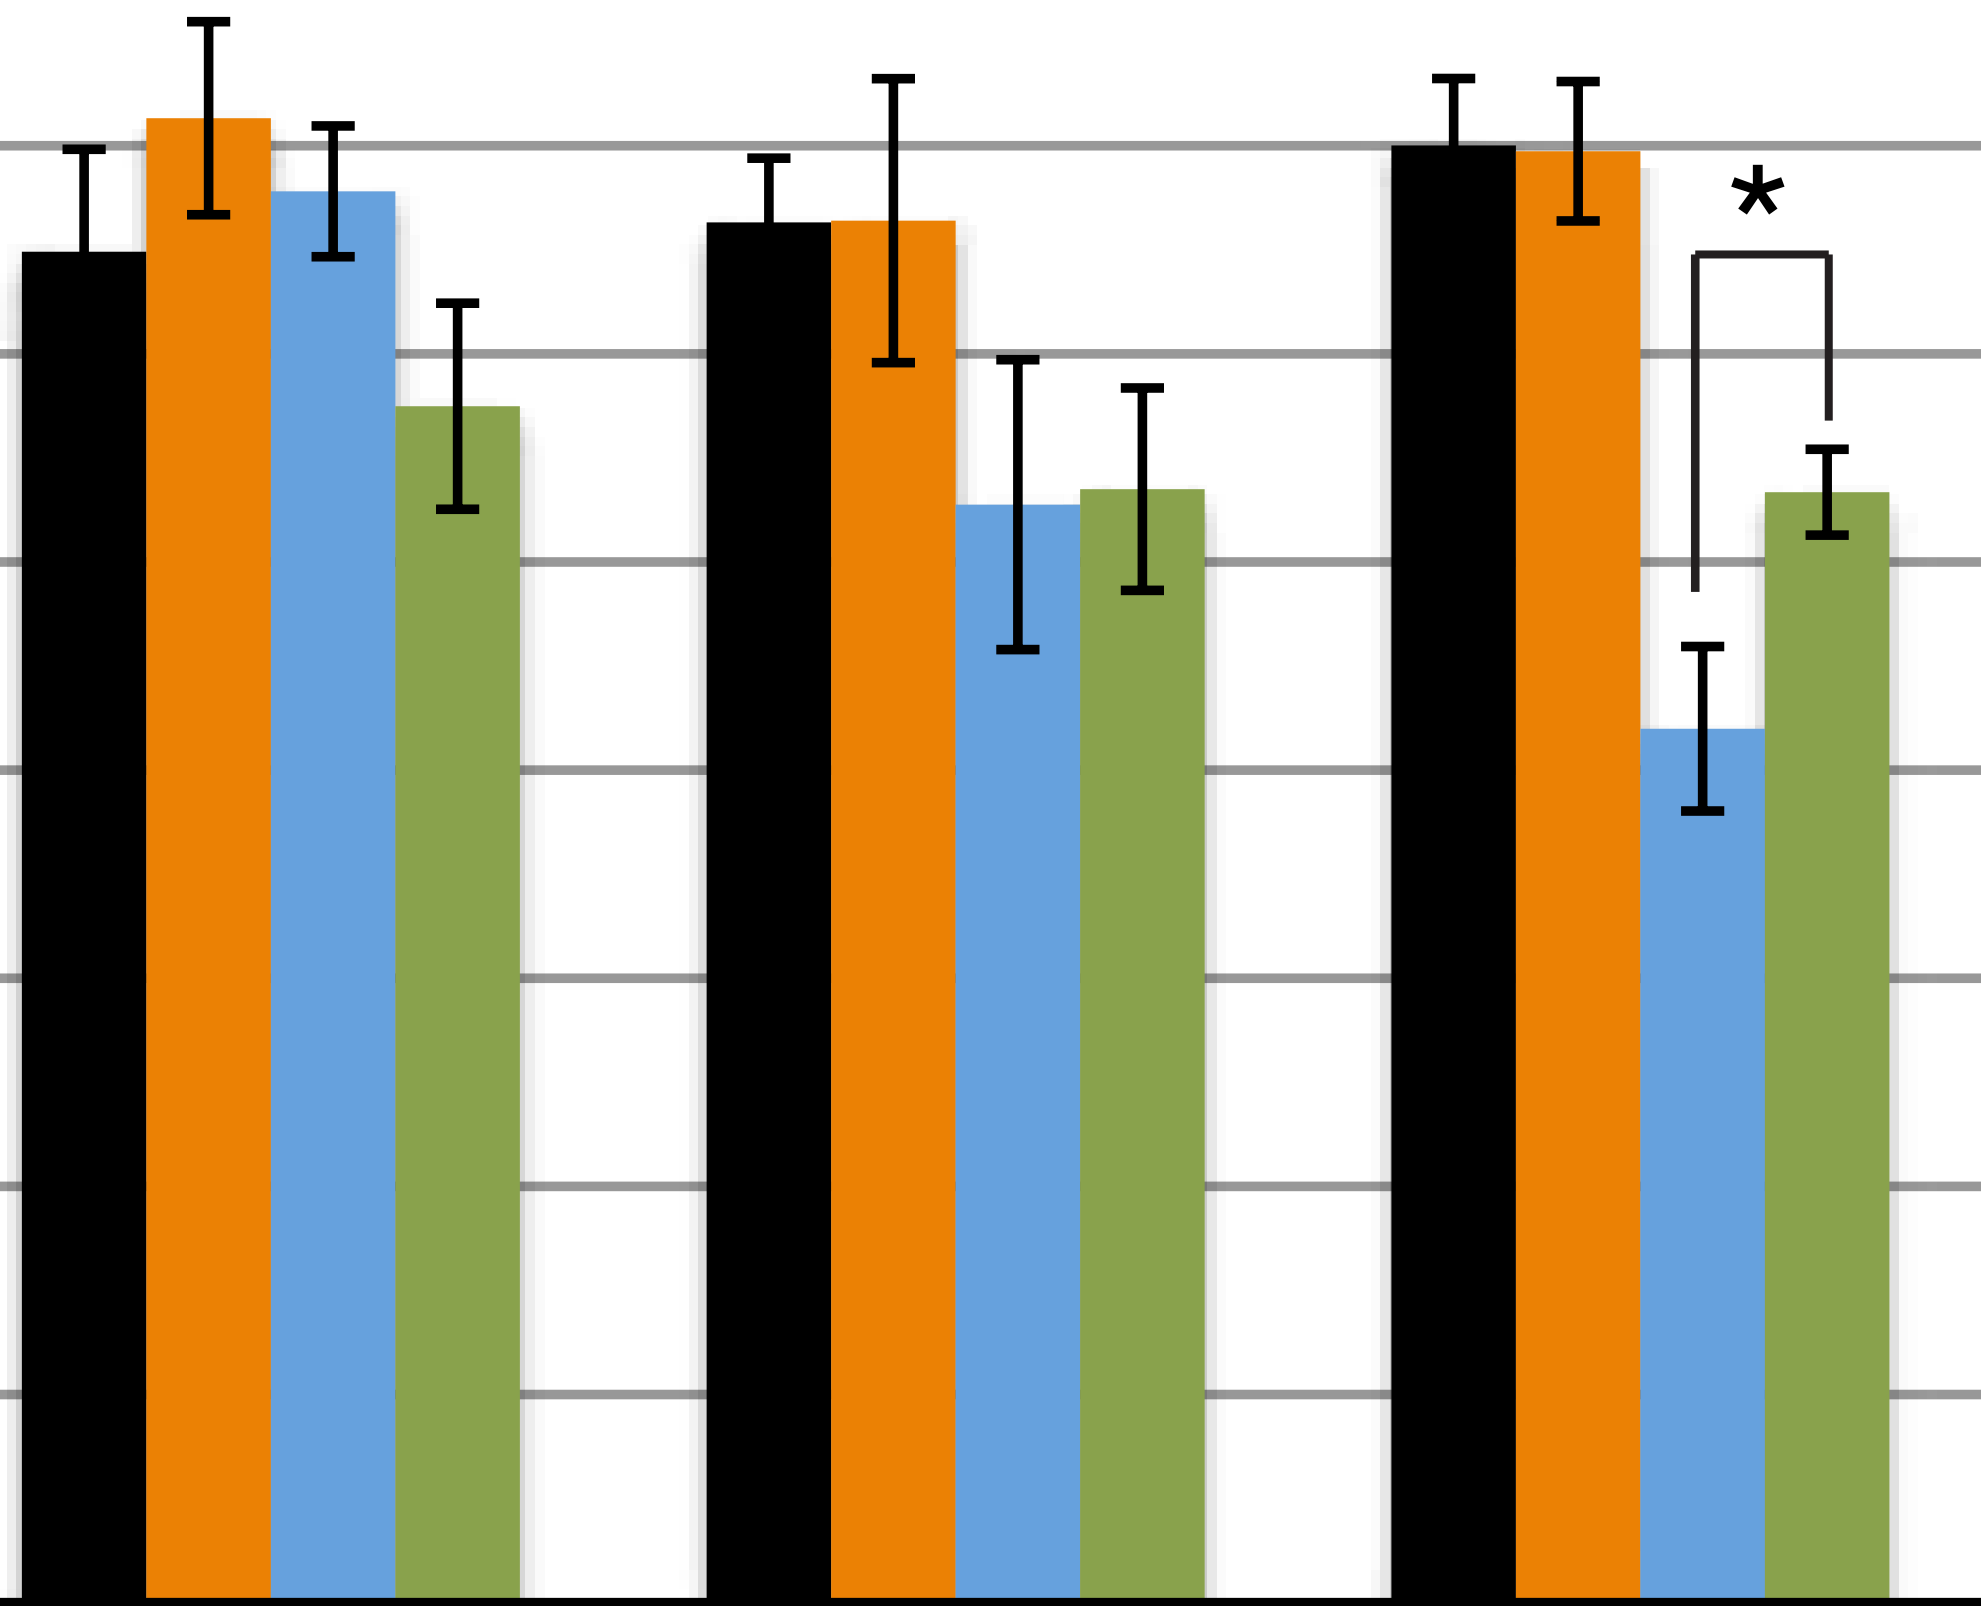

Supplement: supp [file elife_poa_e08493_Figure_7_figure_supplement_2.pdf › elife_poa_e08493_Figure_7_figure_supplement_2.pdf]
